# Supplementary material
Source: MDPI journal article supplement (https://www.mdpi.com/2071-1050/11/16/4274)
Supplement: s1 [file s1]

Archive with 2 entries (2 files):
- cuestionario isssp 2010 english.pdf
- Eurobarómetro 406 79-4 ZA5852_q_gb.pdf
