# Supplementary material
Source: MDPI journal article supplement (https://www.mdpi.com/2071-1050/11/16/4274)
Supplement: s1 [file s1 › cuestionario isssp 2010 english.pdf]

**Great Britain  
ISSP 2010 – Environment III  
Questionnaire**

## BRITISH SOCIAL ATTITUDES 2010 SELF-COMPLETION QUESTIONNAIRE

### *Completing the questionnaire:*

Please answer the questions in this booklet by placing a tick (✓) in one or more of the boxes, as instructed at each question.

All your answers will be treated in **strict confidence** in accordance with the Data Protection Act.

The questionnaire should not take very long to complete, and we hope you will find it interesting and enjoyable.

**Only the person who took part in the initial interview should complete this questionnaire**

### *Returning the questionnaire:*

Your interviewer will arrange with you the most convenient way of returning the questionnaire. If the interviewer has arranged to call back for it, please fill it in and keep it safely until then. If not, please complete it and post it back in the pre-paid, addressed envelope, **as soon as you possibly can**.

If you have any questions please call us on 0800 783 5890 or visit our website [www.natcen.ac.uk/bsa](http://www.natcen.ac.uk/bsa).

**THANK YOU AGAIN FOR YOUR HELP.**

#### INTERVIEWER TO ENTER

|         |                                                                                                                                                                         |                    |
|---------|-------------------------------------------------------------------------------------------------------------------------------------------------------------------------|--------------------|
| 1001-7  | <input type="text"/> | Serial number      |
| 1009-11 | <input type="text"/> <input type="text"/> <input type="text"/>                                                                                                          | Sample point       |
| 1012-15 | <input type="text"/>                      | Interviewer number |

#### OFFICE USE ONLY

|                 |                                |              |
|-----------------|--------------------------------|--------------|
| 1008            | <input type="text" value="1"/> | Card number  |
| 1016-20         |                                | Batch Number |
| 1021            | <input type="text" value="1"/> | Version      |
| SPARE 1022-1030 |                                |              |

This is a blank page

1a. Which of these issues is the **most important** for Britain today?

PLEASE TICK **ONE** BOX ONLY

(✓)

|                 |                          |      |
|-----------------|--------------------------|------|
| Health care     | <input type="checkbox"/> | (01) |
| Education       | <input type="checkbox"/> | (02) |
| Crime           | <input type="checkbox"/> | (03) |
| The environment | <input type="checkbox"/> | (04) |
| Immigration     | <input type="checkbox"/> | (05) |
| The economy     | <input type="checkbox"/> | (06) |
| Terrorism       | <input type="checkbox"/> | (07) |
| Poverty         | <input type="checkbox"/> | (08) |
| None of these   | <input type="checkbox"/> | (09) |
| Can't choose    | <input type="checkbox"/> | (98) |

1031-2

b. Which is the **next most important**?

PLEASE TICK **ONE** BOX ONLY

(✓)

|                 |                          |      |
|-----------------|--------------------------|------|
| Health care     | <input type="checkbox"/> | (01) |
| Education       | <input type="checkbox"/> | (02) |
| Crime           | <input type="checkbox"/> | (03) |
| The environment | <input type="checkbox"/> | (04) |
| Immigration     | <input type="checkbox"/> | (05) |
| The economy     | <input type="checkbox"/> | (06) |
| Terrorism       | <input type="checkbox"/> | (07) |
| Poverty         | <input type="checkbox"/> | (08) |
| None of these   | <input type="checkbox"/> | (09) |
| Can't choose    | <input type="checkbox"/> | (98) |

1033-4

2. How much do you agree or disagree with each of these statements?

| <i>PLEASE TICK <b>ONE</b> BOX<br/>ON EACH LINE</i>                                                                                            | <b>Agree<br/>strongly</b> | <b>Agree</b>             | <b>Neither<br/>agree nor<br/>disagree</b> | <b>Disagree</b>          | <b>Disagree<br/>strongly</b> | <b>Can't<br/>choose</b>  |
|-----------------------------------------------------------------------------------------------------------------------------------------------|---------------------------|--------------------------|-------------------------------------------|--------------------------|------------------------------|--------------------------|
| a. Private enterprise is the best way to solve Britain's economic problems                                                                    | <input type="checkbox"/>  | <input type="checkbox"/> | <input type="checkbox"/>                  | <input type="checkbox"/> | <input type="checkbox"/>     | <input type="checkbox"/> |
|                                                                                                                                               | (1)                       | (2)                      | (3)                                       | (4)                      | (5)                          | (8)                      |
| b. It is the responsibility of the government to reduce the differences in income between people with high incomes and those with low incomes | <input type="checkbox"/>  | <input type="checkbox"/> | <input type="checkbox"/>                  | <input type="checkbox"/> | <input type="checkbox"/>     | <input type="checkbox"/> |
|                                                                                                                                               | (1)                       | (2)                      | (3)                                       | (4)                      | (5)                          | (8)                      |

1035

1036

3a. Looking at the list below, please tick a box next to the **one** thing you think should be Britain's **highest priority**, the most important thing it should do.

*PLEASE TICK **ONE** BOX ONLY*

**Britain should ...**

**Highest  
priority**

(✓)

Maintain order in the nation ☐ (1)

Give people more say in government decisions ☐ (2)

Fight rising prices ☐ (3)

Protect freedom of speech ☐ (4)

Can't choose ☐ (8)

1037

b. And which **one** do you think should be Britain's **next highest priority**, the second most important thing it should do?

*PLEASE TICK **ONE** BOX ONLY*

**Britain should...**

**Next highest  
priority**

(✓)

Maintain order in the nation ☐ (1)

Give people more say in government decisions ☐ (2)

Fight rising prices ☐ (3)

Protect freedom of speech ☐ (4)

Can't choose ☐ (8)

1038

- 4a. Generally speaking, would you say that most people can be trusted, or that you can't be too careful in dealing with people?  
Please tick one box to show what you think, where 1 means you can't be too careful and 5 means most people can be trusted.

PLEASE TICK **ONE** BOX ONLY

**You can't be too careful**

**Most people can be trusted**

**Can't choose**

**1**

**2**

**3**

**4**

**5**

☐
☐
☐
☐
☐
☐

(1)

(2)

(3)

(4)

(5)

(8)

1039

- b. Generally speaking, do you think that most people would try to take advantage of you if they got the chance, or would they try to be fair?  
Please tick one box to show what you think, where 1 means most people would try to take advantage of you and 5 means that most people would try to be fair.

PLEASE TICK **ONE** BOX ONLY

**Most people would try to take advantage**

**Most people would try to be fair**

**Can't choose**

**1**

**2**

**3**

**4**

**5**

☐
☐
☐
☐
☐
☐

(1)

(2)

(3)

(4)

(5)

(8)

1040

5. To what extent do you agree or disagree with the following statements?

PLEASE TICK **ONE** BOX  
ON EACH LINE

**Agree strongly**

**Agree**

**Neither agree nor disagree**

**Disagree**

**Disagree strongly**

**Can't choose**

- a. Most of the time we can trust people in government to do what is right

☐
☐
☐
☐
☐
☐

1041

- b. Most politicians are in politics only for what they can get out of it personally

☐
☐
☐
☐
☐
☐

(1)

(2)

(3)

(4)

(5)

(8)

1042

6. Generally speaking, how concerned are you about environmental issues?  
Please tick one box below to indicate what you think, where 1 means you are not at all concerned and 5 means you are very concerned.

PLEASE TICK **ONE** BOX ONLY

**Not at all concerned**

**Very concerned**

**Can't choose**

**1**

**2**

**3**

**4**

**5**

☐
☐
☐
☐
☐
☐

(1)

(2)

(3)

(4)

(5)

(8)

1043

7. Here is a list of some different environmental problems.

a) Which problem, if any, do you think is the most important **for Britain as a whole**?

PLEASE TICK **ONE** BOX ONLY

(✓)

- |                                |                          |      |
|--------------------------------|--------------------------|------|
| Air pollution                  | <input type="checkbox"/> | (01) |
| Chemicals and pesticides       | <input type="checkbox"/> | (02) |
| Water shortage                 | <input type="checkbox"/> | (03) |
| Water pollution                | <input type="checkbox"/> | (04) |
| Nuclear waste                  | <input type="checkbox"/> | (05) |
| Domestic waste disposal        | <input type="checkbox"/> | (06) |
| Climate change                 | <input type="checkbox"/> | (07) |
| Genetically modified foods     | <input type="checkbox"/> | (08) |
| Using up our natural resources | <input type="checkbox"/> | (09) |
| None of these                  | <input type="checkbox"/> | (10) |
| Can't choose                   | <input type="checkbox"/> | (98) |

1044-5

b) Which problem, if any, **affects you and your family** the most?

PLEASE TICK **ONE** BOX ONLY

(✓)

- |                                |                          |      |
|--------------------------------|--------------------------|------|
| Air pollution                  | <input type="checkbox"/> | (01) |
| Chemicals and pesticides       | <input type="checkbox"/> | (02) |
| Water shortage                 | <input type="checkbox"/> | (03) |
| Water pollution                | <input type="checkbox"/> | (04) |
| Nuclear waste                  | <input type="checkbox"/> | (05) |
| Domestic waste disposal        | <input type="checkbox"/> | (06) |
| Climate change                 | <input type="checkbox"/> | (07) |
| Genetically modified foods     | <input type="checkbox"/> | (08) |
| Using up our natural resources | <input type="checkbox"/> | (09) |
| None of these                  | <input type="checkbox"/> | (10) |
| Can't choose                   | <input type="checkbox"/> | (98) |

1046-7

- 8a. How much do you feel you know about the **causes** of these sorts of environmental problems?  
Please tick one box below to indicate what you think, where 1 indicates you feel you know nothing at all and 5 indicates you feel you know a great deal.

PLEASE TICK **ONE** BOX ONLY

Know nothing at all

Know a great deal

Can't  
choose

1

2

3

4

5

☐
☐
☐
☐
☐
☐

(1)

(2)

(3)

(4)

(5)

(8)

1048

- b. And how much do you feel you know about **solutions** to these sorts of environmental problems?  
Please tick one box below to indicate what you think, where 1 indicates you feel you know nothing at all and 5 indicates you feel you know a great deal.

PLEASE TICK **ONE** BOX ONLY

Know nothing at all

Know a great deal

Can't  
choose

1

2

3

4

5

☐
☐
☐
☐
☐
☐

(1)

(2)

(3)

(4)

(5)

(8)

1049

9. How much do you agree or disagree with each of these statements?

PLEASE TICK **ONE** BOX  
ON EACH LINE

Agree  
strongly

Agree

Neither  
agree nor  
disagree

Disagree

Disagree  
strongly

Can't  
choose

- a. We believe too often in science, and not enough in feelings and faith
- b. Overall, modern science does more harm than good
- c. Modern science will solve our environmental problems with little change to our way of life

☐
☐
☐
☐
☐
☐

(1)

(2)

(3)

(4)

(5)

(8)

1050

1051

1052

10. And how much do you agree or disagree with each of these statements?

PLEASE TICK **ONE** BOX  
ON EACH LINE

Agree  
strongly

Agree

Neither  
agree nor  
disagree

Disagree

Disagree  
strongly

Can't  
choose

- a. We worry too much about the future of the environment and not enough about prices and jobs today
- b. Almost everything we do in modern life harms the environment
- c. People worry too much about human progress harming the environment

☐
☐
☐
☐
☐
☐

(1)

(2)

(3)

(4)

(5)

(8)

1053

1054

1055

11. And please tick one box for each of **these** statements to show how much you agree or disagree with it.

| <i>PLEASE TICK <b>ONE</b> BOX<br/>ON EACH LINE</i>                                         | <b>Agree<br/>strongly</b> | <b>Agree</b>             | <b>Neither<br/>agree nor<br/>disagree</b> | <b>Disagree</b>          | <b>Disagree<br/>strongly</b> | <b>Can't<br/>choose</b>  |
|--------------------------------------------------------------------------------------------|---------------------------|--------------------------|-------------------------------------------|--------------------------|------------------------------|--------------------------|
| a. In order to protect the environment<br>Britain needs economic growth                    | <input type="checkbox"/>  | <input type="checkbox"/> | <input type="checkbox"/>                  | <input type="checkbox"/> | <input type="checkbox"/>     | <input type="checkbox"/> |
| b. Economic growth always harms<br>the environment                                         | <input type="checkbox"/>  | <input type="checkbox"/> | <input type="checkbox"/>                  | <input type="checkbox"/> | <input type="checkbox"/>     | <input type="checkbox"/> |
| c. The earth simply cannot continue<br>to support population growth<br>at its present rate | <input type="checkbox"/>  | <input type="checkbox"/> | <input type="checkbox"/>                  | <input type="checkbox"/> | <input type="checkbox"/>     | <input type="checkbox"/> |
|                                                                                            | (1)                       | (2)                      | (3)                                       | (4)                      | (5)                          | (8)                      |

1056

1057

1058

- 12a. How willing would **you** be to pay **much higher prices** in order to protect the environment?

*PLEASE TICK **ONE** BOX ONLY*

(✓)

|                                       |                          |     |
|---------------------------------------|--------------------------|-----|
| Very willing                          | <input type="checkbox"/> | (1) |
| Fairly willing                        | <input type="checkbox"/> | (2) |
| Neither willing nor <u>un</u> willing | <input type="checkbox"/> | (3) |
| Fairly <u>un</u> willing              | <input type="checkbox"/> | (4) |
| Very <u>un</u> willing                | <input type="checkbox"/> | (5) |
| Can't choose                          | <input type="checkbox"/> | (8) |

1059

- b. And how willing would **you** be to pay **much higher taxes** in order to protect the environment?

*PLEASE TICK **ONE** BOX ONLY*

(✓)

|                                       |                          |     |
|---------------------------------------|--------------------------|-----|
| Very willing                          | <input type="checkbox"/> | (1) |
| Fairly willing                        | <input type="checkbox"/> | (2) |
| Neither willing nor <u>un</u> willing | <input type="checkbox"/> | (3) |
| Fairly <u>un</u> willing              | <input type="checkbox"/> | (4) |
| Very <u>un</u> willing                | <input type="checkbox"/> | (5) |
| Can't choose                          | <input type="checkbox"/> | (8) |

1060

12c. And how willing would **you** be to **accept cuts in your standard of living** in order to protect the environment?

PLEASE TICK **ONE** BOX ONLY

- (✓)
- Very willing ☐ (1)
- Fairly willing ☐ (2)
- Neither willing nor unwilling ☐ (3)
- Fairly unwilling ☐ (4)
- Very unwilling ☐ (5)
- Can't choose ☐ (8)

1061

13. How much do you agree or disagree with each of these statements?

PLEASE TICK **ONE** BOX  
ON EACH LINE

- |                                                                                             | Agree<br>strongly        | Agree                    | Neither<br>agree nor<br>disagree | Disagree                 | Disagree<br>strongly     | Can't<br>choose          |
|---------------------------------------------------------------------------------------------|--------------------------|--------------------------|----------------------------------|--------------------------|--------------------------|--------------------------|
| a. It is just too difficult for someone like me to do much about the environment            | <input type="checkbox"/> | <input type="checkbox"/> | <input type="checkbox"/>         | <input type="checkbox"/> | <input type="checkbox"/> | <input type="checkbox"/> |
| b. I do what is right for the environment, even when it costs more money or takes more time | <input type="checkbox"/> | <input type="checkbox"/> | <input type="checkbox"/>         | <input type="checkbox"/> | <input type="checkbox"/> | <input type="checkbox"/> |
| c. There are more important things to do in life than protect the environment               | <input type="checkbox"/> | <input type="checkbox"/> | <input type="checkbox"/>         | <input type="checkbox"/> | <input type="checkbox"/> | <input type="checkbox"/> |
| d. There is no point in doing what I can for the environment unless others do the same      | <input type="checkbox"/> | <input type="checkbox"/> | <input type="checkbox"/>         | <input type="checkbox"/> | <input type="checkbox"/> | <input type="checkbox"/> |
| e. Many of the claims about environmental threats are exaggerated                           | <input type="checkbox"/> | <input type="checkbox"/> | <input type="checkbox"/>         | <input type="checkbox"/> | <input type="checkbox"/> | <input type="checkbox"/> |
| f. I find it hard to know whether the way I live is helpful or harmful to the environment   | <input type="checkbox"/> | <input type="checkbox"/> | <input type="checkbox"/>         | <input type="checkbox"/> | <input type="checkbox"/> | <input type="checkbox"/> |
| g. Environmental problems have a direct effect on my everyday life                          | <input type="checkbox"/> | <input type="checkbox"/> | <input type="checkbox"/>         | <input type="checkbox"/> | <input type="checkbox"/> | <input type="checkbox"/> |
|                                                                                             | (1)                      | (2)                      | (3)                              | (4)                      | (5)                      | (8)                      |

1062

1063

1064

1065

1066

1067

1068

14a. In general, do you think that **air pollution caused by cars** is ...

PLEASE TICK **ONE** BOX ONLY

(✓)

- ... extremely dangerous for the environment, ☐ (1)
- very dangerous, ☐ (2)
- somewhat dangerous, ☐ (3)
- not very dangerous, ☐ (4)
- or, not dangerous at all for the environment? ☐ (5)
- Can't choose ☐ (8)

1069

b. In general, do you think that **air pollution caused by industry** is ...

PLEASE TICK **ONE** BOX ONLY

(✓)

- ... extremely dangerous for the environment, ☐ (1)
- very dangerous, ☐ (2)
- somewhat dangerous, ☐ (3)
- not very dangerous, ☐ (4)
- or, not dangerous at all for the environment? ☐ (5)
- Can't choose ☐ (8)

1070

c. And do you think that **pesticides and chemicals used in farming** are ...

PLEASE TICK **ONE** BOX ONLY

(✓)

- ... extremely dangerous for the environment, ☐ (1)
- very dangerous, ☐ (2)
- somewhat dangerous, ☐ (3)
- not very dangerous, ☐ (4)
- or, not dangerous at all for the environment? ☐ (5)
- Can't choose ☐ (8)

1071

14d. And do you think that **pollution of Britain's rivers, lakes and streams** is ...

PLEASE TICK **ONE** BOX ONLY

(✓)

- ... extremely dangerous for the environment, ☐ (1)
- very dangerous, ☐ (2)
- somewhat dangerous, ☐ (3)
- not very dangerous, ☐ (4)
- or, not dangerous at all for the environment? ☐ (5)
- Can't choose ☐ (8)

1072

e. In general, do you think that **a rise in the world's temperature caused by climate change** is ...

PLEASE TICK **ONE** BOX ONLY

(✓)

- ... extremely dangerous for the environment, ☐ (1)
- very dangerous, ☐ (2)
- somewhat dangerous, ☐ (3)
- not very dangerous, ☐ (4)
- or, not dangerous at all for the environment? ☐ (5)
- Can't choose ☐ (8)

1073

f. And do you think that **modifying the genes of certain crops** is ...

PLEASE TICK **ONE** BOX ONLY

(✓)

- ... extremely dangerous for the environment, ☐ (1)
- very dangerous, ☐ (2)
- somewhat dangerous, ☐ (3)
- not very dangerous, ☐ (4)
- or, not dangerous at all for the environment? ☐ (5)
- Can't choose ☐ (8)

1074

g. And do you think that **nuclear power stations** are...

PLEASE TICK **ONE** BOX ONLY

(✓)

- ... extremely dangerous for the environment, ☐ (1)
- very dangerous, ☐ (2)
- somewhat dangerous, ☐ (3)
- not very dangerous, ☐ (4)
- or, not dangerous at all for the environment? ☐ (5)
- Can't choose ☐ (8)

1075

15a. If you had to choose, which **one** of the following would be closest to your views?

PLEASE TICK **ONE**  
BOX ONLY

Government should let **ordinary people** decide for themselves how to protect the environment, even if it means they don't always do the right thing ☒ (1)

OR

Government should pass laws to make **ordinary people** protect the environment, even if it interferes with people's rights to make their own decisions ☐ (2)

Can't choose ☐ (8)

1076

b. And which **one** of the following would be closest to your views?

PLEASE TICK **ONE**  
BOX ONLY

Government should let **businesses** decide for themselves how to protect the environment, even if it means they don't always do the right thing ☒ (1)

OR

Government should pass laws to make **businesses** protect the environment, even if it interferes with businesses' rights to make their own decisions ☐ (2)

Can't choose ☐ (8)

1077

16. Some countries are doing more to protect the world environment than other countries are. In general, do you think that **Britain** is doing ...

PLEASE TICK **ONE** BOX ONLY

... more than enough, ☒ (1)  
about the right amount, ☐ (2)  
or, too little? ☐ (3)  
Can't choose ☐ (8)

1078

- 17a. Which of these approaches do you think would be the best way of getting **business and industry** in Britain to protect the environment?

PLEASE TICK **ONE** BOX ONLY

(✓)

- Heavy fines for businesses that damage the environment ☐ (1)
- Use the tax system to reward businesses that protect the environment ☐ (2)
- More information and education for businesses about the advantages of protecting the environment ☐ (3)
- Can't choose ☐ (8)

1079

- b. Which of these approaches do you think would be the best way of getting **people and their families** in Britain to protect the environment?

PLEASE TICK **ONE** BOX ONLY

(✓)

- Heavy fines for people who damage the environment ☐ (1)
- Use the tax system to reward people who protect the environment ☐ (2)
- More information and education for people about the advantages of protecting the environment ☐ (3)
- Can't choose ☐ (8)

1080

18. To which of the following should **Britain** give priority in order to meet its future energy needs?

PLEASE TICK **ONE** BOX ONLY

(✓)

- Coal, oil and natural gas ☐ (1)
- Nuclear power ☐ (2)
- Solar, wind or water power ☐ (3)
- Fuels made from crops ☐ (4)
- None of them ☐ (5)
- Can't choose ☐ (8)

1081

19. How much do you agree or disagree with each of these statements?

| <i>PLEASE TICK <b>ONE</b> BOX<br/>ON EACH LINE</i>                                                                                | <b>Agree<br/>strongly</b> | <b>Agree</b>             | <b>Neither<br/>agree nor<br/>disagree</b> | <b>Disagree</b>          | <b>Disagree<br/>strongly</b> | <b>Can't<br/>choose</b>  |
|-----------------------------------------------------------------------------------------------------------------------------------|---------------------------|--------------------------|-------------------------------------------|--------------------------|------------------------------|--------------------------|
| a. For environmental problems, there should be international agreements that Britain and other countries should be made to follow | <input type="checkbox"/>  | <input type="checkbox"/> | <input type="checkbox"/>                  | <input type="checkbox"/> | <input type="checkbox"/>     | <input type="checkbox"/> |
| b. Poorer countries should be expected to make less effort than richer countries to protect the environment                       | <input type="checkbox"/>  | <input type="checkbox"/> | <input type="checkbox"/>                  | <input type="checkbox"/> | <input type="checkbox"/>     | <input type="checkbox"/> |
| c. Economic progress in Britain will slow down unless we look after the environment better                                        | <input type="checkbox"/>  | <input type="checkbox"/> | <input type="checkbox"/>                  | <input type="checkbox"/> | <input type="checkbox"/>     | <input type="checkbox"/> |
|                                                                                                                                   | (1)                       | (2)                      | (3)                                       | (4)                      | (5)                          | (8)                      |

1082

1083

1084

20a. How often do you make a special effort to **sort glass or tins or plastic or newspapers and so on for recycling?**

*PLEASE TICK **ONE** BOX ONLY*

|                                        |                          |     |
|----------------------------------------|--------------------------|-----|
|                                        | (✓)                      |     |
| Always                                 | <input type="checkbox"/> | (1) |
| Often                                  | <input type="checkbox"/> | (2) |
| Sometimes                              | <input type="checkbox"/> | (3) |
| Never                                  | <input type="checkbox"/> | (4) |
| (Recycling not available where I live) | <input type="checkbox"/> | (8) |

1085

b. How often do you make a special effort to **buy fruit and vegetables grown without pesticides or chemicals?**

*PLEASE TICK **ONE** BOX ONLY*

|                              |                          |     |
|------------------------------|--------------------------|-----|
|                              | (✓)                      |     |
| Always                       | <input type="checkbox"/> | (1) |
| Often                        | <input type="checkbox"/> | (2) |
| Sometimes                    | <input type="checkbox"/> | (3) |
| Never                        | <input type="checkbox"/> | (4) |
| (Not available where I live) | <input type="checkbox"/> | (8) |

1086

20c. And how often do you **cut back on driving a car for environmental reasons?**

PLEASE TICK **ONE** BOX ONLY

- (✓)
- Always ☐ (1)
- Often ☐ (2)
- Sometimes ☐ (3)
- Never ☐ (4)
- (I do not have or cannot drive a car) ☐ (8)

1087

d. How often do you **reduce the energy or fuel you use at home for environmental reasons?**

PLEASE TICK **ONE** BOX ONLY

- (✓)
- Always ☐ (1)
- Often ☐ (2)
- Sometimes ☐ (3)
- Never ☐ (4)

1088

e. And how often do you **choose to save or re-use water for environmental reasons?**

PLEASE TICK **ONE** BOX ONLY

- (✓)
- Always ☐ (1)
- Often ☐ (2)
- Sometimes ☐ (3)
- Never ☐ (4)

1089

f. And how often do you **avoid buying certain products for environmental reasons?**

PLEASE TICK **ONE** BOX ONLY

- (✓)
- Always ☐ (1)
- Often ☐ (2)
- Sometimes ☐ (3)
- Never ☐ (4)

1090

21. Are you a member of any group whose main aim is to preserve or protect the environment?

PLEASE TICK **ONE** BOX ONLY

(✓)  
Yes ☐ (1)  
No ☐ (2)

1091

22. In the last **five years**, have you ...

PLEASE TICK **ONE** BOX ON EACH LINE

| Yes<br>I have            | No<br>I have not         |
|--------------------------|--------------------------|
| <input type="checkbox"/> | <input type="checkbox"/> |
| <input type="checkbox"/> | <input type="checkbox"/> |
| <input type="checkbox"/> | <input type="checkbox"/> |
| (1)                      | (2)                      |

- a. ... signed a petition about an environmental issue?

1092

- b. ... given money to an environmental group?

1093

- c. ... taken part in a protest or demonstration about an environmental issue?

1094

23. For each statement below, just tick the box that comes closest to your opinion of how true it is.

PLEASE TICK **ONE** BOX  
ON EACH LINE

In your opinion, how true is this?

|                                                                            | Definitely<br>true       | Probably<br>true         | Probably<br>not<br>true  | Definitely<br>not<br>true | Can't<br>choose          |
|----------------------------------------------------------------------------|--------------------------|--------------------------|--------------------------|---------------------------|--------------------------|
| a. 'Climate change is caused by a hole in the earth's atmosphere'          | <input type="checkbox"/> | <input type="checkbox"/> | <input type="checkbox"/> | <input type="checkbox"/>  | <input type="checkbox"/> |
| b. 'Every time we use coal or oil or gas, we contribute to climate change' | <input type="checkbox"/> | <input type="checkbox"/> | <input type="checkbox"/> | <input type="checkbox"/>  | <input type="checkbox"/> |
|                                                                            | (1)                      | (2)                      | (3)                      | (4)                       | (8)                      |

1095

1096

24. Some working couples with children find it hard to make ends meet on low wages. In these circumstances, do you think ...

PLEASE TICK **ONE** BOX ONLY

(✓)  
... the government should top-up their wages, ☐ (1)  
... or, is it up to the couple to look after themselves and their children as best they can? ☐ (2)  
Can't choose ☐ (8)

SPARE  
1097-  
1110

1111

25. And what about working couples without children?  
If they find it hard to make ends meet on low wages, do you think ...

PLEASE TICK **ONE** BOX ONLY

(✓)  
... the government should top-up their wages, ☐ (1)  
... or, is it up to the couple to look after themselves as best they can? ☐ (2)  
Can't choose ☐ (8)

1112

26. And what about working lone parents?  
If they find it hard to make ends meet on low wages, do you think ...

PLEASE TICK **ONE** BOX ONLY

- (✓)
- ... the government should top-up their wages, ☐ (1)
- ... or, is it up to the parents to look after themselves and their children as best they can? ☐ (2)
- Can't choose ☐ (8)

1113

- 27a. Consider this situation:

An unemployed person on benefit takes a casual job and is paid in cash. He does not report it to the benefit office and is £500 in pocket. Do you feel this is wrong or not wrong?

PLEASE TICK **ONE** BOX ONLY

- (✓)
- Not wrong ☐ (1)
- A bit wrong ☐ (2)
- Wrong ☐ (3)
- Seriously wrong ☐ (4)
- Can't choose ☐ (8)

1114

- b. And how likely do you think it is that you would do this, if you found yourself in this situation?

PLEASE TICK **ONE** BOX ONLY

- (✓)
- Very likely ☐ (1)
- Fairly likely ☐ (2)
- Not very likely ☐ (3)
- Not at all likely ☐ (4)
- Can't choose ☐ (8)

1115

28. There has been a lot of debate among teachers about how British schools should cater for children whose parents come from other countries and cultures. Do you think in general that schools with many such children should...

SPARE  
1116-  
1160

PLEASE TICK ONLY **ONE** BOX ON EACH LINE

|                                                                                   | Yes                      | No                       |      |
|-----------------------------------------------------------------------------------|--------------------------|--------------------------|------|
| ...Provide them with special classes in English if they require them?             | <input type="checkbox"/> | <input type="checkbox"/> | 1161 |
| Provide them with special religious instruction if their parents request it?      | <input type="checkbox"/> | <input type="checkbox"/> | 1162 |
| Allow those for whom it is important to wear their traditional dress at school?   | <input type="checkbox"/> | <input type="checkbox"/> | 1163 |
| Allow them to study their mother tongue in school hours?                          | <input type="checkbox"/> | <input type="checkbox"/> | 1164 |
| Teach them about the history of their parents' country of origin and its culture? | <input type="checkbox"/> | <input type="checkbox"/> | 1165 |
| Teach <u>all</u> children about the history and cultures of these countries?      | <input type="checkbox"/> | <input type="checkbox"/> | 1166 |
|                                                                                   | (1)                      | (2)                      |      |

- 29 Please tick one box for each of these statements to show how much you agree or disagree.

PLEASE TICK **ONE** BOX  
ON EACH LINE

|                                                                                                                          | Agree<br>strongly        | Agree                    | Neither<br>agree nor<br>disagree | Disagree                 | Disagree<br>strongly     | Can't<br>choose          |      |
|--------------------------------------------------------------------------------------------------------------------------|--------------------------|--------------------------|----------------------------------|--------------------------|--------------------------|--------------------------|------|
| a. Social workers should put the child's interests first, even if it means taking a child away from its natural parents. | <input type="checkbox"/> | <input type="checkbox"/> | <input type="checkbox"/>         | <input type="checkbox"/> | <input type="checkbox"/> | <input type="checkbox"/> | 1167 |
| b. Overall Britain is a good country for children to grow up in.                                                         | <input type="checkbox"/> | <input type="checkbox"/> | <input type="checkbox"/>         | <input type="checkbox"/> | <input type="checkbox"/> | <input type="checkbox"/> | 1168 |
|                                                                                                                          | (1)                      | (2)                      | (3)                              | (4)                      | (5)                      | (8)                      |      |

SPARE  
1169-90

30. From what you know or have heard, please tick a box for each of the items below to show whether you think the National Health Service in your area is, on the whole, satisfactory or in need of improvement.

| PLEASE TICK <b>ONE</b> BOX<br>ON EACH LINE                                                | In need of<br><u>a lot of</u><br>improvement | In need<br>of <u>some</u><br>improvement | Satisfactory             | Very<br>good             |      |
|-------------------------------------------------------------------------------------------|----------------------------------------------|------------------------------------------|--------------------------|--------------------------|------|
| a. GPs' appointment systems                                                               | <input type="checkbox"/>                     | <input type="checkbox"/>                 | <input type="checkbox"/> | <input type="checkbox"/> | 1191 |
| b. Amount of time GP gives to each patient                                                | <input type="checkbox"/>                     | <input type="checkbox"/>                 | <input type="checkbox"/> | <input type="checkbox"/> | 1192 |
| c. Hospital waiting lists for non-emergency operations                                    | <input type="checkbox"/>                     | <input type="checkbox"/>                 | <input type="checkbox"/> | <input type="checkbox"/> | 1193 |
| d. Waiting time before getting appointments with hospital consultants                     | <input type="checkbox"/>                     | <input type="checkbox"/>                 | <input type="checkbox"/> | <input type="checkbox"/> | 1194 |
| e. General condition of hospital building                                                 | <input type="checkbox"/>                     | <input type="checkbox"/>                 | <input type="checkbox"/> | <input type="checkbox"/> | 1195 |
| f. Waiting areas in accident and emergency departments in hospitals                       | <input type="checkbox"/>                     | <input type="checkbox"/>                 | <input type="checkbox"/> | <input type="checkbox"/> | 1196 |
| g. Waiting areas for out-patients in hospitals                                            | <input type="checkbox"/>                     | <input type="checkbox"/>                 | <input type="checkbox"/> | <input type="checkbox"/> | 1197 |
| h. Waiting areas at GPs' surgeries                                                        | <input type="checkbox"/>                     | <input type="checkbox"/>                 | <input type="checkbox"/> | <input type="checkbox"/> | 1198 |
| i. Time spent waiting in out-patient departments                                          | <input type="checkbox"/>                     | <input type="checkbox"/>                 | <input type="checkbox"/> | <input type="checkbox"/> | 1199 |
| j. Time spent waiting in accident and emergency departments before being seen by a doctor | <input type="checkbox"/>                     | <input type="checkbox"/>                 | <input type="checkbox"/> | <input type="checkbox"/> | 1200 |
| k. Time spent waiting for an ambulance after a 999 call                                   | <input type="checkbox"/>                     | <input type="checkbox"/>                 | <input type="checkbox"/> | <input type="checkbox"/> | 1201 |
|                                                                                           | (1)                                          | (2)                                      | (3)                      | (4)                      |      |

31. Please tick one box for each statement to show how much you agree or disagree with it.

| PLEASE TICK <b>ONE</b> BOX<br>ON EACH LINE                                                           | Agree<br>strongly        | Agree                    | Neither<br>agree nor<br>disagree | Disagree                 | Disagree<br>strongly     | Can't<br>choose          |      |
|------------------------------------------------------------------------------------------------------|--------------------------|--------------------------|----------------------------------|--------------------------|--------------------------|--------------------------|------|
| a. I ignore a lot of health problems because I assume that they will get better of their own accord. | <input type="checkbox"/> | <input type="checkbox"/> | <input type="checkbox"/>         | <input type="checkbox"/> | <input type="checkbox"/> | <input type="checkbox"/> | 1202 |
| b. I always seek medical advice if I am at all worried or uncertain about my health.                 | <input type="checkbox"/> | <input type="checkbox"/> | <input type="checkbox"/>         | <input type="checkbox"/> | <input type="checkbox"/> | <input type="checkbox"/> | 1203 |
| c. I keep concerns about my health to myself so as not to make a fuss.                               | <input type="checkbox"/> | <input type="checkbox"/> | <input type="checkbox"/>         | <input type="checkbox"/> | <input type="checkbox"/> | <input type="checkbox"/> | 1204 |
| d. I do everything I can to keep myself healthy.                                                     | <input type="checkbox"/> | <input type="checkbox"/> | <input type="checkbox"/>         | <input type="checkbox"/> | <input type="checkbox"/> | <input type="checkbox"/> | 1205 |
|                                                                                                      | (1)                      | (2)                      | (3)                              | (4)                      | (5)                      | (8)                      |      |

32. Please tick one box to show how much you agree or disagree with the following statement.

| PLEASE TICK <b>ONE</b> BOX ONLY                                                                                       | Agree strongly           | Agree                    | Neither agree nor disagree | Disagree                 | Disagree strongly        | Can't choose             |
|-----------------------------------------------------------------------------------------------------------------------|--------------------------|--------------------------|----------------------------|--------------------------|--------------------------|--------------------------|
| In the end people need to take responsibility for their own health, not rely on their doctor to tell them what to do. | <input type="checkbox"/> | <input type="checkbox"/> | <input type="checkbox"/>   | <input type="checkbox"/> | <input type="checkbox"/> | <input type="checkbox"/> |
|                                                                                                                       | (1)                      | (2)                      | (3)                        | (4)                      | (5)                      | (8)                      |

1206

SPARE  
1207-30

33. There are different ways of paying for road use. One way is to charge people a set amount of road tax regardless of how much they use the roads. Another way is to charge people according to how much they use roads, which roads they use and when they use them.

Please tick one box for each of these statements to show how much you agree or disagree.

| PLEASE TICK <b>ONE</b> BOX ON EACH LINE                                                                               | Agree strongly           | Agree                    | Neither agree nor disagree | Disagree                 | Disagree strongly        | Can't choose             |
|-----------------------------------------------------------------------------------------------------------------------|--------------------------|--------------------------|----------------------------|--------------------------|--------------------------|--------------------------|
| a. People who drive on busy roads should pay <b>more</b> to use the roads than people who drive on quiet roads        | <input type="checkbox"/> | <input type="checkbox"/> | <input type="checkbox"/>   | <input type="checkbox"/> | <input type="checkbox"/> | <input type="checkbox"/> |
| b. People who drive at the <b>busiest</b> times should pay more to use the roads than people who drive at other times | <input type="checkbox"/> | <input type="checkbox"/> | <input type="checkbox"/>   | <input type="checkbox"/> | <input type="checkbox"/> | <input type="checkbox"/> |
| c. People who drive at busy times, only do so because they have no other alternative                                  | <input type="checkbox"/> | <input type="checkbox"/> | <input type="checkbox"/>   | <input type="checkbox"/> | <input type="checkbox"/> | <input type="checkbox"/> |
| d. It is too complicated to charge drivers different amounts depending on when and where they drive                   | <input type="checkbox"/> | <input type="checkbox"/> | <input type="checkbox"/>   | <input type="checkbox"/> | <input type="checkbox"/> | <input type="checkbox"/> |
|                                                                                                                       | (1)                      | (2)                      | (3)                        | (4)                      | (5)                      | (8)                      |

1231

1232

1233

1234

34. Please tick one box for each of these statements to show how much you agree or disagree.

| PLEASE TICK <b>ONE</b> BOX ON EACH LINE                                                                             | Agree strongly           | Agree                    | Neither agree nor disagree | Disagree                 | Disagree strongly        | I never/ rarely travel by car for less than 2 miles | Can't choose             |
|---------------------------------------------------------------------------------------------------------------------|--------------------------|--------------------------|----------------------------|--------------------------|--------------------------|-----------------------------------------------------|--------------------------|
| a. Many of the journeys of less than two miles that I now make by car I could just as easily walk                   | <input type="checkbox"/> | <input type="checkbox"/> | <input type="checkbox"/>   | <input type="checkbox"/> | <input type="checkbox"/> | <input type="checkbox"/>                            | <input type="checkbox"/> |
| b. Many of the journeys of less than two miles that I now make by car I could just as easily go by bus              | <input type="checkbox"/> | <input type="checkbox"/> | <input type="checkbox"/>   | <input type="checkbox"/> | <input type="checkbox"/> | <input type="checkbox"/>                            | <input type="checkbox"/> |
| c. Many of the journeys of less than two miles that I now make by car I could just as easily cycle, if I had a bike | <input type="checkbox"/> | <input type="checkbox"/> | <input type="checkbox"/>   | <input type="checkbox"/> | <input type="checkbox"/> | <input type="checkbox"/>                            | <input type="checkbox"/> |
|                                                                                                                     | (1)                      | (2)                      | (3)                        | (4)                      | (5)                      | (6)                                                 | (8)                      |

1235

1236

1237

35. How many journeys of less than two miles do you make by car in a typical week?

**PLEASE WRITE IN:**

 

1238-9

Or tick here if you never travel by car

☐

(97)

36. Now some questions about air travel. Please tick one box for each statement to show how much you agree or disagree.

|                                                                                                                                              | <b>Agree<br/>strongly</b> | <b>Agree</b>             | <b>Neither<br/>agree nor<br/>disagree</b> | <b>Disagree</b>          | <b>Disagree<br/>strongly</b> | <b>Can't<br/>choose</b>  |
|----------------------------------------------------------------------------------------------------------------------------------------------|---------------------------|--------------------------|-------------------------------------------|--------------------------|------------------------------|--------------------------|
| <b>PLEASE TICK <i>ONE</i> BOX<br/>ON EACH LINE</b>                                                                                           |                           |                          |                                           |                          |                              |                          |
| a. People should be able to travel by plane as much as they like                                                                             | <input type="checkbox"/>  | <input type="checkbox"/> | <input type="checkbox"/>                  | <input type="checkbox"/> | <input type="checkbox"/>     | <input type="checkbox"/> |
| b. People should be able to travel by plane as much as they like, even if new terminals or runways are needed to meet the demand             | <input type="checkbox"/>  | <input type="checkbox"/> | <input type="checkbox"/>                  | <input type="checkbox"/> | <input type="checkbox"/>     | <input type="checkbox"/> |
| c. People should be able to travel by plane as much as they like, even if this harms the environment                                         | <input type="checkbox"/>  | <input type="checkbox"/> | <input type="checkbox"/>                  | <input type="checkbox"/> | <input type="checkbox"/>     | <input type="checkbox"/> |
| d. The price of a plane ticket should reflect the environmental damage that flying causes, even if this makes air travel much more expensive | <input type="checkbox"/>  | <input type="checkbox"/> | <input type="checkbox"/>                  | <input type="checkbox"/> | <input type="checkbox"/>     | <input type="checkbox"/> |
|                                                                                                                                              | (1)                       | (2)                      | (3)                                       | (4)                      | (5)                          | (8)                      |

1240

1241

1242

1243

37. Please tick one box for each of these statements to show how much you agree or disagree.

| PLEASE TICK <b>ONE</b> BOX<br>ON EACH LINE                                                                                                               | Agree<br>strongly        | Agree                    | Neither<br>agree nor<br>disagree | Disagree                 | Disagree<br>strongly     | Can't<br>choose          |                        |
|----------------------------------------------------------------------------------------------------------------------------------------------------------|--------------------------|--------------------------|----------------------------------|--------------------------|--------------------------|--------------------------|------------------------|
| a. For the sake of the environment, car users should pay higher taxes                                                                                    | <input type="checkbox"/> | <input type="checkbox"/> | <input type="checkbox"/>         | <input type="checkbox"/> | <input type="checkbox"/> | <input type="checkbox"/> | 1244                   |
| b. The government should build more motorways to reduce traffic congestion                                                                               | <input type="checkbox"/> | <input type="checkbox"/> | <input type="checkbox"/>         | <input type="checkbox"/> | <input type="checkbox"/> | <input type="checkbox"/> | 1245                   |
| c. Building more roads just encourages more traffic                                                                                                      | <input type="checkbox"/> | <input type="checkbox"/> | <input type="checkbox"/>         | <input type="checkbox"/> | <input type="checkbox"/> | <input type="checkbox"/> | 1246                   |
| d. People should be allowed to use their cars as much as they like, even if it causes damage to the environment                                          | <input type="checkbox"/> | <input type="checkbox"/> | <input type="checkbox"/>         | <input type="checkbox"/> | <input type="checkbox"/> | <input type="checkbox"/> | 1247                   |
| e. For the sake of the environment everyone should reduce how much they use their cars                                                                   | <input type="checkbox"/> | <input type="checkbox"/> | <input type="checkbox"/>         | <input type="checkbox"/> | <input type="checkbox"/> | <input type="checkbox"/> | 1248                   |
| f. Anyone who thinks that reducing their own car use will help the environment is wrong – one person doesn't make any difference                         | <input type="checkbox"/> | <input type="checkbox"/> | <input type="checkbox"/>         | <input type="checkbox"/> | <input type="checkbox"/> | <input type="checkbox"/> | 1249                   |
| g. People who drive cars that are better for the environment should pay less to use the roads than people whose cars are more harmful to the environment | <input type="checkbox"/> | <input type="checkbox"/> | <input type="checkbox"/>         | <input type="checkbox"/> | <input type="checkbox"/> | <input type="checkbox"/> | 1250                   |
|                                                                                                                                                          | (1)                      | (2)                      | (3)                              | (4)                      | (5)                      | (8)                      | SPARE<br>1251-<br>1300 |

38. Suppose a newly-married young couple, both with steady jobs, asked your advice about whether to buy or rent a home. If they had the choice, what would you advise them to do?

PLEASE TICK **ONE** BOX ONLY

(✓)

To buy a home as soon as possible ☐ (1)

To wait a bit, then try to buy a home ☐ (2)

Not to plan to buy a home at all ☐ (3)

Can't choose ☐ (8)

1301

39. Still thinking of what you might say to this young couple, please tick one box for each statement below to show how much you agree or disagree with it.

**PLEASE TICK ONE  
BOX ON EACH LINE**

|                                                                                   | <b>Agree<br/>strongly</b> | <b>Just<br/>agree</b>    | <b>Neither<br/>agree nor<br/>disagree</b> | <b>Just<br/>disagree</b> | <b>Disagree<br/>strongly</b> |      |
|-----------------------------------------------------------------------------------|---------------------------|--------------------------|-------------------------------------------|--------------------------|------------------------------|------|
| a. Owning your home can be a risky investment                                     | <input type="checkbox"/>  | <input type="checkbox"/> | <input type="checkbox"/>                  | <input type="checkbox"/> | <input type="checkbox"/>     | 1302 |
| b. Over time, buying a home works out less expensive than paying rent             | <input type="checkbox"/>  | <input type="checkbox"/> | <input type="checkbox"/>                  | <input type="checkbox"/> | <input type="checkbox"/>     | 1303 |
| c. Owning your home makes it easier to move when you want to                      | <input type="checkbox"/>  | <input type="checkbox"/> | <input type="checkbox"/>                  | <input type="checkbox"/> | <input type="checkbox"/>     | 1304 |
| d. Owning a home ties up money you may need urgently for other things             | <input type="checkbox"/>  | <input type="checkbox"/> | <input type="checkbox"/>                  | <input type="checkbox"/> | <input type="checkbox"/>     | 1305 |
| e. Owning a home gives you the freedom to do what you want to it                  | <input type="checkbox"/>  | <input type="checkbox"/> | <input type="checkbox"/>                  | <input type="checkbox"/> | <input type="checkbox"/>     | 1306 |
| <hr/>                                                                             |                           |                          |                                           |                          |                              |      |
| f. Owning a home is a big financial burden to repair and maintain                 | <input type="checkbox"/>  | <input type="checkbox"/> | <input type="checkbox"/>                  | <input type="checkbox"/> | <input type="checkbox"/>     | 1307 |
| g. Your own home will be something to leave your family                           | <input type="checkbox"/>  | <input type="checkbox"/> | <input type="checkbox"/>                  | <input type="checkbox"/> | <input type="checkbox"/>     | 1308 |
| h. Owning a home is just too much of a responsibility                             | <input type="checkbox"/>  | <input type="checkbox"/> | <input type="checkbox"/>                  | <input type="checkbox"/> | <input type="checkbox"/>     | 1309 |
| i. Owning a home is too much of a risk for couples without secure jobs            | <input type="checkbox"/>  | <input type="checkbox"/> | <input type="checkbox"/>                  | <input type="checkbox"/> | <input type="checkbox"/>     | 1310 |
| j. Couples who buy their own homes would be wise to wait before starting a family | <input type="checkbox"/>  | <input type="checkbox"/> | <input type="checkbox"/>                  | <input type="checkbox"/> | <input type="checkbox"/>     | 1311 |
|                                                                                   | (1)                       | (2)                      | (3)                                       | (4)                      | (5)                          |      |

SPARE  
1312-30

- 40 Please tick one box for this statement to show how much you agree or disagree.

**PLEASE TICK ONE BOX ONLY**

|                                                                   | <b>Agree<br/>strongly</b> | <b>Agree</b>             | <b>Neither<br/>agree nor<br/>disagree</b> | <b>Disagree</b>          | <b>Disagree<br/>strongly</b> | <b>Can't<br/>choose</b>  |      |
|-------------------------------------------------------------------|---------------------------|--------------------------|-------------------------------------------|--------------------------|------------------------------|--------------------------|------|
| Parents should have a basic right to choose their child's school. | <input type="checkbox"/>  | <input type="checkbox"/> | <input type="checkbox"/>                  | <input type="checkbox"/> | <input type="checkbox"/>     | <input type="checkbox"/> | 1331 |
|                                                                   | (1)                       | (2)                      | (3)                                       | (4)                      | (5)                          | (8)                      |      |

41 Thinking about the choices parents make for their children's schooling, please tick one box for each of these statements to show how much you agree or disagree.

| <i>PLEASE TICK <b>ONE</b> BOX<br/>ON EACH LINE</i>                                                                                                                           | <b>Agree<br/>strongly</b> | <b>Agree</b>             | <b>Neither<br/>agree nor<br/>disagree</b> | <b>Disagree</b>          | <b>Disagree<br/>strongly</b> | <b>Can't<br/>choose</b>  |      |
|------------------------------------------------------------------------------------------------------------------------------------------------------------------------------|---------------------------|--------------------------|-------------------------------------------|--------------------------|------------------------------|--------------------------|------|
| a. In Britain today, parents have a duty to choose the best possible school for their child, even if this means schools in the local area might suffer.                      | <input type="checkbox"/>  | <input type="checkbox"/> | <input type="checkbox"/>                  | <input type="checkbox"/> | <input type="checkbox"/>     | <input type="checkbox"/> | 1332 |
| b. On the whole, when parents don't send their children to the nearest state school it undermines local community                                                            | <input type="checkbox"/>  | <input type="checkbox"/> | <input type="checkbox"/>                  | <input type="checkbox"/> | <input type="checkbox"/>     | <input type="checkbox"/> | 1333 |
| c. In Britain today, when parents don't send their children to the nearest state school, it has harmful effects on that school and the children who go there.                | <input type="checkbox"/>  | <input type="checkbox"/> | <input type="checkbox"/>                  | <input type="checkbox"/> | <input type="checkbox"/>     | <input type="checkbox"/> | 1334 |
| d. Unless other families do the same, there is no point in an individual family thinking about possible effects on local schools and communities when making school choices. | <input type="checkbox"/>  | <input type="checkbox"/> | <input type="checkbox"/>                  | <input type="checkbox"/> | <input type="checkbox"/>     | <input type="checkbox"/> | 1335 |
|                                                                                                                                                                              | (1)                       | (2)                      | (3)                                       | (4)                      | (5)                          | (8)                      |      |

42. And here are some priorities for our schools.  
Which do you think it is most important for them to achieve?

*PLEASE TICK **ONE** BOX ONLY*

(✓)

Make sure all children, however able they are, do the best they can ☐ (1)

Make sure that parents have a lot of choice about the kind of school their child goes to ☐ (2)

Get the number of children who leave school with no qualifications down as low as possible ☐ (3)

Make sure that children from poor backgrounds do as well as those from better off backgrounds ☐ (4)

Can't choose ☐ (8)

43. Now please think about a school where more parents have asked for a place for their children than there are places available.  
Which of these options do you think would be the best way of deciding which children should go to that school?

*PLEASE TICK **ONE** BOX ONLY*

(✓)

Give priority to those children who live closest to the school ☐ (1)

Allow the school to choose which children to admit ☐ (2)

Hold a ballot to select at random which children to admit ☐ (3)

Can't choose ☐ (8)

44. Are you currently in paid work for at least 10 hours a week?

PLEASE TICK **ONE** BOX ONLY

(✓)

Yes ☐ → PLEASE ANSWER QUESTION 45 (1)

No ☐ → PLEASE GO TO QUESTION 49 ON PAGE 26 (2)

1411

**PLEASE ANSWER IF YOU ARE CURRENTLY IN PAID WORK FOR AT LEAST 10 HOURS A WEEK**

45. Are you an employee or self-employed?  
(If you have several jobs, please answer about your main job.)

PLEASE TICK **ONE** BOX ONLY

(✓)

Employee ☐ → PLEASE ANSWER QUESTIONS 46 to 48 (1)

Self-employed ☐ → PLEASE GO TO QUESTION 49 ON PAGE 26 (2)

1412

**PLEASE ANSWER QUESTIONS 46 – 48 IF YOU ARE AN EMPLOYEE**

46. Do you agree, or disagree, with the following statement about working at your present workplace?

PLEASE TICK **ONE** BOX

|                                                                             | Agree<br>strongly        | Agree                    | Neither<br>agree nor<br>disagree | Disagree                 | Disagree<br>strongly     | Can't<br>choose          |
|-----------------------------------------------------------------------------|--------------------------|--------------------------|----------------------------------|--------------------------|--------------------------|--------------------------|
| I feel there will be a job for me where I work now for as long as I want it | <input type="checkbox"/> | <input type="checkbox"/> | <input type="checkbox"/>         | <input type="checkbox"/> | <input type="checkbox"/> | <input type="checkbox"/> |
|                                                                             | (1)                      | (2)                      | (3)                              | (4)                      | (5)                      | (8)                      |

1413

47. Thinking now about the management at your workplace. To what extent do you agree or disagree with the following?

PLEASE TICK **ONE** BOX  
ON EACH LINE

|                                                                 | Agree<br>strongly        | Agree                    | Neither<br>agree nor<br>disagree | Disagree                 | Disagree<br>strongly     | Can't<br>choose          |
|-----------------------------------------------------------------|--------------------------|--------------------------|----------------------------------|--------------------------|--------------------------|--------------------------|
| Management at my workplace ...                                  |                          |                          |                                  |                          |                          |                          |
| a. ... can be relied upon to keep their promises                | <input type="checkbox"/> | <input type="checkbox"/> | <input type="checkbox"/>         | <input type="checkbox"/> | <input type="checkbox"/> | <input type="checkbox"/> |
| b. ... are sincere in attempting to understand employees' views | <input type="checkbox"/> | <input type="checkbox"/> | <input type="checkbox"/>         | <input type="checkbox"/> | <input type="checkbox"/> | <input type="checkbox"/> |
| c. ... deal with employees honestly                             | <input type="checkbox"/> | <input type="checkbox"/> | <input type="checkbox"/>         | <input type="checkbox"/> | <input type="checkbox"/> | <input type="checkbox"/> |
|                                                                 | (1)                      | (2)                      | (3)                              | (4)                      | (5)                      | (8)                      |

1414

1415

1416

- 48 Different people will have different preferred approaches when they experience problems with their rights at work. These might include problems with being paid the right amount, with their holiday entitlement or hours of work or being treated unfairly or unlawfully by management or co-workers. How much do you agree or disagree with each of the following statements about how you might respond to such problems?

| PLEASE TICK <b>ONE</b> BOX<br>ON EACH LINE                                  | Strongly<br>agree        | Agree                    | Neither<br>agree nor<br>disagree | Disagree                 | Strongly<br>disagree     | Can't<br>choose          |      |
|-----------------------------------------------------------------------------|--------------------------|--------------------------|----------------------------------|--------------------------|--------------------------|--------------------------|------|
| a. I would put my view across firmly                                        | <input type="checkbox"/> | <input type="checkbox"/> | <input type="checkbox"/>         | <input type="checkbox"/> | <input type="checkbox"/> | <input type="checkbox"/> | 1417 |
| b. I would try to find a solution that suits everyone involved.             | <input type="checkbox"/> | <input type="checkbox"/> | <input type="checkbox"/>         | <input type="checkbox"/> | <input type="checkbox"/> | <input type="checkbox"/> | 1418 |
| c. I would wait for someone else to raise the issue.                        | <input type="checkbox"/> | <input type="checkbox"/> | <input type="checkbox"/>         | <input type="checkbox"/> | <input type="checkbox"/> | <input type="checkbox"/> | 1419 |
| d. I would try to win my argument.                                          | <input type="checkbox"/> | <input type="checkbox"/> | <input type="checkbox"/>         | <input type="checkbox"/> | <input type="checkbox"/> | <input type="checkbox"/> | 1420 |
| e. I would expect to win some points and to lose others.                    | <input type="checkbox"/> | <input type="checkbox"/> | <input type="checkbox"/>         | <input type="checkbox"/> | <input type="checkbox"/> | <input type="checkbox"/> | 1421 |
| f. I would avoid confrontation at all costs.                                | <input type="checkbox"/> | <input type="checkbox"/> | <input type="checkbox"/>         | <input type="checkbox"/> | <input type="checkbox"/> | <input type="checkbox"/> | 1422 |
| g. I wouldn't mind being confrontational                                    | <input type="checkbox"/> | <input type="checkbox"/> | <input type="checkbox"/>         | <input type="checkbox"/> | <input type="checkbox"/> | <input type="checkbox"/> | 1423 |
| h. I would go for the middle ground rather than all out for what I want.    | <input type="checkbox"/> | <input type="checkbox"/> | <input type="checkbox"/>         | <input type="checkbox"/> | <input type="checkbox"/> | <input type="checkbox"/> | 1424 |
| i. I would rather put up with the problem than get involved in an argument. | <input type="checkbox"/> | <input type="checkbox"/> | <input type="checkbox"/>         | <input type="checkbox"/> | <input type="checkbox"/> | <input type="checkbox"/> | 1425 |
|                                                                             | (1)                      | (2)                      | (3)                              | (4)                      | (5)                      | (8)                      |      |

### EVERYONE PLEASE ANSWER

49. Please tick one box for each statement below to show how much you agree or disagree with it.

| PLEASE TICK <b>ONE</b> BOX<br>ON EACH LINE                                              | Agree<br>strongly        | Agree                    | Neither<br>agree nor<br>disagree | Disagree                 | Disagree<br>strongly     | Can't<br>choose          |      |
|-----------------------------------------------------------------------------------------|--------------------------|--------------------------|----------------------------------|--------------------------|--------------------------|--------------------------|------|
| a. People from ethnic minorities take jobs away from other people in Britain            | <input type="checkbox"/> | <input type="checkbox"/> | <input type="checkbox"/>         | <input type="checkbox"/> | <input type="checkbox"/> | <input type="checkbox"/> | 1740 |
| b. People who come here from Eastern Europe take jobs away from other people in Britain | <input type="checkbox"/> | <input type="checkbox"/> | <input type="checkbox"/>         | <input type="checkbox"/> | <input type="checkbox"/> | <input type="checkbox"/> | 1741 |
|                                                                                         | (1)                      | (2)                      | (3)                              | (4)                      | (5)                      | (8)                      |      |

50. Please tick one box for each statement to show how much you agree or disagree with it.

PLEASE TICK **ONE** BOX  
ON EACH LINE

|                                                                                                              | Agree<br>strongly        | Agree                    | Neither<br>agree nor<br>disagree | Disagree                 | Disagree<br>strongly     |      |
|--------------------------------------------------------------------------------------------------------------|--------------------------|--------------------------|----------------------------------|--------------------------|--------------------------|------|
| a. The welfare state encourages people to stop helping each other                                            | <input type="checkbox"/> | <input type="checkbox"/> | <input type="checkbox"/>         | <input type="checkbox"/> | <input type="checkbox"/> | 1907 |
| b. The government should spend more money on welfare benefits for the poor, even if it leads to higher taxes | <input type="checkbox"/> | <input type="checkbox"/> | <input type="checkbox"/>         | <input type="checkbox"/> | <input type="checkbox"/> | 1908 |
| c. Around here, most unemployed people could find a job if they really wanted one                            | <input type="checkbox"/> | <input type="checkbox"/> | <input type="checkbox"/>         | <input type="checkbox"/> | <input type="checkbox"/> | 1909 |
| d. Many people who get social security don't really deserve any help                                         | <input type="checkbox"/> | <input type="checkbox"/> | <input type="checkbox"/>         | <input type="checkbox"/> | <input type="checkbox"/> | 1910 |
| e. Most people on the dole are fiddling in one way or another                                                | <input type="checkbox"/> | <input type="checkbox"/> | <input type="checkbox"/>         | <input type="checkbox"/> | <input type="checkbox"/> | 1911 |
| f. If welfare benefits weren't so generous, people would learn to stand on their own two feet                | <input type="checkbox"/> | <input type="checkbox"/> | <input type="checkbox"/>         | <input type="checkbox"/> | <input type="checkbox"/> | 1912 |
| g. Cutting welfare benefits would damage too many people's lives                                             | <input type="checkbox"/> | <input type="checkbox"/> | <input type="checkbox"/>         | <input type="checkbox"/> | <input type="checkbox"/> | 1913 |
| h. The creation of the welfare state is one of Britain's proudest achievements                               | <input type="checkbox"/> | <input type="checkbox"/> | <input type="checkbox"/>         | <input type="checkbox"/> | <input type="checkbox"/> | 1914 |
|                                                                                                              | (1)                      | (2)                      | (3)                              | (4)                      | (5)                      |      |

51. Please tick one box for each statement below to show how much you agree or disagree with it.

PLEASE TICK **ONE** BOX  
ON EACH LINE

|                                                                                             | Agree<br>strongly        | Agree                    | Neither<br>agree nor<br>disagree | Disagree                 | Disagree<br>strongly     |               |
|---------------------------------------------------------------------------------------------|--------------------------|--------------------------|----------------------------------|--------------------------|--------------------------|---------------|
| a. Government should redistribute income from the better-off to those who are less well off | <input type="checkbox"/> | <input type="checkbox"/> | <input type="checkbox"/>         | <input type="checkbox"/> | <input type="checkbox"/> | 1915          |
| b. Big business benefits owners at the expense of workers                                   | <input type="checkbox"/> | <input type="checkbox"/> | <input type="checkbox"/>         | <input type="checkbox"/> | <input type="checkbox"/> | 1916          |
| c. Ordinary working people do not get their fair share of the nation's wealth               | <input type="checkbox"/> | <input type="checkbox"/> | <input type="checkbox"/>         | <input type="checkbox"/> | <input type="checkbox"/> | 1917          |
| d. There is one law for the rich and one for the poor                                       | <input type="checkbox"/> | <input type="checkbox"/> | <input type="checkbox"/>         | <input type="checkbox"/> | <input type="checkbox"/> | 1918          |
| e. Management will always try to get the better of employees if it gets the chance          | <input type="checkbox"/> | <input type="checkbox"/> | <input type="checkbox"/>         | <input type="checkbox"/> | <input type="checkbox"/> | 1919          |
|                                                                                             | (1)                      | (2)                      | (3)                              | (4)                      | (5)                      | SPARE<br>1920 |

52. Please tick one box for each statement below to show how much you agree or disagree with it.

PLEASE TICK **ONE** BOX  
ON EACH LINE

|                                                                                 | Agree<br>strongly        | Agree                    | Neither<br>agree nor<br>disagree | Disagree                 | Disagree<br>strongly     |                  |
|---------------------------------------------------------------------------------|--------------------------|--------------------------|----------------------------------|--------------------------|--------------------------|------------------|
| a. Young people today don't have enough respect for traditional British values. | <input type="checkbox"/> | <input type="checkbox"/> | <input type="checkbox"/>         | <input type="checkbox"/> | <input type="checkbox"/> | 1921             |
| b. People who break the law should be given stiffer sentences.                  | <input type="checkbox"/> | <input type="checkbox"/> | <input type="checkbox"/>         | <input type="checkbox"/> | <input type="checkbox"/> | 1922             |
| c. For some crimes, the death penalty is the most appropriate sentence.         | <input type="checkbox"/> | <input type="checkbox"/> | <input type="checkbox"/>         | <input type="checkbox"/> | <input type="checkbox"/> | 1923             |
| d. Schools should teach children to obey authority.                             | <input type="checkbox"/> | <input type="checkbox"/> | <input type="checkbox"/>         | <input type="checkbox"/> | <input type="checkbox"/> | 1924             |
| e. The law should always be obeyed, even if a particular law is wrong.          | <input type="checkbox"/> | <input type="checkbox"/> | <input type="checkbox"/>         | <input type="checkbox"/> | <input type="checkbox"/> | 1925             |
| f. Censorship of films and magazines is necessary to uphold moral standards.    | <input type="checkbox"/> | <input type="checkbox"/> | <input type="checkbox"/>         | <input type="checkbox"/> | <input type="checkbox"/> | 1926             |
|                                                                                 | (1)                      | (2)                      | (3)                              | (4)                      | (5)                      | SPARE<br>1927-49 |

53a. To help us plan better in future, please tell us about how long it took you to complete this questionnaire.

PLEASE TICK **ONE** BOX ONLY

(✓)

|                           |                          |     |
|---------------------------|--------------------------|-----|
| Less than 15 minutes      | <input type="checkbox"/> | (1) |
| Between 15 and 20 minutes | <input type="checkbox"/> | (2) |
| Between 21 and 30 minutes | <input type="checkbox"/> | (3) |
| Between 31 and 45 minutes | <input type="checkbox"/> | (4) |
| Between 46 and 60 minutes | <input type="checkbox"/> | (5) |
| Over one hour             | <input type="checkbox"/> | (6) |

b. And on what date did you fill in the questionnaire?

PLEASE WRITE IN:

 

DATE

 

MONTH

2010

1951-54

54. And lastly just a few details about yourself.

a. Are you ....

(✓)

Male

☐

(1)

Female

☐

(2)

1955

b. What was your age last birthday?

PLEASE WRITE IN:

 

YEARS

1956-57

***IF YOU HAVE ANY OTHER COMMENTS YOU WISH TO MAKE, PLEASE USE THIS SPACE:***

**Thank you very much for your help**

1958-72

Please keep the completed questionnaire for the interviewer if he or she has arranged to call for it. Otherwise, please post it as soon as possible in the pre-paid envelope provided.

CONFIDENTIAL

# BRITISH SOCIAL ATTITUDES 2010 DOCUMENTATION OF THE BLAISE QUESTIONNAIRE

## Notes:

1. This is a documentation of the Blaise program. Not all variables that appear here are on the SPSS file. (Those that are not are marked with a '\$'). Similarly, not all derived variables that are on the SPSS file are mentioned here. See also separate documentation of derived variables.
2. Unless otherwise specified, 'Don't Know' is code 8 for single column questions, code 98 for two column questions, and so on.
3. Unless otherwise specified, 'Refusal/Not answered' is code 9 for single column questions, code 99 for two column questions, and so on. Where there is an explicit 'Refusal' code (usually code 7 or 97), then code 9 (or 99 and so on) is reserved for 'Not answered' only.
4. Sections in brackets and italics were textfilled as appropriate on the interviewers' computers.
5. Routing instructions appear above the questions. A routing instruction should be considered to stay in force until the next routing instruction.
6. '(NOT ON SCREEN)' means that the question did not appear on the interviewers' or editors' screens. '(EDIT ONLY)' means it appeared on screen for the editors but not the interviewers. Individual codes marked 'EDIT ONLY' were used by the editors to reclassify 'other' answers.

**P2985**

**Sep 2011**

**Content:**

|                                            |     |
|--------------------------------------------|-----|
| Introduction                               | 3   |
| Household grid                             | 7   |
| Newspaper readership and internet          | 17  |
| Party identification                       | 21  |
| Public spending and social welfare         | 24  |
| Education                                  | 36  |
| Health                                     | 42  |
| Transport                                  | 49  |
| Housing                                    | 53  |
| School choice (versions A and B)           | 65  |
| Higher Education (version C)               | 70  |
| Respondent's job details                   | 74  |
| Employment                                 | 85  |
| Employment Relations                       | 85  |
| Politics (version C)                       | 95  |
| Political and social attitudes (version C) | 100 |
| Classification (all versions)              | 101 |
| Education                                  | 108 |
| Spouse's job details                       | 112 |
| Income and benefits                        | 120 |
| End bit                                    | 125 |
| Admin block                                | 128 |

## Introduction

- ASK ALL**
- Q1 [SerialNo] <sup>1</sup>  
Serial Number  
Range: 210001 ... 999997
- Q2 [EdDoneV] \$ **(EDIT ONLY)**  
For edit  
1 Yes  
2 No
- Q3 [SOCDo] \$ **(EDIT ONLY)**  
Any SOC coding to complete?  
1 Yes  
2 No
- Q4 [BackDo] \$ **(EDIT ONLY)**  
Any Back coding to complete?  
1 Yes  
2 No
- Q5 [QVersion] \$ **(EDIT ONLY)**  
Version  
Range: 1 ... 97
- Q6 [EdVersion] \$ **(EDIT ONLY)**  
Edit Version  
Range: 1 ... 97
- Q7 [EditQ] \$  
Edit qre?  
1 Yes  
2 No
- Q8 [Issue\_Num] \$  
ISSUE NUMBER  
Range: 0 ... 7
- Q9 [Point] <sup>2</sup>  
Sample point  
Range: 1 ... 997
- Q10 [SmpReg] \$  
SAMPLE REGION 2002 version  
1 NORTH  
2 YORKS AND HUMBERSIDE  
3 EAST MIDLANDS  
4 EAST ANGLIA  
5 SOUTH EAST (excl. Greater London)  
6 SOUTH WEST  
7 WEST MIDLANDS  
8 NORTH WEST  
9 WALES  
10 SCOTLAND  
11 GREATER LONDON

---

<sup>1</sup> Called [Serial] on SPSS file. Scrambled.

<sup>2</sup> Called [SPoint] on SPSS file.

Q11 [StRegion] \$  
dv  
Range: 1 ... 97

Q12 [Region] \$  
dv  
Range: 1 ... 7

Q13 [PopDen] \$  
Pop density  
Range: 0 ... 9997

Q14 [PopBand] \$  
Population Density Quartiles dv  
Range: 1 ... 4

Q15 [PerOO] \$  
Percentage owner occupied  
Range: 0 ... 997

Q16 [PerSEG] \$  
Percentage SEG non-manual  
Range: 0 ... 997

Q17 [DPs] \$  
Range: 0 ... 9997

Q18 [GOR]<sup>3</sup>  
Government office region 2003 version

|    |                          |
|----|--------------------------|
| 1  | North East               |
| 2  | North West               |
| 3  | Yorkshire and Humberside |
| 4  | East Midlands            |
| 5  | West Midlands            |
| 6  | SW                       |
| 7  | Eastern                  |
| 8  | Inner London             |
| 9  | Outer London             |
| 10 | South East               |
| 11 | Wales                    |
| 12 | Scotland                 |

Q19 [EDCode] \$  
ED code  
Open Question (Maximum of 9 characters)

Q20 [LACode] \$  
LA code  
Open Question (Maximum of 6 characters)

Q21 [CounCode] \$  
Council area code  
Open Question (Maximum of 2 characters)

Q22 [ConCode] \$  
Parliamentary constituency code  
Open Question (Maximum of 60 characters)

---

<sup>3</sup> Called [GOR2] on SPSS file.

Q23 [Ward] \$  
Ward code  
Open Question (Maximum of 7 characters)

Q24 [MOI] \$  
MOI  
Range: 1 ... 97

Q25 [WtFactor] (NOT ON SCREEN)  
Final BSA weight  
Range: 0.0 ... 99.0

Q26 [OldWt] <sup>4</sup> (NOT ON SCREEN)  
scaled DU and person selection weight. For compatibility pre 2005  
Range: 0 ... 99.0

Q27 [ISel] \$  
Individual selection digits  
Open Question (Maximum of 11 characters)

Q28 [GOR\_ID] \$  
2007 version : Government office region

|    |                            |
|----|----------------------------|
| 1  | A North East               |
| 2  | B North West               |
| 3  | D Yorkshire and The Humber |
| 4  | E East Midlands            |
| 5  | F West Midlands            |
| 6  | G East of England          |
| 7  | H London                   |
| 8  | J South East               |
| 9  | K South West               |
| 10 | L Wales                    |
| 11 | M Scotland                 |

Q30 [ABCVer] (NOT ON SCREEN)  
A, B or C?

|   |   |
|---|---|
| 1 | A |
| 2 | B |
| 3 | C |

Q31 [Country]  
England, Scotland or Wales?

|   |          |
|---|----------|
| 1 | England  |
| 2 | Scotland |
| 3 | Wales    |

Q32 [XYVer]  
Version X/Y for filtering  
Range: 1 ... 7

Q33 [OddEven] \$  
1=Odd 2=Even  
Range: 1 ... 7

Q34 [XYComp] \$  
XYVer computed - marker

|   |     |
|---|-----|
| 1 | Yes |
| 2 | No  |

---

<sup>4</sup> Included for compatibility with BSA before 2005. [WtFactor] should be used for weighting, but check analysis of time series running before 2005 using [OldWt].

Q35      [AdrCheck] \$  
Address check indicator.  
1        Triggered  
2        Satisfied

Q36      [AdrField] \$  
PLEASE ENTER THE FIRST TEN CHARACTERS OF THE FIRST LINE OF THE ADDRESS  
TAKEN FROM A.R.F. ADDRESS LABEL.  
MAKE SURE TO TYPE IT EXACTLY AS IT IS PRINTED.  
Open Question (Maximum of 10 characters)

Q37      [IntDate] \$  
INTERVIEWER: Check Date of Interview and alter if not correct  
Date

Q38      [SIntDate] \$  
Computer IntDate  
Date

Q39      [StTIM]  
Start time  
Time

Q41      [BStart] \$  
1        Press 1 and <Enter> to continue.

Q42      [BTime] \$ **(NOT ON SCREEN)**  
Start time of grid block  
Range: 0 ... 1440

## Household grid

### ASK ALL

Q43 [RespName]  
(Can I just check, what is your first name?)  
PLEASE TYPE IN THE FIRST NAME (OR INITIALS) OF RESPONDENT  
Open Question (Maximum of 10 characters)

Q44 [RespSex] \$  
  
PLEASE CODE SEX OF RESPONDENT  
1 Male  
2 Female

Q45 [RespAge] \$  
  
What was your **age** last birthday?  
  
FOR 97+, CODE 97.

Range: 0 ... 97  
98 (Don't know)  
99 (Refusal)

Q46 [Househld] \$  
  
Thinking now of **everyone** living in this household, **including children**:  
  
**Including yourself**, how many people live here regularly as members of this **household**?  
  
CHECK INTERVIEWER MANUAL FOR DEFINITION OF HOUSEHOLD IF NECESSARY.  
NOTE THAT THIS MAY BE **DIFFERENT** TO THE DWELLING UNIT YOU ENUMERATED FOR THE SELECTION.

IF YOU DISCOVER THAT YOU WERE GIVEN THE WRONG INFORMATION FOR THE RESPONDENT SELECTION ON THE ARF:  
\*DO NOT REDO THE ARF SELECTION PROCEDURE  
\*DO ENTER THE CORRECT INFORMATION HERE  
\*DO USE <CTRL + M> TO MAKE A NOTE OF WHAT HAPPENED.

Range: 1 ... 15

Q47/Q53/Q59/Q65/Q71/Q77/Q83/Q89/Q95/Q101/Q107/Q113/Q119/Q125/Q131

**FOR EACH PERSON AT [Househld]**  
[Name] \$  
**FOR RESPONDENT:** (derived from [RespName])  
**FOR OTHER HOUSEHOLD MEMBERS:** I would like to ask you a few details about the other (*person/people*) in this household.  
What is the name of the (*other/next*) person?  
(HH MEMBERS CAN BE ENTERED IN ANY ORDER...)  
Open Question (Maximum of 10 characters)

Q48/Q54/Q60/Q66/Q72/Q78/Q84/Q90/Q96/Q102/Q108/Q114/Q120/Q126/Q132

[Sex]<sup>5</sup>  
**FOR RESPONDENT:** (derived from [RespSex])

---

<sup>5</sup> Called [RSex], [P2Sex], [P3Sex] etc on SPSS file.

**FOR OTHER HOUSEHOLD MEMBERS:** PLEASE CODE SEX OF (name)

- 1 Male
- 2 Female
- 8 (Don't know)
- 9 (Refusal)

Q49/Q55/Q61/Q67/Q73/Q79/Q85/Q91/Q97/Q103/Q109/Q115/Q121/Q127/Q133

[AgeX] <sup>6</sup>

**FOR RESPONDENT:** (derived from [RespAge])

**FOR OTHER HOUSEHOLD MEMBERS:** What was (name)'s age last birthday?

FOR 97+, CODE 97.

Range: 0 ... 97

- 98 (Don't know)
- 99 (Refusal)

Q50/Q56/Q62/Q68/Q74/Q80/Q86/Q92/Q98/Q104/Q110/Q116/Q122/Q128/Q134

[Rel3] <sup>7</sup>

What is (name)'s relationship to you?

- 1 Partner/ spouse/ cohabitee
- 2 Son/ daughter (inc step/adopted)
- 3 Grandson/ daughter (inc step/adopted)
- 4 Parent/ parent-in-law
- 5 Grand-parent
- 6 Brother/ sister (inc. in-law)
- 7 Other relative
- 8 Other non-relative
- 98 (Don't know)
- 99 (Refusal)

Q51/Q57/Q63/Q69/Q75/Q81/Q87/Q93/Q99/Q105/Q111/Q117/Q123/Q129/Q135

[Rel2] <sup>8</sup> **(NOT ON SCREEN)**

Dv

relationship to Respondent <7 categories> DV

- 1 Partner/spouse/cohabitee
- 2 Son/daughter (inc step/adopted)
- 3 Grandson/ daughter (inc step/adopted)
- 4 Parent/ parent-in-law
- 5 Grand-parent
- 6 Other relative
- 7 Other non-relative
- 8 (Don't know)
- 9 (Refusal)

Q52/Q58/Q64/Q70/Q76/Q82/Q88/Q94/Q100/Q106/Q112/Q118/Q124/Q130/Q136

[Rel] <sup>9</sup> **(NOT ON SCREEN)**

relationship to Respondent? <5 categories> DV

- 1 Partner/spouse/cohabitee
- 2 Son/daughter (inc step/adopted)
- 3 Parent/ parent-in-law
- 4 Other relative
- 5 Other non-relative
- 8 (Don't know)

---

<sup>6</sup> Called [RAge], [P2Age], [P3Age] etc on SPSS file. See also derived variables [RAgeCat], [RAgeCat2], [RSexAge] and [RSexAge2].

<sup>7</sup> Called [P2Rel3], [P3Rel3] etc on SPSS file. See also derived variables [P2Rel2], [P2Rel], [P3Rel2], [P2Rel] etc.

<sup>8</sup> Called [P2Rel2], [P3Rel2] etc on SPSS file. Derived from [P2Rel3], [P3Rel3] etc.

<sup>9</sup> Called [P2Rel], [P3Rel] etc on SPSS file. Derived from [P2Rel3], [P3Rel3] etc.

9 (Refusal)

Q138 [RAgeCat] <sup>10</sup> **(NOT ON SCREEN)**  
 Age of respondent (grouped) <7 category> dv

|   |                         |
|---|-------------------------|
| 1 | 18-24                   |
| 2 | 25-34                   |
| 3 | 35-44                   |
| 4 | 45-54                   |
| 5 | 55-59                   |
| 6 | 60-64                   |
| 7 | 65+                     |
| 8 | DK/Refused/Not answered |

Q139 [RAgeCat2] <sup>11</sup> **(NOT ON SCREEN)**  
 Age of respondent (grouped) <6 category> dv

|   |           |
|---|-----------|
| 1 | 18-24     |
| 2 | 25-34     |
| 3 | 35-44     |
| 4 | 45-54     |
| 5 | 55-64     |
| 6 | 65-97     |
| 9 | DK/Ref/NA |

Q140 [RSexAge] <sup>12</sup> **(NOT ON SCREEN)**  
 Age grouped within sex <16 category> dv

|    |                          |
|----|--------------------------|
| 1  | Male: 18-24              |
| 2  | Male: 25-34              |
| 3  | Male: 35-44              |
| 4  | Male: 45-54              |
| 5  | Male: 55-59              |
| 6  | Male: 60-64              |
| 7  | Male: 65+                |
| 8  | Male: Age not answered   |
| 9  | Female: 18-24            |
| 10 | Female: 25-34            |
| 11 | Female: 35-44            |
| 12 | Female: 45-54            |
| 13 | Female: 55-59            |
| 14 | Female: 60-64            |
| 15 | Female: 65+              |
| 16 | Female: Age not answered |

Q141 [RSexAge2] <sup>13</sup> **(NOT ON SCREEN)**  
 Age grouped within sex <14 category> dv

|    |                        |
|----|------------------------|
| 1  | Male: 18-24            |
| 2  | Male: 25-34            |
| 3  | Male: 35-44            |
| 4  | Male: 45-54            |
| 5  | Male: 55-64            |
| 6  | Male: 65+              |
| 7  | Male: Age not answered |
| 8  | Female: 18-24          |
| 9  | Female: 25-34          |
| 10 | Female: 35-44          |

---

<sup>10</sup> Called [P2Rel], [P3Rel] etc on SPSS file. Derived from [P2Rel3], [P3Rel3] etc.

<sup>11</sup> Derived from [RSex] and [RAge].

<sup>12</sup> Derived from [RSex] and [RAge].

<sup>13</sup> Derived from [RSex] and [RAge].

11 Female: 45-54  
 12 Female: 55-64  
 13 Female: 65+  
 14 Female: Age not answered

Q142 [SmSexPar] \$ (NOT ON SCREEN)  
 same sex partner in HH -- dv -- DROP  
 1 opposite sex partner in household  
 2 same sex partner in household  
 3 no partner in household  
 4 >1 partner in household  
 7 can't derive - missing info

Q143 [MarStat6] <sup>14</sup>  
 CARD A1  
 Can I just check, which of these applies to you at present?  
 Please choose the first on the list that applies  
 1 Married  
 2 In same sex civil partnership  
 3 Living with a partner  
 4 Separated (after being married or in a civil partnership)  
 5 Divorced/dissolved civil partnership  
 6 Widowed/surviving partner from a civil partnership  
 7 Single (never married/never in a civil partnership)  
 8 (Don't know)  
 9 (Refusal)

Q144 [MarStat] <sup>15</sup> **(NOT ON SCREEN)**  
 Marital status <5 categories> dv  
 1 Married  
 2 Living as married  
 3 Separated or divorced after marrying  
 4 Widowed  
 5 Not married  
 8 (Don't know)  
 9 (Refusal)

Q145 [Married] <sup>16</sup> **(NOT ON SCREEN)**  
 Marital status <4 categories> dv  
 1 Married/living as married  
 2 Separated/divorced  
 3 Widowed  
 4 Never married  
 9 No information  
 98 (Don't know)  
 99 (Refusal)

**IF 'Living with a partner' AT [MarStat5]**

Q146 [LegStat3] \$  
 CARD A2  
 And what is your legal marital status?  
 1 Married  
 2 In civil partnership  
 3 Separated (after being married or in a civil partnership)  
 4 Divorced/dissolved civil partnership  
 5 Widowed / surviving partner from civil partnership  
 6 Single (never married/never in civil partnership)

---

<sup>14</sup> See also derived variables [MarStat] and [Married].

<sup>15</sup> Derived from [MarStat5].

<sup>16</sup> Derived from [MarStat5].

7 (Other (WRITE IN))  
8 (Don't know)  
9 (Refusal)

Q147 [othspec] \$  
WRITE IN OTHER ANSWER GIVEN  
**NOTE THAT "LIVING WITH PARTNER" IS NOT A LEGAL MARITAL STATUS.**  
Open Question (Maximum of 120 characters)

**ASK ALL**

Q149 [LegMarSt] <sup>17</sup> **(NOT ON SCREEN)**  
legal marital status all respondents dv  
1 Married  
2 In civil partnership  
3 Separated (after being married)  
4 Divorced  
5 Widowed  
6 Single (never married)  
7 (Other (WRITE IN))  
8 (Don't know)  
9 (Refusal)

Q152 [NCh415] \$ **(NOT ON SCREEN)**  
Number of children in HH aged 4-15yrs dv  
Range: 0 ... 97  
99 (Can't compute)

Q153 [NCh015] \$ **(NOT ON SCREEN)**  
Number of children in HH aged 0-15yrs dv  
Range: 0 ... 97  
99 (Can't compute)

Q154 [NCh318] \$ **(NOT ON SCREEN)**  
Number of children in HH aged 3-8yrs dv  
Range: 0 ... 97  
99 (Can't compute)

Q155 [HhCh04] \$ **(NOT ON SCREEN)**  
Number of children in HH aged 0-4yrs - dv  
Range: 0 ... 14  
99 (Can't compute)

Q156 [HhCh511] \$ **(NOT ON SCREEN)**  
Number of children in HH aged 5-11yrs - dv  
Range: 0 ... 14  
99 (Can't compute)

Q157 [HhCh1215] \$ **(NOT ON SCREEN)**  
Number of children in HH aged 12-15yrs - dv  
Range: 0 ... 14  
99 (Can't compute)

Q158 [HhCh1617] \$ **(NOT ON SCREEN)**  
Number of children in HH aged 16-17yrs - dv  
Range: 0 ... 14  
99 (Can't compute)

Q159 [RCh04] \$ **(NOT ON SCREEN)**

---

<sup>17</sup> Derived from [MarStat5] and [LegStat2]

Number of Respondents children in HH aged 0-4yrs - dv  
 Range: 0 ... 14  
 99 (Can't compute)

Q160 [RCh511] \$ **(NOT ON SCREEN)**  
 Number of Respondents children in HH aged 5-11yrs - dv  
 Range: 0 ... 14  
 99 (Can't compute)

Q161 [RCh1215] \$ **(NOT ON SCREEN)**  
 Number of Respondents children in HH aged 12-15yrs - dv  
 Range: 0 ... 14  
 99 (Can't compute)

Q162 [RCh1617] \$ **(NOT ON SCREEN)**  
 Number of Respondents children in HH aged 16-17yrs - dv  
 Range: 0 ... 14  
 99 (Can't compute)

Q163 [HhType]  
 Household type dv  
 1 Single hhold  
 2 1 adult, 1 child  
 3 1 adult, 2 children  
 4 1 adult, 3+ children  
 5 2 adults  
 6 2 adults, 1 child  
 7 2 adults, 2 children  
 8 2 adults, 3+ children  
 9 3 adults  
 10 3 adults, child(ren)  
 11 4 adults  
 12 4 adults, child(ren)  
 13 5 adults  
 14 5 adults, child(ren)  
 15 6 adults  
 16 6 adults, child(ren)  
 17 7 adults  
 18 7 adults, child(ren)  
 19 8 adults  
 20 8 adults, child(ren)  
 21 9 adults  
 22 9 adults, child(ren)  
 23 10 adults  
 24 10 adults, child(ren)  
 25 11 adults  
 26 11 adults, child(ren)  
 27 12 adults  
 28 12 adults, child(ren)  
 95 Other  
 99 Dont know/Refusal

Q164- [Relat3]  
 Q176 CARD A3  
 Can I just check which, if any, of these types of relatives do you  
 yourself have alive at the moment. Please include adoptive and step  
 relatives.  
 PROBE: Which others?  
 DO NOT INCLUDE FOSTER RELATIVES  
 CODE ALL THAT APPLY  
 Multicoded (Maximum of 13 codes)

|    |                               |            |
|----|-------------------------------|------------|
| 1  | Father                        | [RelFath]  |
| 2  | Mother                        | [RelMoth]  |
| 3  | Brother                       | [RelBroth] |
| 4  | Sister                        | [RelSist]  |
| 5  | Son                           | [RelSon]   |
| 6  | Daughter                      | [RelDaug]  |
| 7  | Grandchild (daughter's child) | [RelGrChD] |
| 8  | Grandchild (son's child)      | [RelGrChS] |
| 9  | Grandfather (father's father) | [RelGfFa]  |
| 10 | Grandfather (mother's father) | [RelGfMo]  |
| 11 | Grandmother (father's mother) | [RelGmFa]  |
| 12 | Grandmother (mother's mother) | [RelGmMo]  |
| 13 | None of these                 | [RelNone3] |
| 98 | (Don't know)                  |            |
| 99 | (Refusal)                     |            |

**IF 'Grandchild' IN [Relat3]**

Q190 [GChild16]  
Do you have any grandchildren aged under 16?

|   |              |
|---|--------------|
| 1 | Yes          |
| 2 | No           |
| 8 | (Don't know) |
| 9 | (Refusal)    |

**IF 'Yes' AT [GChild16]**

Q191 [GChBothP]  
Thinking of your grandchildren aged under 16, are they all living together with both their parents?

|   |              |
|---|--------------|
| 1 | Yes          |
| 2 | No           |
| 8 | (Don't know) |
| 9 | (Refusal)    |

**IF 'No' AT [GChBothP]**

Q192 [GChWhich]  
These grandchildren who are not living with both their parents, are they your son's children, your daughter's children or both?

|   |                     |
|---|---------------------|
| 1 | Son's children      |
| 2 | Daughter's children |
| 3 | Both                |
| 8 | (Don't know)        |
| 9 | (Refusal)           |

**ASK ALL**

Q194 [BTime2] <sup>18</sup> \$ **(NOT ON SCREEN)**  
Start time of economic activity block  
Range: 0 ... 1440

|      |              |
|------|--------------|
| 9998 | (Don't know) |
| 9999 | (Refusal)    |

Q195 [REconFW] \$ <sup>19</sup>  
CARD A4  
Which of these descriptions applied to what you were doing last week, that is the seven days ending last Sunday?  
PROBE: Which others? CODE ALL THAT APPLY  
Multicoded (Maximum of 11 codes)

|   |                                                                          |
|---|--------------------------------------------------------------------------|
| 1 | In full-time education (not paid for by employer, including on vacation) |
|---|--------------------------------------------------------------------------|

---

<sup>18</sup> Computed

<sup>19</sup> See derived variable [REconAct] and [REconSum] located in the Employment section of the SPSS file.

2 On government training/employment programme  
3 In paid work (or away temporarily) for at least 10 hours in week  
4 Waiting to take up paid work already accepted  
5 Unemployed and registered at a JobCentre or JobCentre Plus  
6 Unemployed, **not** registered, but actively looking for a job (of at least  
10 hrs a week)  
7 Unemployed, wanting a job (of at least 10 hrs per week) but **not** actively  
looking for a job  
8 Permanently sick or disabled  
9 Wholly retired from work  
10 Looking after the home  
11 (Doing something else) (WRITE IN)  
98 (Don't know)  
99 (Refusal)

**IF 'doing something else' AT [REconFW]**

Q206 [othspec] \$  
WRITE IN OTHER ANSWER GIVEN  
Open Question (Maximum of 120 characters)

**ASK ALL**

Q208 [REconAc2] \$ <sup>20</sup> **(NOT ON SCREEN)**  
dv R ECON ACTIVITY PRIORITY CODED - DROP  
1 In full-time education (not paid for by employer, including on vacation)  
2 On government training/employment programme  
3 In paid work (or away temporarily) for at least 10 hours in week  
4 Waiting to take up paid work already accepted  
5 Unemployed and registered at a JobCentre or JobCentre Plus  
6 Unemployed, **not** registered, but actively looking for a job (of at least  
10 hrs a week)  
7 Unemployed, wanting a job (of at least 10 hrs per week) but **not** actively  
looking for a job  
8 Permanently sick or disabled  
9 Wholly retired from work  
10 Looking after the home  
11 (Doing something else) (WRITE IN)  
98 (Don't know)  
99 (Refusal)

**ASK ALL THOSE WHO ARE NOT WORKING OR WAITING TO TAKE UP WORK (I.E. 'in  
full-time education', 'on government training scheme', 'unemployed',  
'permanently sick or disabled', 'wholly retired from work', 'looking  
after the home' OR 'doing something else' AT [REconAc2])**

Q209 [RLastJb2] \$  
How long ago did you last have a paid job of at least 10 hours a week?  
GOVERNMENT PROGRAMMES/SCHEMES DO NOT COUNT AS 'PAID JOBS'.

|   |                                          |
|---|------------------------------------------|
| 1 | Within past 12 months                    |
| 2 | Over 1, up to 5 years ago                |
| 3 | Over 5, up to 10 years ago               |
| 4 | Over 10, up to 20 years ago              |
| 5 | Over 20 years ago                        |
| 6 | Never had a paid job of 10+ hours a week |
| 8 | (Don't know)                             |
| 9 | (Refusal)                                |

**ASK ALL 'married', 'in civil partnership' OR 'living with a partner' AT  
[MarStat6]**

<sup>20</sup> See derived variable [REconAct] and [REconSum] located in the Employment section of the SPSS file.

Q210 [SEconFW] \$ <sup>21</sup>  
 CARD A4 AGAIN  
 Which of these descriptions applied to what your  
 (*wife/husband/partner*) was doing last week, that is the seven days  
 ending last Sunday?  
 PROBE: Which others? CODE ALL THAT APPLY  
 Multicoded (Maximum of 11 codes)

- 1 In full-time education (not paid for by employer, including on vacation)
- 2 On government training/employment programme
- 3 In paid work (or away temporarily) for at least 10 hours in week
- 4 Waiting to take up paid work already accepted
- 5 Unemployed and registered at a JobCentre or JobCentre Plus
- 6 Unemployed, **not** registered, but actively looking for a job (of at least  
 10 hrs a week)
- 7 Unemployed, wanting a job (of at least 10 hrs per week) but **not** actively  
 looking for a job
- 8 Permanently sick or disabled
- 9 Wholly retired from work
- 10 Looking after the home
- 11 (Doing something else) (WRITE IN)
- 98 (Don't know)
- 99 (Refusal)

**IF 'doing something else' AT [SEconFW]**

Q221 [OthSpec] \$  
 WRITE IN OTHER ANSWER GIVEN  
 Open Question (Maximum of 120 characters)

**ASK ALL 'married', 'in civil partnership' OR 'living with a partner' AT  
 [MarStat5]**

Q223 [SEconAc2] \$ <sup>22</sup> (NOT ON SCREEN)  
 dv S/P ECON ACTIVITY PRIORITY CODED: DROP

- 1 In full-time education (not paid for by employer, including on vacation)
- 2 On government training/employment programme
- 3 In paid work (or away temporarily) for at least 10 hours in week
- 4 Waiting to take up paid work already accepted
- 5 Unemployed and registered at a JobCentre or JobCentre Plus
- 6 Unemployed, **not** registered, but actively looking for a job (of at least  
 10 hrs a week)
- 7 Unemployed, wanting a job (of at least 10 hrs per week) but **not** actively  
 looking for a job
- 8 Permanently sick or disabled
- 9 Wholly retired from work
- 10 Looking after the home
- 11 (Doing something else) (WRITE IN)
- 98 (Don't know)
- 99 (Refusal)

**ASK ALL THOSE WHOSE SPOUSE/PARTNER IS NOT WORKING OR WAITING TO TAKE UP  
 WORK (I.E. 'in full-time education', 'on government training scheme',  
 'unemployed', 'permanently sick or disabled', 'wholly retired from  
 work', 'looking after the home' OR 'doing something else' AT [SEconAc2])**

Q224 [SLastJb2] \$ <sup>23</sup>

---

<sup>21</sup> See derived variable [SEconAct] and SREconSum] located in the Classification section of the SPSS file.

<sup>22</sup> See derived variable [SEconAct] and [SEconSum] located in the Employment section of the SPSS file.

<sup>23</sup> See variable called [SLastJob] located in the Classification section of the SPSS file.

How long ago did your (*wife/husband/partner*) last have a paid job of at least 10 hours a week?

GOVERNMENT PROGRAMMES/SCHEMES DO NOT COUNT AS `PAID JOBS'.

- 1 Within past 12 months
- 2 Over 1, up to 5 years ago
- 3 Over 5, up to 10 years ago
- 4 Over 10, up to 20 years ago
- 5 Over 20 years ago
- 6 Never had a paid job of 10+ hours a week
- 8 (Don't know)
- 9 (Refusal)

## Newspaper readership and internet

### ASK ALL

Q225 [BTime] <sup>24</sup> \$ **(NOT ON SCREEN)**

Start time of BNewsp block

Range: 0 ... 1440

Q226 [Readpap]

Do you normally read any daily **morning** newspaper at least 3 times a week?

1 Yes

2 No

8 (Don't know)

9 (Refusal)

### IF 'yes' AT [Readpap]

Q227 [WhPaper]

Which one do you normally read?

IF MORE THAN ONE: Which one do you read **most** frequently?

1 (*Scottish*) Express

2 (*Scottish*) Mail

3 Daily Mirror (*/Scottish Mirror*)

4 Daily Star

5 (*The Sun/ Scottish Sun*)

6 Daily Record

7 Daily Telegraph

8 Financial Times

9 The Guardian

10 The Independent

11 The Times

12 Morning Star

94 Other Irish/Northern Irish/Scottish regional or local **daily morning** paper (WRITE IN)

95 Other (WRITE IN)

96 MORE THAN ONE PAPER READ WITH EQUAL FREQUENCY

98 (Don't know)

99 (Refusal)

### IF 'other Irish/Northern Irish/Scottish regional or local daily morning paper' AT [WhPaper]

Q228 [othspec] \$

WRITE IN OTHER ANSWER GIVEN

Open Question (Maximum of 120 characters)

### IF 'other' OR 'MORE THAN ONE PAPER READ WITH EQUAL FREQUENCY' AT [WhPaper]

Q230 [othspec] \$

WRITE IN OTHER ANSWER GIVEN

Open Question (Maximum of 120 characters)

### ASK ALL

Q232 [TVNews]

CARD A5

How often, if at all, do you watch all or part of a news programme on television?

1 Several times a day

2 Every day

---

<sup>24</sup> Computed

3 Several times a week  
4 At least once a week  
5 A couple of times a month  
6 Once a month  
7 Less often than once a month  
8 Never  
98 (Don't know)  
99 (Refusal)

Q233 [WebNews]  
CARD A5 AGAIN  
How often, if at all, do you look online at a news or newspaper website?

1 Several times a day  
2 Every day  
3 Several times a week  
4 At least once a week  
5 A couple of times a month  
6 Once a month  
7 Less often than once a month  
8 Never  
98 (Don't know)  
99 (Refusal)

**IF NOT ('Never', DK or RF) AT [WebNews]**

Q234 [WNwSite1]  
Which news or newspaper website do you visit most often?  
NOTE: IF MENTIONS SITES LIKE MSN, GOOGLE OR YAHOO, CHECK IF THEY USE IT  
JUST TO SEARCH -  
IF YES, PROBE FOR WHICH WEBSITE THEY THEN GO TO.  
OTHERWISE CODE AS 'Other- General'.

1 BBC News  
2 ITV/ITN News  
3 Channel 4 News  
4 Sky News  
5 Reuters  
6 Daily Express/Sunday Express  
7 Daily Mail or Mail Online/Mail on Sunday  
8 Daily Mirror/Sunday Mirror  
9 Daily Star  
10 The Sun/News of the World  
11 Daily Record/Sunday Mail  
12 Daily Telegraph/The Sunday Telegraph  
13 Financial Times  
14 The Guardian/The Observer  
15 The Independent/The Independent on Sunday  
16 The Times/The Sunday Times  
17 Metro  
18 The People  
19 The Scotsman/Scotland on Sunday  
20 The Herald/Sunday Herald  
21 STV  
22 Caledonian Mercury  
23 The Press & Journal  
24 The Courier/Dundee Courier  
95 Other - UK site (PLEASE WRITE IN)  
96 Other - Foreign site (PLEASE WRITE IN)  
97 Other - General (PLEASE WRITE IN)  
98 (Don't know)  
99 (Refusal)

**IF 'Other - UK site' AT [WNwSite1]**

Q235 [othspec] \$  
WRITE IN OTHER ANSWER GIVEN  
Open Question (Maximum of 120 characters)

**IF 'Other - Foreign site' AT [WNwSite1]**

Q237 [othspec] \$  
WRITE IN OTHER ANSWER GIVEN  
Open Question (Maximum of 120 characters)

**IF 'Other - general' AT [WNwSite1]**

Q239 [othspec] \$  
WRITE IN OTHER ANSWER GIVEN  
Open Question (Maximum of 120 characters)

**IF NOT ('Rare', 'Never', DK or RF) AT [WebNews]**

Q241 [WNwSite2]  
And which news or newspaper website do you visit next most often?

0 None  
1 BBC News  
2 ITV/ITN News  
3 Channel 4 News  
4 Sky News  
5 Reuters  
6 Daily Express/Sunday Express  
7 Daily Mail or Mail Online/Mail on Sunday  
8 Daily Mirror/Sunday Mirror  
9 Daily Star  
10 The Sun/News of the World  
11 Daily Record/Sunday Mail  
12 Daily Telegraph/The Sunday Telegraph  
13 Financial Times  
14 The Guardian/The Observer  
15 The Independent/The Independent on Sunday  
16 The Times/The Sunday Times  
17 Metro  
18 The People  
19 The Scotsman/Scotland on Sunday  
20 The Herald/Sunday Herald  
21 STV  
22 Caledonian Mercury  
23 The Press & Journal  
24 The Courier/Dundee Courier  
95 Other - UK site (PLEASE WRITE IN)  
96 Other - Foreign site (PLEASE WRITE IN)  
97 Other - General (PLEASE WRITE IN)  
98 (Don't know)  
99 (Refusal)

**IF 'Other - UK site' AT [WNwSite1]**

Q242 [othspec] \$  
WRITE IN OTHER ANSWER GIVEN  
Open Question (Maximum of 120 characters)

**IF 'Other - Foreign site' AT [WNwSite1]**

Q244 [othspec] \$  
WRITE IN OTHER ANSWER GIVEN  
Open Question (Maximum of 120 characters)

**IF 'Other - general' AT [WNwSite1]**

Q246 [othspec] \$  
WRITE IN OTHER ANSWER GIVEN

Open Question (Maximum of 120 characters)

**ASK ALL**

Q248 [Internt]<sup>25</sup>  
Does anyone have access to the internet or World Wide Web from this address?  
1 Yes  
2 No  
8 (Don't know)  
9 (Refusal)

**IF 'Yes' AT [Internt]**

Q249 [BroadBnd]  
Do you have a **broadband** connection to the internet?  
1 Yes  
2 No  
8 (Don't know)  
9 (Refusal)

**IF 'On government training' OR 'In paid work' AT [REconAct]**

Q250 [WWWWork]  
And do you yourself ever use the internet or World Wide Web **for your work?**  
1 Yes  
2 No  
8 (Don't know)  
9 (Refusal)

**ASK ALL**

Q251 [WWWUse]  
Do you yourself ever use the internet or World Wide Web for any reason *(other than for your work)?*  
1 Yes  
2 No  
8 (Don't know)  
9 (Refusal)

**IF 'Yes' AT [WWWUse]**

Q252 [WWWHrsWk]  
How many **hours** a week on average do you spend using the Internet or World Wide Web *(other than for your work)?*  
INTERVIEWER: ROUND UP TO NEAREST HOUR  
Range: 0 ... 997  
998 (Don't know)  
999 (Refusal)

---

<sup>25</sup> Called [Internet] on SPSS file.

## Party identification

### ASK ALL

Q253 [BTime] <sup>26</sup> \$ (NOT ON SCREEN)

Start time of BParty block

Range: 0 ... 1440

Q254 [SupParty]

Generally speaking, do you think of yourself as a supporter of any one political party?

1 Yes

2 No

8 (Don't know)

9 (Refusal)

### IF 'no' OR DON'T KNOW AT [SupParty]

Q255 [ClosePty]

Do you think of yourself as a little closer to one political party than to the others?

1 Yes

2 No

8 (Don't know)

9 (Refusal)

### IF 'yes' AT [SupParty] OR 'yes', 'no' OR DON'T KNOW AT [ClosePty]

Q256 [PartyFW] <sup>27</sup>

IF 'yes' AT [SupParty] OR AT [ClosePty]: Which one?

IF 'no' OR DON'T KNOW AT [ClosePty]: If there were a general election tomorrow, which political party do you think you would be most likely to support?

DO NOT PROMPT

1 Conservative

2 Labour

3 Liberal Democrat

4 Scottish National Party

5 Plaid Cymru

6 Green Party

7 UK Independence Party (UKIP)/Veritas

8 British National Party (BNP)/ National Front

9 RESPECT/ Scottish Socialist Party (SSP)/ Socialist Party

10 Other party (WRITE IN)

11 Other answer (WRITE IN)

12 None

20 Refused to say

98 (Don't know)

99 (Refusal)

### IF 'other party' AT [PartyFW]

Q257 [OthSpec] \$

WRITE IN OTHER ANSWER GIVEN

Open Question (Maximum of 120 characters)

### IF 'other answer' AT [PartyFW]

Q259 [OthSpec] \$

WRITE IN OTHER ANSWER GIVEN

---

<sup>26</sup> Computed

<sup>27</sup> Called [PartyIDN] on SPSS file. See derived variables [PartyID1], [PartyID2], and [PtyAlleg].

Open Question (Maximum of 120 characters)

**IF 'yes' AT [SupParty] OR 'yes', 'no' OR DON'T KNOW AT [ClosePty]**  
Q261 [Partyid1] <sup>28</sup> **(NOT ON SCREEN)**

R's political party identification dv

- 1 Conservative
- 2 Labour
- 3 Liberal Democrat
- 6 Scottish National Party
- 7 Plaid Cymru
- 8 Other party
- 9 Other answer
- 10 None
- 11 UK Independence Party (UKIP)/Veritas
- 12 British National Party (BNP)/ National Front
- 13 RESPECT/ Scottish Socialist Party (SSP)/ Socialist Party
- 95 Green Party
- 98 (Don't know)
- 99 (Refusal)

Q262 [PartyId2] <sup>29</sup> **(NOT ON SCREEN)**  
Party political id(compressed) dv

- 1 Conservative
- 2 Labour
- 3 Liberal Democrat
- 4 Other party
- 5 None
- 6 Green Party
- 8 Other/DK/Ref

Q263 [PtyAlleg] <sup>30</sup> **(NOT ON SCREEN)**

Party political allegiance dv

- 1 Conservative partisan
- 2 Conservative sympathiser
- 3 Conservative residual identifier
- 4 Labour partisan
- 5 Labour sympathiser
- 6 Labour residual identifier
- 7 LibDem partisan
- 8 LibDem sympathiser
- 9 LibDem residual identifier
- 10 Other party
- 11 None
- 12 Green partisan
- 13 Green sympathiser
- 14 Green residual identifier
- 98 Other/DK/Refusal

**IF PARTY GIVEN AT [PartyFW]**

Q264 [Idstrng]  
Would you call yourself very strong (*party*), fairly strong, or not very strong?

- 1 Very strong (*party*)
- 2 Fairly strong
- 3 Not very strong
- 8 (Don't know)
- 9 (Refusal)

---

<sup>28</sup> Derived from [PartyFW].

<sup>29</sup> Derived from [PartyFW].

<sup>30</sup> Derived from [SupParty], [ClosePty] and [PartyFW].



## Public spending and social welfare

### ASK ALL

Q267 [BTime] \$  
Start time of BSocSec block  
Range: 0 ... 1440

Q268 [Spend1]  
CARD B1  
Here are some items of government spending.  
Which of them, if any, would be your highest priority for **extra**  
spending?  
Please read through the whole list before deciding.  
ENTER ONE CODE ONLY FOR HIGHEST PRIORITY

- 1 Education
- 2 Defence
- 3 Health
- 4 Housing
- 5 Public transport
- 6 Roads
- 7 Police and prisons
- 8 Social security benefits
- 9 Help for industry
- 10 Overseas aid
- 11 (None of these)
- 98 (Don't know)
- 99 (Refusal)

### IF NOT 'None of these', DON'T KNOW OR REFUSAL AT [Spend1]

Q269 [Spend2]  
CARD B1 AGAIN  
And which next?  
ENTER ONE CODE ONLY FOR NEXT HIGHEST

- 1 Education
- 2 Defence
- 3 Health
- 4 Housing
- 5 Public transport
- 6 Roads
- 7 Police and prisons
- 8 Social security benefits
- 9 Help for industry
- 10 Overseas aid
- 11 (None of these)
- 98 (Don't know)
- 99 (Refusal)

### ASK ALL

Q270 [SocBen1]  
CARD B2  
Thinking now only of the government's spending on **social benefits** like  
those on the card.  
Which, if any, of these would be your highest priority for **extra**  
spending?  
ENTER ONE CODE ONLY FOR HIGHEST PRIORITY

- 1 Retirement pensions
- 2 Child benefits
- 3 Benefits for the unemployed
- 4 Benefits for disabled people

5 Benefits for single parents  
6 (None of these)  
8 (Don't know)  
9 (Refusal)

**IF NOT 'None of these', DON'T KNOW OR REFUSAL AT [SocBen1]**

Q271 [SocBen2]  
CARD B2 AGAIN  
And which next?  
ENTER ONE CODE ONLY FOR NEXT HIGHEST  
1 Retirement pensions  
2 Child benefits  
3 Benefits for the unemployed  
4 Benefits for disabled people  
5 Benefits for single parents  
6 (None of these)  
8 (Don't know)  
9 (Refusal)

**ASK ALL**

Q272 [HIncDif4]  
CARD B3  
Which of the phrases on this card would you say comes closest to your feelings about your household's income these days?  
1 Living really comfortably on present income  
2 Living comfortably on present income  
3 Neither comfortable nor struggling on present income  
4 Struggling on present income  
5 Really struggling on present income  
7 (Other answer (WRITE IN))  
8 (Don't know)  
9 (Refusal)

**IF 'Other answer' AT [HIncDif4]**

Q273 [othspec] \$  
WRITE IN OTHER ANSWER GIVEN  
Open Question (Maximum of 120 characters)

**ASK ALL**

Q275 [ImpBen1]  
CARD B4  
There are different things the government can do to **improve the benefit system**. Which, if any, of these do you think should be the government's highest priority?  
ENTER ONE CODE ONLY FOR HIGHEST PRIORITY  
1 Making sure those who are entitled to money claim it  
2 Targeting benefits only at those who really need them  
3 Rewarding those who work or look for work  
4 Making sure those who save are not penalised  
5 Providing benefits for those who cannot work  
6 Making sure payments are fast and accurate  
7 Reducing fraud  
8 (None of these)  
98 (Don't know)  
99 (Refusal)

**IF NOT 'None of these', DON'T KNOW OR REFUSAL AT [ImpBen1]**

Q276 [ImpBen2]  
CARD B4 AGAIN  
And which next?  
ENTER ONE CODE ONLY FOR NEXT HIGHEST PRIORITY

1 Making sure those who are entitled to money claim it  
2 Targeting benefits only at those who really need them  
3 Rewarding those who work or look for work  
4 Making sure those who save are not penalised  
5 Providing benefits for those who cannot work  
6 Making sure payments are fast and accurate  
7 Reducing fraud  
8 (None of these)  
98 (Don't know)  
99 (Refusal)

**ASK ALL**

Q277 [HealResp]  
CARD B5  
Please say from this card who you think should **mainly** be responsible for paying for the cost of health care when someone is ill?  
1 Mainly the government  
2 Mainly a person's employer  
3 Mainly a person themselves and their family  
8 (Don't know)  
9 (Refusal)

Q278 [RetResp]  
CARD B5 AGAIN  
Still looking at this card, who do you think should **mainly** be responsible for ensuring that people have enough money to live on in retirement?  
1 Mainly the government  
2 Mainly a person's employer  
3 Mainly a person themselves and their family  
8 (Don't know)  
9 (Refusal)

Q279 [SickResp]  
CARD B5 AGAIN  
And who do you think should **mainly** be responsible for ensuring that people have enough to live on if they become sick for a long time or disabled?  
1 Mainly the government  
2 Mainly a person's employer  
3 Mainly a person themselves and their family  
8 (Don't know)  
9 (Refusal)

Q280 [MtUnmar1]  
Imagine an unmarried couple who split up. They have a child at primary school who remains with the mother. Do you think that the father should always be made to make maintenance payments to support the child?  
1 Yes  
2 No  
8 (Don't know)  
9 (Refusal)

Q281 [MtUnmar2]  
If he **does** make the maintenance payments for the child, should the amount depend on his income, or not?  
1 Yes  
2 No  
8 (Don't know)  
9 (Refusal)

Q282 [MtUnmar3]  
Do you think the amount of maintenance should depend on the **mother's** income, or not?

- 1 Yes
- 2 No
- 8 (Don't know)
- 9 (Refusal)

Q283 [MtUnmar4]  
Suppose the mother now marries someone else. Should the child's natural father go on paying maintenance for the child, should he stop or should it depend on the step-father's income?

- 1 Continue
- 2 Stop
- 3 Depends
- 8 (Don't know)
- 9 (Refusal)

Q284 [MtUnmar5]  
Suppose instead the mother does not marry, but the father has another child with someone else. Should he go on paying maintenance for the first child, should he stop or should it depend on his income?

- 1 Continue
- 2 Stop
- 3 Depends
- 8 (Don't know)
- 9 (Refusal)

Q285 [RBGarran]  
CARD B6  
Of the options on this card, which do you think would be the best way for separated parents to make child maintenance arrangements?

- 1 Agree child maintenance arrangements between themselves
- 2 Agree child maintenance with the help of a government agency
- 3 Agree child maintenance with the help of another organisation, such as Citizens Advice
- 4 Agree child maintenance another way (WRITE IN)
- 5 EDIT ONLY: Agree child maintenance with help of courts/ lawyers/ solicitors
- 8 (Don't know)
- 9 (Refusal)

**IF 'Agree child maintenance another way' AT [RBGarran]**

Q286 [OthSpec] \$  
WRITE IN OTHER ANSWER GIVEN  
Open Question (Maximum of 120 characters)

**ASK ALL**

Q288 [ChCoIntr] \$  
In the next section, I will be asking about your views on child maintenance arrangements in different situations. Child maintenance arrangements are sometimes made by parents who are separated or who have never lived together, to help support any children they may have had together. These arrangements might involve the parent who does not live with the child making regular payments to the parent living with the child. They may also involve the parent providing support in other ways, such as through occasional gifts, payments towards the mortgage, rent or household bills, help with childcare or jobs around the house. This support could be in addition to regular payments or it might be the only type of child maintenance arrangement.

The following questions ask about child maintenance arrangements in different circumstances.

Press 1 and <Enter> to continue.

(Don't know)

(Refusal)

Q289 [ChCoSupp]

CARD B7

Imagine a situation where a child is living with its mother and has contact with its father who lives at a separate address. Who do you think is responsible for providing support for the child?

The mother is fully responsible for supporting the child with no child maintenance from the father

The mother has a greater responsibility for supporting the child, with some child maintenance from the father

The mother and father are equally responsible for supporting the child

The father has a greater responsibility for supporting the child through child maintenance, with some support from the mother

The father is fully responsible for supporting the child through child maintenance, with no support from the mother

SPONTANEOUS (It depends)

(Don't know)

(Refusal)

#### **ASK RANDOM HALF**

Q290 [ChMIncM]

CARD B8

Imagine a situation where a child is living with its mother. The mother's income is higher than the child's father's income. In what way, if any, should this affect the child maintenance arrangements?

The child maintenance arrangements should not be affected by the mother's level of income

The father should pay less child maintenance but should provide support in other ways

The father shouldn't have to pay any child maintenance but should provide support in other ways

The father should pay less child maintenance without having to provide support in other ways

The father shouldn't have to pay any child maintenance and shouldn't have to provide support in other ways

SPONTANEOUS (It depends)

(Don't know)

(Refusal)

#### **ASK THOSE THAT WEREN'T ASKED [ChMIncM]**

Q291 [ChMIncF]

CARD B9

Imagine a situation where a child is living with its father. The father's income is higher than the child's mother's income. In what way, if any, should this affect the child maintenance arrangements?

The child maintenance arrangements should not be affected by the father's level of income

The mother should pay less child maintenance but should provide support in other ways

The mother shouldn't have to pay any child maintenance but should provide support in other ways

The mother should pay less child maintenance without having to provide support in other ways

The mother shouldn't have to pay any child maintenance and shouldn't have to provide support in other ways

SPONTANEOUS (It depends)

8 (Don't know)  
9 (Refusal)

**ASK ALL**

Q292 [ChMMInd]  
CARD B10

Imagine a different situation where a child is living with its mother. The mother is now financially independent and has decided that she doesn't need any financial support from the father. In what way, if any, should this affect the child maintenance arrangements?

- 1 The child maintenance arrangements should not be affected
- 2 The mother should accept less payment from the father but accept support in other ways
- 3 The mother shouldn't have to accept any payment but should accept support in other ways
- 4 The mother shouldn't have to accept any type of child maintenance arrangement - either payment or support in other ways
- 5 SPONTANEOUS (It depends)
- 8 (Don't know)
- 9 (Refusal)

Q293 [ChMCont]  
CARD B11

Imagine another situation where a child is living with its mother. The mother has recently decided not to allow the father to have any further contact with the child. How should this affect the child maintenance arrangements?

- 1 The child maintenance arrangements should not be affected
- 2 The father should pay less child maintenance but provide support in other ways
- 3 The father shouldn't have to pay any child maintenance but should provide support in other ways
- 4 The father should pay less child maintenance without having to provide support in other ways
- 5 The father shouldn't have to pay any child maintenance and shouldn't have to provide support in other ways
- 6 SPONTANEOUS (It depends)
- 8 (Don't know)
- 9 (Refusal)

Q294 [CmEarn]  
CARD B12

A child is living with its mother and her new partner, who earns a similar amount to the child's father. What affect, if any, should this have on the child maintenance arrangements?

- 1 The child maintenance arrangements should not be affected
- 2 The father should pay less child maintenance but should provide support in other ways
- 3 The father shouldn't have to pay any child maintenance but should provide support in other ways
- 4 The father should pay less child maintenance without having to provide support in other ways
- 5 The father shouldn't have to pay any child maintenance and shouldn't have to provide support in other ways
- 6 SPONTANEOUS (It depends)
- 8 (Don't know)
- 9 (Refusal)

Q295 [ChMChoic]  
CARD B13

Imagine a situation where a child is living with its mother but sees its father regularly. The father doesn't provide any child maintenance. The mother would like to receive child maintenance but hasn't asked the father to provide this because she doesn't want to negatively affect his relationship with the child. Which of the statements on this card comes closest to your view of what should happen?

- 1 The mother should continue trying to manage without any child maintenance for the sake of the relationship between father and child
- 2 The mother should ask for child maintenance even if it is likely this would have a negative impact on the relationship between the father and the child
- 8 (Don't know)
- 9 (Refusal)

Q296 [Poverty1]

Would you say that someone in Britain **was** or **was not** in poverty if...  
... they had enough to buy the things they really needed, but not enough to buy the things most people take for granted?

- 1 Was in poverty
- 2 Was not
- 8 (Don't know)
- 9 (Refusal)

Q297 [Poverty2]

(Would you say someone in Britain **was** or **was not** in poverty ...)  
... if they had enough to eat and live, but not enough to buy other things they needed?

- 1 Was in poverty
- 2 Was not
- 8 (Don't know)
- 9 (Refusal)

Q298 [Poverty3]

(Would you say someone in Britain **was** or **was not** in poverty ...)  
... if they had not got enough to eat and live without getting into debt?

- 1 Was in poverty
- 2 Was not
- 8 (Don't know)
- 9 (Refusal)

Q299 [WhyNeed]

CARD B14

Why do you think there are people who live in need? Of the four views on this card, which **one** comes closest to your own?

CODE ONE ONLY

- 1 Because they have been unlucky
- 2 Because of laziness or lack of willpower
- 3 Because of injustice in our society
- 4 It's an inevitable part of modern life
- 5 (None of these)
- 8 (Don't know)
- 9 (Refusal)

**IF 'In paid work' AT [REconAct]**

Q300 [Wk65Mon]

CARD B15

How much do you agree or disagree with each of these statements ...READ OUT...

...If I needed the money, I would continue working for one or two years past age 65?

- 1 Agree strongly
- 2 Agree
- 3 Neither agree nor disagree
- 4 Disagree
- 5 Disagree strongly
- 8 (Don't know)
- 9 (Refusal)

**ASK ALL**

Q301 [OldWk65] \*  
CARD B15 (AGAIN)  
(How much do you agree or disagree with each of these statements ...READ OUT...)  
...Older workers should have to stop work at age 65?  
(How much do you agree or disagree?)

Q302 [OldWkFlx] \*  
CARD B15 AGAIN  
...Older workers who want to continue working after age 65 should be allowed to work flexibly, for example, working fewer hours, shorter weeks or just part of the year?  
(How much do you agree or disagree?)

Q303 [OldWkChg] \*  
CARD B15 AGAIN  
...Older workers who want to continue working with the same employer after age 65 should be allowed to change their job, for example, changing what they do or how they do it?  
(How much do you agree or disagree?)

\* [OldWk65] TO [OldWkChg]

- 1 Agree strongly
- 2 Agree
- 3 Neither agree nor disagree
- 4 Disagree
- 5 Disagree strongly
- 8 (Don't know)
- 9 (Refusal)

Q304 [FlxResp]  
CARD B16  
Who should be mainly responsible for allowing flexible working for older workers (to enable them to continue working after the age of 65)?  
1 Employers  
2 The government  
4 EDIT ONLY: People should not be allowed to work beyond 65  
96 Other (PLEASE WRITE IN)  
97 [SPONTANEOUS CODE: both equally responsible]  
98 (Don't know)  
99 (Refusal)

**IF 'Other' AT [FlxResp]**

Q305 [othspec] \$  
WRITE IN OTHER ANSWER GIVEN  
Open Question (Maximum of 120 characters)

**ASK ALL RETIRED (AT [REconAct]):**

Q307 [RetdMon]  
CARD B17

Thinking about what you are living on in retirement, including any money from pensions, benefits, savings or investments, and any earnings. Do you have enough money to cover basic costs such as housing, heating and food?

- 1 Always
- 2 Mostly
- 3 Sometimes
- 4 Hardly ever / never
- 8 (Don't know)
- 9 (Refusal)

**IF OVER STATE RETIREMENT AGE (AT [RSex] AND [RAge])**

Q308 [RPension]

On the whole would you say the present **state** pension is on the low side, reasonable, or on the high side?

IF 'ON THE LOW SIDE': Very low or a bit low?

- 1 Very low
- 2 A bit low
- 3 Reasonable
- 4 On the high side
- 8 (Don't know)
- 9 (Refusal)

**ASK ALL RETIRED (AT [REconAct])**

Q309 [RetirAg2]

At what age did you retire from work?

NEVER WORKED, CODE: 00

Range: 0 ... 90

- 98 (Don't know)
- 99 (Refusal)

**IF NOT '0' AT [RetirAg2]**

Q310 [RRetPlcy]

Did you have to retire because of your employer's policy on retirement age?

- 1 Yes
- 2 No
- 3 EDIT ONLY: Left work before retirement
- 8 (Don't know)
- 9 (Refusal)

**IF NOT 'No' AT [RRetPlcy]**

Q311- [RwhyRet]

Q317 CARD B18

Why did you retire?

Please choose a phrase from this card.

CODE AS MANY AS APPLY.

Multicoded (Maximum of 7 codes)

- 1 I left because of ill health [RRetIll]
- 2 I left to look after someone else [RRetCare]
- 3 I left because my husband/wife/partner retired [RRetPrtn]
- 4 It was made attractive to me to retire early [RRetPack]
- 5 I lost my job/I was made redundant/My firm closed down [RRetLJob]
- 6 I just wanted to retire [RRetWant]
- 97 Other answer (WRITE IN) [RRetOth]
- 98 (Don't know)
- 99 (Refusal)

**IF 'Other answer' AT [RWhyRet]**

Q318 [othspec] \$  
WRITE IN OTHER ANSWER GIVEN  
Open Question (Maximum of 120 characters)

**ASK ALL RETIRED (AT [REconAct]): IF NOT '0' AT [RetirAg2]**

Q327- [FlexFW]

Q336 CARD B19

In the three years before you retired, did you change the way you worked in any of the ways shown on this card?

CODE ALL THAT APPLY

Multicoded (Maximum of 10 codes)

- |    |                                                                                 |           |
|----|---------------------------------------------------------------------------------|-----------|
| 1  | Part-time work (less than 30 hours a week)                                      | [FxPT]    |
| 2  | Reduced my hours (but worked 30 or more hours a week)                           | [FXRed]   |
| 3  | Job sharing                                                                     | [FxJbSh]  |
| 4  | Flexitime                                                                       | [FxFlex]  |
| 5  | Compressed hours (same hours per week over fewer days)                          | [FxComp]  |
| 6  | Annualised hours (work same hours but counted over the year rather than a week) | [FxAnn]   |
| 7  | Term-time only work                                                             | [FxTTwk]  |
| 8  | Taking more unpaid leave                                                        | [FxUL]    |
| 9  | Working from home some or all of the time                                       | [FXHome]  |
| 10 | Other answer (WRITE IN)                                                         | [FxOther] |
| 11 | None of these                                                                   | [FxNone]  |
| 98 | (Don't know)                                                                    |           |
| 99 | (Refusal)                                                                       |           |

**IF 'Other answer' IN [FlexFW]**

Q348 [othspec] \$  
WRITE IN OTHER ANSWER GIVEN  
Open Question (Maximum of 120 characters)

**IF 'None of these' AT [FlexFW]**

Q350 [ContFlex]

CARD B20

When you retired, would you have **liked** to continue working if you could have worked flexibly. This might have involved working fewer hours, shorter weeks or just part of the year?

- |   |                                           |
|---|-------------------------------------------|
| 1 | <b>Definitely</b> would have liked to     |
| 2 | <b>Probably</b> would have liked to       |
| 3 | <b>Probably would not</b> have liked to   |
| 4 | <b>Definitely would not</b> have liked to |
| 8 | (Don't know)                              |
| 9 | (Refusal)                                 |

**VERSION C: ASK ALL**

Q351 [FalseClm]

I will read two statements. For each one please say whether you agree or disagree. Firstly...

Large numbers of people these days **falsely** claim benefits.

**IF AGREE OR DISAGREE:** Strongly or slightly?

- |   |                   |
|---|-------------------|
| 1 | Agree strongly    |
| 2 | Agree slightly    |
| 3 | Disagree slightly |
| 4 | Disagree strongly |
| 8 | (Don't know)      |
| 9 | (Refusal)         |

Q352 [FailClm]

(And do you agree or disagree that...)

Large numbers of people who are eligible for benefits these days **fail** to claim them.

**IF AGREE OR DISAGREE:** Strongly or slightly?

- 1 Agree strongly
- 2 Agree slightly
- 3 Disagree slightly
- 4 Disagree strongly
- 8 (Don't know)
- 9 (Refusal)

**ASK ALL**

Q353 [Dole]  
Opinions differ about the level of benefits for unemployed people.  
Which of these two statements comes closest to your own view

...READ OUT...

- 1 ...benefits for unemployed people are **too low** and cause hardship,
- 2 or, benefits for unemployed people are **too high** and discourage them from
- 3 finding jobs?
- 4 (Neither)
- 4 BOTH: UNEMPLOYMENT BENEFIT CAUSES HARDSHIP BUT CAN'T BE HIGHER OR THERE
- 5 WOULD BE NO INCENTIVE TO WORK
- 5 BOTH: UNEMPLOYMENT BENEFIT CAUSES HARDSHIP TO SOME, WHILE OTHERS DO WELL
- 6 OUT OF IT
- 6 ABOUT RIGHT/IN BETWEEN
- 7 Other answer (WRITE IN)
- 8 (Don't know)
- 9 (Refusal)

**IF 'Other answer' AT [Dole]**

Q354 [othspec] \$  
WRITE IN OTHER ANSWER GIVEN  
Open Question (Maximum of 120 characters)

**ASK ALL**

Q356 [TaxSpend]  
CARD B21  
Suppose the government had to choose between the three options on this card. Which do you think it should choose?

- 1 Reduce taxes and spend **less** on health, education and social benefits
- 2 Keep taxes and spending on these services at the **same** level as now
- 3 Increase taxes and spend **more** on health, education and social benefits
- 4 (None)
- 8 (Don't know)
- 9 (Refusal)

**VERSION C: ASK ALL**

Q357 [IncRedis]  
CARD B22  
(Please say from this card how much you agree or disagree that...)  
Income and wealth should be redistributed towards ordinary working people.

- 1 Agree strongly
- 2 Agree
- 3 Neither agree nor disagree
- 4 Disagree
- 5 Disagree strongly
- 8 (Don't know)
- 9 (Refusal)

Q358 [CareResp]  
CARD B23  
Who do you think should **mainly** be responsible for paying for the care needs of elderly people living in residential and nursing homes?

1 Mainly the government  
2 Mainly a person themselves and their family  
8 (Don't know)  
9 (Refusal)

Q359 [IncomGap]  
Thinking of income levels generally in Britain today, would you say that  
the **gap** between those with high incomes and those with low incomes is  
...READ OUT...  
1 ... too large,  
2 about right,  
3 or, too small?  
8 (Don't know)  
9 (Refusal)

Q360 [SchSelec] <sup>31</sup>  
CARD B24  
Which of the following statements comes closest to your views about what  
kind of **secondary** school children should go to?  
1 Children should go to a different kind of secondary school, according to  
how well they do at primary school  
2 All children should go to the same kind of secondary school, no matter  
how well or badly they do at primary school  
8 (Don't know)  
9 (Refusal)

---

<sup>31</sup> Asked here for version C, in the School Choice module for versions A and B.

## Education

### ASK ALL

Q363 [BTime] <sup>32</sup> \$ (NOT ON SCREEN)

Start time of BEducn block

Range: 0 ... 1440

Q364 [EdSpnd1c]

CARD C1

Now some questions about education.

Which of the groups on this card, if any, would be your highest priority for extra government spending on education?

- 1 Nursery or pre-school children
- 2 Primary school children
- 3 Secondary school children
- 4 Children with special educational needs
- 5 Students at universities
- 6 Students in further education
- 7 (None of these)
- 8 (Don't know)
- 9 (Refusal)

IF NOT 'None of these', 'Don't know' OR 'Refusal' AT [EdSpnd1c]

Q365 [EdSpnd2c]

CARD C1 AGAIN

And which is your next highest priority?

- 1 Nursery or pre-school children
- 2 Primary school children
- 3 Secondary school children
- 4 Children with special educational needs
- 5 Students at universities
- 6 Students in further education
- 7 (None of these)
- 8 (Don't know)
- 9 (Refusal)

### ASK ALL

Q366 [Happ10yr] \*

CARD C2

For the following statements please think back to children 10 years ago compared with children today. How much do you agree or disagree with each of these statements...

Children today are happier than children were 10 years ago?

Q367 [Adve10yr] \*

CARD C2 AGAIN

(And how much do you agree or disagree that...)

Children today are under more pressure from adverts than children were 10 years ago?

Q368 [Edu10yr] \*

CARD C2 AGAIN

(And how much do you agree or disagree that...)

Children today have better educational opportunities than children had 10 years ago?

Q369 [Safel0yr] \*

---

<sup>32</sup> Computed from system clock the first time the education block is encountered

CARD C2 AGAIN

(And how much do you agree or disagree that...)

It is less safe for children today to play outside than it was 10 years ago?

Q370 [YPTIME] \*

CARD C2 AGAIN

Please say whether you agree or disagree with the following statement.  
Young people in this area do not have enough constructive things to do in their spare time.

\* [Happ10yr] TO [YPTIME]

- 1 Agree strongly
- 2 Agree
- 3 Neither agree nor disagree
- 4 Disagree
- 5 Disagree strongly
- 8 (Don't know)
- 9 (Refusal)

Q371 [AdPrsc]

CARD C3

What do you think is the main advantage, if any, when children under three years of age attend pre-school, nursery school or playgroups for about three mornings a week? Please choose your answer from this card.

CODE ONE ONLY

- 1 Enables parent to work
- 2 Enables parent to do other things e.g. training, shopping, free time
- 3 Helps children's educational development (including concentration, memory, language)
- 4 Good for children to interact and socialise with other children
- 5 Good for children to interact and socialise with other adults
- 6 Good for children's behaviour
- 7 Good for children's independence/confidence
- 8 Prepares children for school
- 9 Children enjoy it
- 10 No advantages
- 11 Other (WRITE IN)
- 98 (Don't know)
- 99 (Refusal)

**IF 'Other' AT [AdPrsc]**

Q372 [othspec] \$

WRITE IN OTHER ANSWER GIVEN

Open Question (Maximum of 120 characters)

**ASK ALL**

Q374 [DsPrsc]

CARD C4

What do you think is the main disadvantage, if any, when children under three years of age attend pre-school, nursery school or playgroups for about three mornings a week? Please choose your answer from this card.

CODE ONE ONLY

- 1 Children too young to leave parents
- 2 Children would be unhappy
- 3 Children are less safe in nursery e.g. bullying/child protection/inadequate supervision
- 4 Quality of care is not as good as at home
- 5 Children don't get enough individual attention
- 6 Children pick up bad habits/behaviour
- 7 No disadvantages

8 Other (WRITE IN)  
98 (Don't know)  
99 (Refusal)

**IF 'Other' AT [DsPrsc]**

Q375 [othspec] \$  
WRITE IN OTHER ANSWER GIVEN  
Open Question (Maximum of 120 characters)

**ASK ALL**

Q377 [Noplygrd]  
CARD C5  
How much do you agree or disagree with this statement...  
There are not enough playgrounds for young children in my local area?  
1 Agree strongly  
2 Agree  
3 Neither agree nor disagree  
4 Disagree  
5 Disagree strongly  
8 (Don't know)  
9 (Refusal)

Q378- [Plygrd]  
Q386 CARD C6  
Which, if any, of the statements on this card would you agree with if a  
new playground was built in your local area?  
CODE ALL THAT APPLY  
PROBE: What else?  
Multicoded (Maximum of 9 codes)  
1 It would give younger children in the area more to do [plgYtDo]  
2 It would mean more teenagers hanging around the area [plgTeen]  
3 It would provide a safe place for younger children to play  
outside [plgSafe]  
4 Playgrounds are unsafe for younger children [plgUSaf]  
5 It would be too noisy [plgNsy]  
6 It would result in less crime in the area [plgCrml]  
7 It would result in an increase in crime (e.g. vandalism,  
drinking alcohol, drugs) [plgCrmm]  
8 There would be environmental/traffic problems in building a  
playground [plgTrfc]  
9 Building playgrounds should not be a high priority [plgNP]  
10 None of these [plgNon]  
98 (Don't know)  
99 (Refusal)

Q397 [YPIntr2]  
For the next few questions, I'd like you to think in particular about  
people aged between 10 and 19. So when I use the term young people, 10  
to 19 is the broad age group I'm referring to.

Q398 [YPBehav2] \*  
CARD C7  
Here are some things that people might say about young people in  
Britain. Please tell me how much you agree or disagree with each of  
them.  
Firstly, the behaviour of young people today is no worse than it was in  
the past?

Q399 [GirlsBv2] \*  
CARD C7 AGAIN  
(How much you agree or disagree...)

Girls are more badly behaved than boys nowadays?

Q400 [YPres2] \*  
CARD C7 AGAIN  
(How much you agree or disagree...)  
Most young people are responsible and well-behaved?

\* [YPBehav2] TO [YPres2]  
1 Agree strongly  
2 Agree  
3 Neither agree nor disagree  
4 Disagree  
5 Disagree strongly  
8 (Don't know)  
9 (Refusal)

Q401 [ChildHH] <sup>33</sup> (NOT ON SCREEN)  
Does R live with own child 5-16 - DV  
1 Doesn't live with own child 5-16  
2 Lives with own child 5-16

**ASK IF 'Lives with own child 5-16' AT [ChildHH]**

Q402 [ESUsTerm] \*  
CARD C8  
It has been suggested that school buildings and equipment could be used to provide a number of services for local communities. A range of staff would provide the services, not necessarily teachers. Imagine a school near you started offering such services for the local community. How likely do you think you would be to...  
...use all-day childcare, available from 8am to 6pm, during term time?

Q403 [ESUsHoli] \*  
CARD C8 AGAIN  
(How likely do you think you would be to...)  
...use all-day childcare, available from 8am to 6pm, during school holidays?

Q404 [ESUsHelp] \*  
CARD C8 AGAIN  
(How likely do you think you would be to...)  
...use help and advice services for parents?

\* [ESUsTerm] TO [ESUsHelp]  
1 Very likely  
2 Quite likely  
3 Not very likely  
4 Not at all likely  
8 (Don't know)  
9 (Refusal)

**ASK ALL**

Q405 [trstexam]  
The Department for Education publishes official statistics about how well schools are doing such as students' test and exam results. On a scale of 0 to 10, where 0 is 'do not trust at all' and 10 is 'trust completely', how much do you trust that these figures give a true picture of what is happening in schools?  
Code 95 for 'It depends' (spontaneous only).  
Code 96 for 'Don't know / no opinion' (spontaneous only).

---

<sup>33</sup> Derived from household grid

Code 97 for 'Never heard of students' test and exam results'  
 (spontaneous only)  
 Range: 0 ... 97  
 99 (Refusal)

**IF 0..10 OR 'It depends' AT [trstexam]**

Q406- [TrstERes]<sup>34</sup>  
 Q409 What are your main reasons for saying that?  
 RECORD UP TO 3 MAIN REASONS. PROBE WHERE NECESSARY  
 Multicoded (Maximum of 3 codes)  
 DISTRUST:

|        |                                                                                                                 |           |
|--------|-----------------------------------------------------------------------------------------------------------------|-----------|
| 2      | Don't trust figures, from personal experience                                                                   | [trstd02] |
| 3      | Heard / read something bad about the figures                                                                    | [trstd03] |
| 4      | Figures are difficult to count or measure; not always recorded;<br>unclear or complex definitions               | [trstd04] |
| 5      | ONS has vested interest in results / manipulates production or<br>collection                                    | [trstd05] |
| 6      | The Government has vested interest in the results / interferes<br>in production or collection                   | [trstd06] |
| 7      | The figures are misrepresented or spun by politicians or the<br>media                                           | [trstd07] |
| 8      | Figures alone do not tell whole story / there is more to it<br>than just the figures                            | [trstd08] |
| TRUST: |                                                                                                                 |           |
| 10     | Trust the figures, from personal experience                                                                     | [trstt01] |
| 11     | Heard / read something good about the figures                                                                   | [trstt02] |
| 12     | The figures are easy to count or measure; are always recorded;<br>are based on clear definitions                | [trstt03] |
| 13     | ONS does not have vested interest in the results / does not<br>manipulate production or collection              | [trstt04] |
| 14     | The Government does not have vested interest in the results /<br>does not interfere in production or collection | [trstt05] |
| 15     | Other (please specify)                                                                                          | [trstOth] |
| 16     | Don't understand figures or statistics                                                                          | [trstDU]  |
| 98     | (Don't know)                                                                                                    |           |
| 99     | (Refusal)                                                                                                       |           |

**IF 'Other' IN [TrstERes]**

Q409 [trsteres0]  
 Record other reason. Please recode to reason at previous question, where  
 possible.  
 Open Question (Maximum of 100 characters)

**IF MORE THAN ONE ANSWER AT [TrstERes]**

Q411 [trstem]<sup>35</sup>  
 And which of those is the most important reason?  
 IF NECESSARY, INFORM RESPONDENT OF THE CATEGORIES YOU RECORDED FOR THEIR  
 PREVIOUS ANSWER, CONFIRM THAT THEY AGREE (OR CHANGE ACCORDINGLY), THEN  
 ASK THEM TO CHOOSE WHICH REASON IS MOST IMPORTANT.  
 DISTRUST:

|   |                                                                                                   |
|---|---------------------------------------------------------------------------------------------------|
| 2 | Don't trust figures, from personal experience                                                     |
| 3 | Heard / read something bad about the figures                                                      |
| 4 | Figures are difficult to count or measure; not always recorded; unclear<br>or complex definitions |
| 5 | ONS has vested interest in results / manipulates production or<br>collection                      |

<sup>34</sup> Answer options DISTRUST and TRUST weren't available, they acted as headings on screen, therefore answer categories 1 and 9 aren't present in the dataset.

<sup>35</sup> Answer options DISTRUST and TRUST weren't available, they acted as headings on screen, therefore answer categories 1 and 9 aren't present in the dataset.

6 The Government has vested interest in the results / interferes in  
production or collection  
7 The figures are misrepresented or spun by politicians or the media  
8 Figures alone do not tell whole story / there is more to it than just  
the figures  
TRUST:  
10 Trust the figures, from personal experience  
11 Heard / read something good about the figures  
12 The figures are easy to count or measure; are always recorded; are based  
on clear definitions  
13 ONS does not have vested interest in the results / does not manipulate  
production or collection  
14 The Government does not have vested interest in the results / does not  
interfere in production or collection  
15 Other (please specify)  
16 Don't understand figures or statistics  
98 (Don't know)  
99 (Refusal)

## Health

### ASK ALL

- Q414 [BTime] <sup>36</sup> \$ (NOT ON SCREEN)  
Start time of BHealth block  
Range: 0 ... 1440
- Q415 [NHSSat] \*  
CARD D1  
All in all, how satisfied or dissatisfied would you say you are with the way in which the National Health Service runs nowadays?  
Choose a phrase from this card.
- Q416 [GPSat] \*  
CARD D1 AGAIN  
From your own experience, **or from what you have heard**, please say how satisfied or dissatisfied you are with the way in which each of these parts of the National Health Service runs nowadays:  
First, local doctors or GPs?
- Q417 [DentSat] \*  
CARD D1 AGAIN  
(And how satisfied or dissatisfied are you with the NHS as regards...)  
... National Health Service dentists?
- Q418 [InpatSat] \*  
CARD D1 AGAIN  
(And how satisfied or dissatisfied are you with the NHS as regards...)  
... being in hospital as an **in**-patient?
- Q419 [OutpaSat] \*  
CARD D1 AGAIN  
(And how satisfied or dissatisfied are you with the NHS as regards...)  
... attending hospital as an **out**-patient?
- Q420 [AESat] \*  
CARD D1 AGAIN  
From your own experience, **or from what you have heard**, please say how satisfied or dissatisfied you are with ...  
... Accident and Emergency departments?
- Q421 [NDirSat] \*  
CARD D1 AGAIN  
(And how satisfied or dissatisfied are you with the NHS as regards...)  
... (NHS Direct/NHS 24), the telephone or internet advice service?
- Q422 [Ambsat] \*  
CARD D1 AGAIN  
(And how satisfied or dissatisfied are you with the NHS as regards...)  
... the NHS ambulance service?
- Q423 [diogsat] \*  
CARD D1 AGAIN  
(And how satisfied or dissatisfied are you with the NHS as regards...)  
...diagnostic services, for example: x-rays, scans, hearing tests or heart tests?

---

<sup>36</sup> Computed from system clock the first time the health block is encountered

\* [NHSSat] TO [DiogSat]

- 1 Very satisfied
- 2 Quite satisfied
- 3 Neither satisfied nor dissatisfied
- 4 Quite dissatisfied
- 5 Very dissatisfied
- 8 (Don't know)
- 9 (Refusal)

Q424 [NHSLimit]

It has been suggested that the National Health Service should be available **only to those with lower incomes**. This would mean that contributions and taxes could be lower and most people would then take out medical insurance or pay for health care.

Do you support or oppose this happening?

IF 'SUPPORT' OR 'OPPOSE': 'A lot or a little?'

- 1 Support a lot
- 2 Support a little
- 3 Oppose a little
- 4 Oppose a lot
- 8 (Don't know)
- 9 (Refusal)

Q425 [DentLimt]

Many dentists now provide NHS treatment only to those with lower incomes. This means that other people have to pay the full amount for their dental treatment, or take out private insurance to cover their treatment.

Do you support or oppose this happening?

IF 'SUPPORT' OR 'OPPOSE': 'A lot or a little?'

- 1 Support a lot
- 2 Support a little
- 3 Oppose a little
- 4 Oppose a lot
- 8 (Don't know)
- 9 (Refusal)

Q426 [OutPat1] \*

CARD D2

Now suppose you had a back problem and your GP referred you to a hospital out-patients' department. From what you know or have heard, please say whether you think...

...you would get an appointment within three months?

Q427 [OutPat2] \*

CARD D2 AGAIN

(And please say whether you think ...)

...when you arrived, the doctor would see you within half an hour of your appointment time?

Q428 [OutPat3] \*

CARD D2 AGAIN

(And please say whether you think ...)

...if you wanted to complain about the treatment you received, you would be able to without any fuss or bother?

\* [OutPat1] TO [OutPat3]

- 1 Definitely would
- 2 Probably would
- 3 Probably would not

4       Definitely would not  
8       (Don't know)  
9       (Refusal)

Q429     [SRHealth]  
How is your health in general for someone of your age? Would you say  
that it is ... READ OUT ...

1       ... very good,  
2       fairly good,  
3       fair,  
4       bad,  
5       or, very bad?  
8       (Don't know)  
9       (Refusal)

Q430     [NHS5Yrs] \*  
CARD D3  
Please say how much better or worse you think each of these things has  
been getting **over the last five years...**  
... the general standard of health care on the **NHS**?

Q431     [WtOp5Yrs] \*  
CARD D3 AGAIN  
(Please say how much better or worse you think each of these things has  
been getting **over the last five years**)  
... the time most people wait to get **operations** in NHS hospitals?

Q432     [WtAp5Yrs] \*  
CARD D3 AGAIN  
(Please say how much better or worse you think each of these things has  
been getting **over the last five years...**)  
... the time most people wait to get **outpatients' appointments** in NHS  
hospitals?

Q433     [WtGP5Yrs] \*  
CARD D3 AGAIN  
(Please say how much better or worse you think each of these things has  
been getting **over the last five years...**)  
... the time most people wait at their **GP's surgery** before a doctor sees  
them?

Q434     [WtRf5Yrs] \*  
CARD D3 AGAIN  
Please say how much better or worse you think each of these things has  
been getting **over the last five years...**  
... the time most people wait between being referred by their GP for  
hospital treatment and that treatment starting?

Q435     [Say5Yrs] \*  
CARD D3 AGAIN  
(Please say how much better or worse you think each of these things has  
been getting **over the last five years...**)  
... how much say NHS patients have in decisions about their treatment  
and healthcare?

\* [NHS5Yrs] TO [Say5Yrs]  
1       Much better  
2       Better  
3       About the same  
4       Worse  
5       Much worse

8 (Don't know)  
9 (Refusal)

Q436 [GPaptR] <sup>37</sup>  
Suppose you wanted to see a GP about a back problem that had been  
bothering you for a while but was **not** stopping you from doing the things  
you normally do.  
How long do you think it would be **reasonable** to have to wait for an  
appointment to see a GP about this?  
Please give me your answer in hours, days or weeks.  
INTERVIEWER: FIRST CODE WHETHER THE ANSWER IS GIVEN IN HOURS, DAYS, OR  
WEEKS. THEN CODE AMOUNT OF TIME AT NEXT QUESTION.  
CODE 30 MINUTES AS 0.5 HOURS, 90 MINUTES AS 1.5 HOURS ETC  
IF RESPONDENT SAYS 'Should be seen straight away' CODE 0 HOURS  
1 hours  
2 days  
3 weeks  
8 (Don't know)  
9 (Refusal)

Q437 [GPaptRH] <sup>38</sup>  
INTERVIEWER: ENTER THE NUMBER OF **HOURS**  
CODE 30 MINUTES AS 0.5 HOURS, 90 MINUTES AS 1.5 HOURS  
ROUND **UP** TO THE NEAREST **HALF** HOUR  
IF RESPONDENT SAYS 'Should be seen straight away' CODE 0 HOURS  
Range: 0 ... 97  
9998 (Don't know)  
9999 (Refusal)

Q438 [GPaptRD] <sup>39</sup>  
INTERVIEWER: ENTER THE NUMBER OF **DAYS**  
Range: 1 ... 97  
98 (Don't know)  
99 (Refusal)

Q439 [GPaptRW] <sup>40</sup>  
INTERVIEWER: ENTER THE NUMBER OF **WEEKS**  
Range: 1 ... 97  
98 (Don't know)  
99 (Refusal)

Q440 [GPaptU] <sup>41</sup>  
Now suppose you wanted to see a GP about a bad chest infection that **was**  
stopping you from doing the things you normally do.  
How long do you think it would be **reasonable** to have to wait for an  
appointment to see a GP about this?  
Please give me your answer in hours, days or weeks.  
INTERVIEWER: FIRST CODE WHETHER THE ANSWER IS GIVEN IN HOURS, DAYS, OR  
WEEKS. THEN CODE AMOUNT OF TIME AT NEXT QUESTION.  
CODE 30 MINUTES AS 0.5 HOURS, 90 MINUTES AS 1.5 HOURS  
IF RESPONDENT SAYS 'Should be seen straight away' CODE 0 HOURS  
1 hours  
2 days  
3 weeks  
8 (Don't know)

---

<sup>37</sup> See derived variable [GPaptRC]

<sup>38</sup> See derived variable [GPaptRC]

<sup>39</sup> See derived variable [GPaptRC]

<sup>40</sup> See derived variable [GPaptRC]

<sup>41</sup> See derived variable [GPaptUC]

9 (Refusal)

Q441 [GPaptUH] <sup>42</sup>  
INTERVIEWER: ENTER THE NUMBER OF **HOURS**  
CODE 30 MINUTES AS 0.5 HOURS, 90 MINUTES AS 1.5 HOURS  
ROUND **UP** TO THE NEAREST **HALF** HOUR  
IF RESPONDENT SAYS 'Should be seen straight away' CODE 0 HOURS  
Range: 0 ... 97

9998 (Don't know)

9999 (Refusal)

Q442 [GPaptUD] <sup>43</sup>  
INTERVIEWER: ENTER THE NUMBER OF **DAYS**  
Range: 1 ... 97

98 (Don't know)

99 (Refusal)

Q443 [GPaptUW] <sup>44</sup>  
INTERVIEWER: ENTER THE NUMBER OF **WEEKS**  
Range: 1 ... 97

98 (Don't know)

99 (Refusal)

Q444 [OPaptR] <sup>45</sup>  
Now suppose your GP referred you to a hospital out-patients' department about a back problem that had been bothering you for a while but was **not** stopping you from doing the things you normally do.  
How long do you think it would be **reasonable** to have to wait for an appointment at a hospital outpatients' department about a problem like this?  
Please give me your answer in days, weeks, or months.  
INTERVIEWER: FIRST CODE WHETHER THE ANSWER IS GIVEN IN DAYS, WEEKS OR MONTHS. THEN CODE AMOUNT OF TIME AT NEXT QUESTION.  
IF RESPONDENT SAYS 'Should be seen straight away' CODE 0 DAYS

1 days

2 weeks

3 months

8 (Don't know)

9 (Refusal)

Q445 [OPaptRD] <sup>46</sup>  
INTERVIEWER: ENTER THE NUMBER OF **DAYS**  
IF RESPONDENT SAYS 'Should be seen straight away' CODE 0 DAYS  
Range: 0 ... 97

98 (Don't know)

99 (Refusal)

Q446 [OPaptRW] <sup>47</sup>  
INTERVIEWER: ENTER THE NUMBER OF **WEEKS**  
Range: 1 ... 97

98 (Don't know)

99 (Refusal)

Q447 [OPaptRM] <sup>48</sup>

---

<sup>42</sup> See derived variable [GPaptUC]

<sup>43</sup> See derived variable [GPaptUC]

<sup>44</sup> See derived variable [GPaptUC]

<sup>45</sup> See derived variable [OPaptRC]

<sup>46</sup> See derived variable [OPaptRC]

<sup>47</sup> See derived variable [OPaptRC]

INTERVIEWER: ENTER THE NUMBER OF **MONTHS**  
Range: 1 ... 97  
98 (Don't know)  
99 (Refusal)

Q448 [OpAptU] <sup>49</sup>  
Now suppose your GP referred you to a hospital out-patients' department about a more serious back problem that **was** stopping you from doing the things you normally do.  
How long do you think it would be **reasonable** to have to wait for an appointment at a hospital outpatients' department about a problem like this?  
Please give me your answer in days, weeks, or months.  
INTERVIEWER: FIRST CODE WHETHER THE ANSWER IS GIVEN IN DAYS, WEEKS OR MONTHS. THEN CODE AMOUNT OF TIME AT NEXT QUESTION.  
IF RESPONDENT SAYS 'Should be seen straight away' CODE 0 DAYS  
1 days  
2 weeks  
3 months  
8 (Don't know)  
9 (Refusal)

Q449 [OPaptUD] <sup>50</sup>  
INTERVIEWER: ENTER THE NUMBER OF **DAYS**  
IF RESPONDENT SAYS 'Should be seen straight away' CODE 0 DAYS  
Range: 0 ... 97  
98 (Don't know)  
99 (Refusal)

Q450 [OPaptUW] <sup>51</sup>  
INTERVIEWER: ENTER THE NUMBER OF **WEEKS**  
Range: 1 ... 97  
98 (Don't know)  
99 (Refusal)

Q451 [OPaptUM] <sup>52</sup>  
INTERVIEWER: ENTER THE NUMBER OF **MONTHS**  
Range: 1 ... 97  
98 (Don't know)  
99 (Refusal)

Q452 [AEapt]  
Now suppose you had an accident and were worried that you might have broken your wrist and went to an accident and emergency department for treatment.  
How long do you think it would be **reasonable** to have to wait to be seen by a **doctor** about a problem like this?  
Please give me your answer in hours.  
IF RESPONDENT SAYS 'Should be seen straight away' CODE 0 HOURS  
CODE 30 MINUTES AS 0.5 HOURS, 90 MINUTES AS 1.5 HOURS ETC  
ROUND **UP** TO THE NEAREST **HALF** HOUR  
INTERVIEWER: ENTER THE NUMBER OF **HOURS**  
Range: 0 ... 100  
99998 (Don't know)  
99999 (Refusal)

---

<sup>48</sup> See derived variable [OPaptRC]

<sup>49</sup> See derived variable [OPaptUC]

<sup>50</sup> See derived variable [OPaptUC]

<sup>51</sup> See derived variable [AEaptUC]

<sup>52</sup> See derived variable [OPaptUC]

Q453 [HipAptR] <sup>53</sup>  
 Now suppose you were told by your GP that you needed a hip replacement as you were unable to walk unaided and the hip was causing you pain. How long do you think it would be reasonable to wait from the time your GP referred you to hospital before having an operation to replace your hip?  
 Please give me your answer in days, weeks, or months.  
 INTERVIEWER: FIRST CODE WHETHER THE ANSWER IS GIVEN IN DAYS, WEEKS OR MONTHS. THEN CODE AMOUNT OF TIME AT NEXT QUESTION.

1 days  
 2 weeks  
 3 months  
 8 (Don't know)  
 9 (Refusal)

Q454 [HipAptRD] <sup>54</sup>  
 INTERVIEWER: ENTER THE NUMBER OF **DAYS**  
 IF RESPONDENT SAYS 'Should be seen straight away' CODE 0 DAYS  
 Range: 0 ... 97

98 (Don't know)  
 99 (Refusal)

Q455 [HipAptRW] <sup>55</sup>  
 INTERVIEWER: ENTER THE NUMBER OF **WEEKS**  
 Range: 1 ... 97

98 (Don't know)  
 99 (Refusal)

Q456 [HipAptRM] <sup>56</sup>  
 INTERVIEWER: ENTER THE NUMBER OF **MONTHS**  
 Range: 1 ... 97

98 (Don't know)  
 99 (Refusal)

---

<sup>53</sup> See derived variable [HIPAptRC]

<sup>54</sup> See derived variable [HIPAptRC]

<sup>55</sup> See derived variable [HIPAptRC]

<sup>56</sup> See derived variable [HIPAptRC]

## Transport

### ASK ALL

Q459 [BTime] <sup>57</sup> \$ (**NOT ON SCREEN**)

Start time of BTransp block

Range: 0 ... 1440

Q460 [TRFPB6U] \*

CARD E1

Now thinking about traffic and transport problems, how serious a problem **for you** is congestion on motorways?

Q461 [TRFPB9U] \*

CARD E1 AGAIN

(And how serious a problem **for you** is ...)  
traffic congestion in towns and cities?

Q462 [TrfPb10u] \*

CARD E1 AGAIN

(And how serious a problem **for you** are ...)  
exhaust fumes from traffic in towns and cities?

\* [TRFPB6U] TO [TrfPb10u]

1 A very serious problem

2 A serious problem

3 Not a very serious problem

4 Not a problem at all

8 (Don't know)

9 (Refusal)

Q463 [TrfConc1] \*

CARD E2

Transport like cars, buses, trains and planes can affect the environment in a number of ways.

How **concerned** are you about damage to the countryside from building roads?

Q464 [TrfConc2] \*

CARD E2 AGAIN

And how **concerned** are you about the effect of transport on climate change?

Q465 [TrfConc3] \*

CARD E2 AGAIN

And how **concerned** are you about exhaust fumes from traffic?

\* [TrfConc1] TO [TrfConc3]

1 Very concerned

2 Fairly concerned

3 Not very concerned

4 Not at all concerned

8 (Don't know)

9 (Refusal)

Q466 [DRIVE]

May I just check, do you yourself drive a car at all these days?

1 Yes

2 No

---

57 Computed from system clock the first time the transport block is encountered

8 (Don't know)  
9 (Refusal)

**IF 'Yes' AT [Drive]**

Q467 [DRIVMIL]  
CARD E3  
How many miles have you personally driven in the last 12 months?  
1 3,000 miles or less  
2 3,001 to 5,000 miles  
3 5,001 to 7,000 miles  
4 7,001 to 10,000 miles  
5 10,001 miles or more  
8 (Don't know)  
9 (Refusal)

**ASK ALL**

Q468 [CarNum]  
How many, if any, cars or vans does your household own or have the regular use of?  
Range: 0 ... 96  
98 (Don't know)  
99 (Refusal)

**IF 'Yes' AT [DRIVE] AND ONE OR MORE AT [CarNum]**

Q469 [MainDri]  
Are you the main driver of (*this/either of these/any of these*) vehicle(s)?  
By main driver we mean the person who does the most mileage in the vehicle over a year.  
1 Yes  
2 No  
8 (Don't know)  
9 (Refusal)

**ASK ALL**

Q470 [Bikeown]  
Do you own, or have access to, a bicycle that is in good enough condition for riding?  
INTERVIEWER: code yes even if respondent says they have one but that they wouldn't use it  
1 Yes  
2 No  
8 (Don't know)  
9 (Refusal)

**IF 'Yes' AT [DRIVE]**

Q471 [TRAVEL1] \*  
CARD E4  
How often nowadays do you **usually** travel ...by car as a driver?

**ASK ALL**

Q472 [TRAVEL2] \*  
CARD E4 (AGAIN)  
(How often nowadays do you **usually**) ...travel by car as a passenger?

Q473 [TRAVEL3] \*  
CARD E4 AGAIN  
(How often nowadays do you **usually**) ...travel by local bus?

Q474 [TRAVEL4a] \*  
CARD E4 AGAIN

(How often nowadays do you **usually**) ...travel by train (not including underground, tram or light rail)?

\* [TRAVEL1] TO [TRAVEL4a]

- 1 Every day or nearly every day
- 2 2-5 days a week
- 3 Once a week
- 4 Less often but at least once a month
- 5 Less often than that
- 6 Never nowadays
- 8 (Don't know)
- 9 (Refusal)

Q475 [AirTrvl]

And how many trips did you make by plane during the last 12 months?  
Please count the outward and return flight and any transfers as one trip.

INTERVIEWER WRITE IN ANSWER

ACCEPT BEST ESTIMATE IF NECESSARY

CODE 'NONE' AS 0

Range: 0 ... 996

998 (Don't know)

999 (Refusal)

**IF NOT 'Never nowadays' AT [Travel1]**

Q476- [CarPark]

Q480 CARD E5

In the last 12 months, has a lack of available car parking space led you to alter a journey in any of the ways listed on this card?

CODE ALL THAT APPLY

PROMPT: Which others?

Multicoded (Maximum of 5 codes)

- 1 I used public transport rather than car [CarPPub]
- 2 I changed my destination [CarPChD]
- 3 I chose not to make the journey at all [CarPNoJ]
- 97 I changed my journey in another way (PLEASE SAY WHAT) [CarPOth]
- 5 I have not made any changes to a journey [CarPNoCh]
- 98 (Don't know)
- 99 (Refusal)

**IF 'I changed my journey in another way' AT [CarPark]**

Q481 [othspec] \$

WRITE IN OTHER ANSWER GIVEN

Open Question (Maximum of 120 characters)

**ASK ALL**

Q488 [CliCar] \*

CARD E6

Please tell me how much you agree or disagree with each of these statements:

The current level of **car use** has a serious effect on climate change.

Q489 [CliPlane] \*

CARD E6 AGAIN

(Please tell me how much you agree or disagree with this statement)

The current level of **air travel** has a serious effect on climate change.

\* [CliCar] AND [CliPlane]

- 1 Agree strongly
- 2 Agree
- 3 Neither agree nor disagree

4 Disagree  
5 Disagree strongly  
8 (Don't know)  
9 (Refusal)

**IF 'Yes' AT [DRIVE]**

Q490 [EnvWalk2] \*  
CARD E7  
Compared with two or three years ago, do you nowadays do any of these things more often than you used to, for the sake of the environment...  
...Walking rather than driving to local shops and services?

Q491 [EnvPCar2] \*  
CARD E7 AGAIN  
(Compared with two or three years ago, do you nowadays do any of these things more often than you used to, for the sake of the environment...)  
...Using public transport instead of a car?

Q492 [EnvSped2] \*  
CARD E7 AGAIN  
(Compared with two or three years ago, do you nowadays do any of these things more often than you used to, for the sake of the environment...)  
...Cutting down your driving speed to save petrol?

Q493 [EnvOuts2] \*  
CARD E7 AGAIN  
And compared with two or three years ago, do you nowadays do any of these things more often than you used to, for the sake of the environment...  
...Making fewer trips to out of town shopping centres to save petrol?

Q494 [EnvLift2] \*  
CARD E7 AGAIN  
(Compared with two or three years ago, do you nowadays do any of these things more often than you used to, for the sake of the environment...)  
...Giving people lifts, or taking lifts, to cut down on using cars?

Q495 [EnvPOut2] \*  
CARD E7 AGAIN  
(Compared with two or three years ago, do you nowadays do any of these things more often than you used to, for the sake of the environment...)  
...Parking your car on the outskirts of town and using public transport to go to the centre?

\* [EnvWalk2] TO [EnvPOut2]

1 No  
2 A bit more often nowadays  
3 A lot more often nowadays  
8 (Don't know)  
9 (Refusal)

## Housing

### ASK ALL

Q497 [BTime] <sup>58</sup> \$ (NOT ON SCREEN)  
Start time of BHouse block  
Range: 0 ... 1440

Q498 [AreaSat]  
CARD F1  
Overall, how satisfied or dissatisfied are you with your local area as a place to live?  
1 Very satisfied  
2 Fairly satisfied  
3 Neither satisfied nor dissatisfied  
4 Fairly dissatisfied  
5 Very dissatisfied  
8 (Don't know)  
9 (Refusal)

Q499 [HomsBult]  
CARD F2  
Would you support or oppose more homes being built in your local area?  
1 Support strongly  
2 Support  
3 Neither support nor oppose  
4 Oppose  
5 Oppose strongly  
6 [SPONTANEOUS ONLY - It depends]  
8 (Don't know)  
9 (Refusal)

### IF 'Neither support nor oppose' OR 'oppose (strongly)' AT [HomsBult]

Q500 [YSupblt]  
CARD F3  
Sometimes when new homes are built there are advantages to local residents. Which one, if any, of the following advantages would be the main thing that would make you support homes being built in your area?  
1 More green spaces/parks were created or existing ones improved  
2 More schools built or existing schools improved  
3 More shops or supermarkets built or existing ones improved  
4 Transport links improved  
5 More medical facilities built or existing ones improved  
6 More employment opportunities created  
7 Library built or existing one improved  
8 More leisure facilities built or existing ones improved  
9 Financial incentives to existing residents were provided  
10 Other (WRITE IN)  
11 None of these  
12 [SPONTANEOUS ONLY: It Depends]  
98 (Don't know)  
99 (Refusal)

### IF 'Other' AT [YSupblt]

Q501 [othspec] \$  
WRITE IN OTHER ANSWER GIVEN  
Open Question (Maximum of 120 characters)

### ASK ALL

---

58 Computed from system clock the first time the housing block is encountered

Q503- [NdtypFW]  
Q509 CARD F4  
If new homes were to be built in your local area, which, if any, of these types of homes do you think are most needed?  
CODE ALL THAT APPLY  
Multicoded (Maximum of 7 codes)

|   |                          |            |
|---|--------------------------|------------|
| 1 | No new homes needed      | [NTypNo]   |
| 2 | Flats/Maisonettes        | [NTypflt]  |
| 3 | 1 or 2 bedroom houses    | [NTyp12b]  |
| 4 | 3 or 4 bedroom houses    | [NTyp34b]  |
| 5 | 5 or more bedroom houses | [NTyp5b]   |
| 6 | Bungalows                | [NTypbung] |
| 7 | Other (WRITE IN)         | [NTypOth]  |
| 8 | (Don't know)             |            |
| 9 | (Refusal)                |            |

**IF 'Other' IN [NdtypeFW]**

Q510 [othspec] \$  
WRITE IN OTHER ANSWER GIVEN  
Open Question (Maximum of 120 characters)

**ASK ALL**

Q519- [NdtenFW]  
Q524 CARD F5  
And, if new homes were to be built in your local area, which, if any, of these types of homes do you think are most needed?  
CODE ALL THAT APPLY

|   |                                                              |           |
|---|--------------------------------------------------------------|-----------|
|   | Multicoded (Maximum of 6 codes)                              |           |
| 1 | No new homes needed                                          | [NTenNo]  |
| 2 | Homes to buy                                                 | [NTenbuy] |
| 3 | Homes to rent from private landlords                         | [NTenPR]  |
| 4 | Homes to rent from local authorities or housing associations | [NTenSR]  |
| 5 | Homes to part-own and part-rent                              | [NTenSh]  |
| 6 | Other (WRITE IN)                                             | [NTenOth] |
| 8 | (Don't know)                                                 |           |
| 9 | (Refusal)                                                    |           |

**IF 'Other' IN [NdtenFW]**

Q525 [othspec] \$  
WRITE IN OTHER ANSWER GIVEN  
Open Question (Maximum of 120 characters)

**ASK ALL**

Q533 [Tenure7] <sup>59</sup>  
Does your household own or rent this accommodation?  
PROBE IF NECESSARY  
IF OWNS: Outright or on a mortgage?  
IF RENTS: From whom?

|   |                                                                              |
|---|------------------------------------------------------------------------------|
| 1 | OWNS: Owns outright                                                          |
| 2 | OWNS: Buying on mortgage                                                     |
| 3 | Shared ownership (e.g. part rent, part buy)                                  |
| 4 | RENTS: local authority / council                                             |
| 5 | RENTS: Housing Association/charitable trust/new town development corporation |
| 6 | RENTS: property company                                                      |
| 7 | RENTS: employer of a household member                                        |
| 8 | RENTS: other organisation                                                    |

---

<sup>59</sup> See also derived variable [Tenure2].

9 RENTS: relative/friend (before living here) of a household member  
10 RENTS: other individual/private landlord  
11 Rent free, squatting  
97 Other (WRITE IN)  
98 (Don't know)  
99 (Refusal)

**IF 'Other' AT [Tenure7]**

Q534 [othspec] \$  
WRITE IN OTHER ANSWER GIVEN  
Open Question (Maximum of 120 characters)

**ASK ALL**

Q536 [Tenure2] <sup>60</sup> (NOT ON SCREEN)  
Housing tenure <summary> dv  
1 Owned/being bought  
2 Rented (LA)  
3 Rented (HA/Trust/New Town)  
4 Rented (other)  
5 Rent free, squatting etc  
9 No information  
98 (Don't know)  
99 (Refusal)

**IF 'OWNS:...' AT [Tenure7]**

Q537 [BuyFLAHA]  
Did you, or the person responsible for the mortgage, buy your home from  
the local authority or Housing Association as a tenant?  
If yes, was that from the Local Authority or Housing Association?  
1 Yes - from Local Authority  
2 Yes - from Housing Association  
3 No  
8 (Don't know)  
9 (Refusal)

**ASK ALL**

Q538 [ACCTYP]  
Would I be right in describing this accommodation as a...  
1 ...detached house or bungalow  
2 ...semi-detached house or bungalow  
3 ...terraced house or bungalow  
4 ...self-contained maisonette (inc. tenement block)  
5 ...self-contained converted flat/maisonette  
6 ...purpose built high rise flat (6 floors or more)  
7 ...purpose built low rise flat  
8 ...room(s), not self-contained?  
9 Other (PLEASE SAY WHAT)  
98 (Don't know)  
99 (Refusal)

**IF 'Other' AT [ACCTYP]**

Q539 [othspec] \$  
WRITE IN OTHER ANSWER GIVEN  
Open Question (Maximum of 120 characters)

**ASK ALL**

Q541 [RentPrf1]  
If you had a **free** choice would you choose to rent accommodation, or  
would you choose to buy?

---

<sup>60</sup> Derived from [Tenure1].

1 Would choose to rent  
2 Would choose to buy  
8 (Don't know)  
9 (Refusal)

**IF 'RENTS:...' AT [Tenure7]**

Q542 [RentExpt]  
And apart from what you would like, do you expect to buy a house or a flat in the next two years, or not?  
IF EXPECTS TO BUY PRESENT HOUSE/FLAT, CODE 1.  
1 Yes, expect to buy  
2 No, do not expect to buy  
8 (Don't know)  
9 (Refusal)

**ASK ALL**

Q543 [AdvOwnR]  
CARD F6  
If you had to choose just one of the things on this card, which one would you say is the main advantage of owning a home rather than renting it?  
1 Gives you the freedom to do what you want with it  
2 Works out less expensive than paying rent  
3 Is more secure in the long-term than renting  
4 Is something to leave to your family  
5 Is a good investment  
6 Something else (WRITE IN)  
7 No advantage  
8 (Don't know)  
9 (Refusal)

**IF 'Other' AT [AdvOwnR]**

Q544 [othspec] \$  
WRITE IN OTHER ANSWER GIVEN  
Open Question (Maximum of 120 characters)

**ASK ALL**

Q546 [DisOwnR]  
CARD F7  
If you had to choose just one of the things on this card, which one would you say is the main disadvantage of owning a home rather than renting it?  
1 It is restrictive and hard to move  
2 It is expensive  
3 It is not a good investment  
4 Buying a home is too complicated  
5 Difficult keeping up with mortgage repayments  
6 Need to have secure job  
7 Difficult to buy in nice areas  
8 Need to make repairs yourself  
9 Something else (WRITE IN)  
10 No disadvantage  
98 (Don't know)  
99 (Refusal)

**IF 'Something else' AT [DisOwnR]**

Q547 [othspec] \$  
WRITE IN OTHER ANSWER GIVEN  
Open Question (Maximum of 120 characters)

**ASK ALL**

Q549 [AdvRntO]  
CARD F8  
And if you had to choose just one of the things on this card, which one would you say is the main advantage of renting a home rather than owning it?

- 1 Gives you flexibility if you need to move at short notice
- 2 Gives you greater choice over where to live
- 3 Means someone else is responsible for repairs and maintenance
- 4 Is less risky than owning a home
- 5 Is less responsibility than owning a home
- 6 Means you don't have to worry about taking on a mortgage
- 7 There are less upfront costs
- 8 Something else (WRITE IN)
- 9 No advantage
- 98 (Don't know)
- 99 (Refusal)

**IF 'Something else' AT [AdvRntO]**

Q550 [othspec] \$  
WRITE IN OTHER ANSWER GIVEN  
Open Question (Maximum of 120 characters)

**ASK ALL**

Q552 [AdPRSR]  
CARD F9  
When people rent accommodation some rent from a private landlord and some rent social housing from a local authority or housing association. From what you know or have heard, if you had to choose just one of the things on this card, which one would you say is the main advantage of renting a home privately as opposed to renting from a local authority or housing association?

- 1 No social stigma
- 2 Get repairs done/less responsibility for upkeep
- 3 Wider choice of location
- 4 Properties more easily available
- 5 More flexible tenancy arrangements
- 6 Properties are in better condition
- 7 Better choice of types of properties available (house/flat, etc.)
- 8 Other (WRITE IN)
- 9 No advantage
- 98 (Don't know)
- 99 (Refusal)

**IF 'Other' AT [AdPRSR]**

Q553 [othspec] \$  
WRITE IN OTHER ANSWER GIVEN  
Open Question (Maximum of 120 characters)

**ASK ALL**

Q555 [DsPrSr]  
CARD F10  
And from what you know or have heard, if you had to choose just one of the things on this card, which one would you say is the main disadvantage of renting a home privately as opposed to renting from a local authority or housing association?

- 1 Restrictions around the length of time you can stay living in the property
- 2 Rents are too high
- 3 Problems with landlords or letting agents
- 4 Can't invest in the housing market - lack of security for the future

5 Little choice over what happens to the property  
6 Other (WRITE IN)  
7 No disadvantage  
8 (Don't know)  
9 (Refusal)

**IF 'Other' AT [DsPrSr]**

Q556 [othspec] \$  
WRITE IN OTHER ANSWER GIVEN  
Open Question (Maximum of 120 characters)

**ASK ALL**

Q558 [AdSrPr]  
CARD F11  
(When people rent accommodation some rent from a private landlord and some rent social housing from a local authority or housing association.)  
Again, from what you know or have heard, if you had to choose just one of the things on this card, which one would you say is the main advantage of renting from a local authority or housing association as opposed to renting a home privately?  
1 Option to purchase property through a scheme such as Right to Buy  
2 Sense of community and community facilities  
3 More freedom to do what I want with the property/more able to get involved in decisions about my home  
4 Properties are in better condition  
5 More secure tenancy arrangements  
6 Good repairs and maintenance service  
7 More reliable landlords  
8 Low/affordable rents  
9 Other (WRITE IN)  
10 No advantage  
98 (Don't know)  
99 (Refusal)

**IF 'Other' AT [AdSrPr]**

Q559 [othspec] \$  
WRITE IN OTHER ANSWER GIVEN  
Open Question (Maximum of 120 characters)

**ASK ALL**

Q561 [DsSrPr]  
CARD F12  
And from what you know or have heard, if you had to choose just one of the things on this card, which one would you say is the main disadvantage of renting from a local authority or housing association as opposed to renting a home privately?  
1 Anti-social behaviour problems on estates  
2 Difficult to move to other types of property when needs change  
3 Can't invest in the housing market - lack of security for the future  
4 Don't like the types of properties  
5 Homes are kept in a poor state of repair  
6 Little choice over location  
7 Little choice over the type of property tenants can live in  
8 Poor repairs and maintenance service  
9 Little choice over what happens to the property  
10 Anti-social neighbours  
11 Rents are too high  
12 The location of their homes  
13 Other (WRITE IN)

14 No disadvantage  
98 (Don't know)  
99 (Refusal)

**IF 'Other' AT [DsSrPr]**

Q562 [othspec] \$  
WRITE IN OTHER ANSWER GIVEN  
Open Question (Maximum of 120 characters)

**IF RENTING PRIVATELY, 'Rent free' OR 'Other' AT [Tenure7]**

Q564 [LikeSR] \*  
CARD F13  
I am now going to ask you about your views on social housing, by which I mean accommodation that is rented from either a local authority or a housing association.  
We are interested in your views even if you don't know much about it. From what you know or have heard, do you agree or disagree with the following...  
I would like to live in a Housing Association or local authority property if I could get it

Q565 [NeligSR] \*  
CARD F13 AGAIN  
(How much do you agree or disagree...)  
I do not think I would be eligible for a housing association or local authority property

\* [LikeSR] AND [NeligSR]

1 Agree strongly  
2 Agree  
3 Neither agree nor disagree  
4 Disagree  
5 Disagree strongly  
8 (Don't know)  
9 (Refusal)

**ASK ALL**

Q566 [PriSracc]  
CARD F14  
Which one of these factors should be treated as a priority in deciding who should be allocated housing rented from a local authority or housing association?  
1 Living in overcrowded accommodation  
2 Not being able to afford to buy or rent independently  
3 Being on a very low income  
4 Being a key worker such as a nurse or a teacher  
5 [SPONTANEOUS ONLY: None of these]  
6 [SPONTANEOUS ONLY: Other (PLEASE SAY WHO)]  
8 (Don't know)  
9 (Refusal)

**IF 'Other' AT [PriSracc]**

Q567 [othspec] \$  
WRITE IN OTHER ANSWER GIVEN  
Open Question (Maximum of 120 characters)

**IF 'RENTS:...' AT [Tenure7]**

Q569 [AwarShar]  
Some people these days are becoming part-owners of their homes which means they buy part of their home while paying rent on the rest. That is to say they own a share of it. Have you heard of this?

1 Yes  
2 No  
8 (Don't know)  
9 (Refusal)

Q570 [ConsSHar]  
(Some people these days are becoming part-owners of their homes which means they buy part of their home while paying rent on the rest. That is to say they own a share of it.)  
If this scheme were available to you, would you consider becoming a shared-owner of a home?

1 Yes  
2 Perhaps/depends  
3 No  
4 Already part-rent part-buy home  
8 (Don't know)  
9 (Refusal)

**ASK ALL**

Q571 [HsPrilvl]  
CARD F15  
Do you think house prices in your area are too high, too low or about right?

1 Much too high  
2 Slightly too high  
3 About right  
4 Slightly too low  
5 Much too low  
8 (Don't know)  
9 (Refusal)

Q572 [HsePExpt]  
In a year from now, do you expect house prices in your area to have gone up, to have stayed the same, or to have gone down?  
IF 'GONE UP' OR 'GONE DOWN': By a lot or a little?

1 To have gone up by a lot  
2 To have gone up by a little  
3 To have stayed the same  
4 To have gone down by a little  
5 To have gone down by a lot  
8 (Don't know)  
9 (Refusal)

**IF 'OWNS:...' AT [Tenure7]**

Q573 [EasySell]  
CARD F16  
If you were to put your home on the market, how easy or difficult do you think it would be to sell under present market conditions?

1 Very easy  
2 Fairly easy  
3 Neither easy nor difficult  
4 Fairly difficult  
5 Very difficult  
8 (Don't know)  
9 (Refusal)

**ASK ALL**

Q574 [Gvmakaff]  
CARD F17  
If the government were going to do something to make homes more affordable, what do you think the most useful action would be?

1 Allow developers to build more homes  
2 Get banks to increase access to mortgages  
3 Give more money to housing associations and local authorities to build  
social homes for those on low incomes  
4 Make it more expensive to purchase second homes  
5 Give some sort of financial assistance to first time buyers  
6 Give more money to shared ownership schemes e.g. Key Worker/Homebuy  
schemes to allow people to buy a part share in a property  
7 Something else (WRITE IN)  
8 Do nothing  
98 (Don't know)  
99 (Refusal)

**IF 'Something else' AT [Gvmakaff]**

Q575 [othspec] \$  
WRITE IN OTHER ANSWER GIVEN  
Open Question (Maximum of 120 characters)

**ASK IF 'OWNS: buying on mortgage' AT [Tenure7]**

Q577 [EaseMort]  
Some people easily afford their mortgage repayments, others find it  
difficult to pay. How easy or difficult is it for your household to pay  
the mortgage payments? Is it...READ OUT...  
1 ...very easy,  
2 fairly easy,  
3 fairly difficult,  
4 or very difficult?  
8 (Don't know)  
9 (Refusal)

Q578 [WorrMort]  
Are you worried by the possibility of not being able to pay the mortgage  
and having your home reposessed?  
IF YES: Does this worry you a great deal or not very much?  
1 Yes - Worries a great deal  
2 Yes - Not very much  
3 No  
8 (Don't know)  
9 (Refusal)

**ASK IF 'RENTS:...' AT [Tenure7]**

Q579 [Rentlvl]  
CARD F18  
Do you think rent levels in your area are too high, too low or about  
right?  
1 Much too high  
2 Slightly too high  
3 About right  
4 Slightly too low  
5 Much too low  
8 (Don't know)  
9 (Refusal)

Q580 [EaseRent]  
Some people easily afford to pay their rent, others find it difficult to  
pay. How easy or difficult is it for your households to afford the rent?  
Is it...READ OUT...  
1 ...very easy,  
2 fairly easy,  
3 fairly difficult,  
4 or very difficult?

5 EDIT ONLY: Rent covered by benefits  
8 (Don't know)  
9 (Refusal)

**ASK ALL**

Q581 [SupRepos]  
CARD F19  
To what extent do you think that the Government should support people who are at risk of having their home repossessed? Please choose the statement that comes closest to your views.  
1 The government should provide no assistance  
2 The government should provide advice but no financial assistance  
3 The government should provide both advice and financial assistance  
8 (Don't know)  
9 (Refusal)

Q582 [GvSpRepo]  
CARD F20  
Which one of these factors, if any, should the Government treat as a priority in deciding who to support if they are at risk of having their home repossessed?  
1 job loss or being made redundant  
2 relationship breakdown  
3 debts  
4 reduced income because of less work available  
5 rising mortgage costs  
6 self-employed business failure  
7 Other (PLEASE SAY WHO)  
8 The government should not support those at risk of having their homes repossessed  
98 (Don't know)  
99 (Refusal)

**IF 'Other' AT [GvSpRepo]**

Q583 [othspec] \$  
WRITE IN OTHER ANSWER GIVEN  
Open Question (Maximum of 120 characters)

**ASK ALL**

Q585 [ImpEnrgy]  
Would you consider making improvements to your home to make it more energy efficient? By energy efficient we mean any improvements that reduce the amount of energy you need to use to meet your current heating, hot water or lighting needs.  
1 Yes  
2 No  
3 [SPONTANEOUS ONLY: Depends/Maybe]  
4 [SPONTANEOUS ONLY: Nothing else needs to be done]  
8 (Don't know)  
9 (Refusal)

**IF 'Yes' AT [ImpEnrgy]**

Q586 [YImpEnrgy]  
CARD F21  
What is the main reason you would consider making improvements to your home to make it more energy efficient?  
(By energy efficient we mean any improvements that reduce the amount of energy you need to use to meet your current heating, hot water or lighting needs.)  
1 To make my home more comfortable  
2 To help reduce the impact on the environment

3 To save money on my fuel bills  
4 Other (WRITE IN)  
8 (Don't know)  
9 (Refusal)

**IF 'Other' AT [YImpEngy]**

Q587 [othspec] \$  
WRITE IN OTHER ANSWER GIVEN  
Open Question (Maximum of 120 characters)

**ASK ALL**

Q589- [StpEFW]

Q591 CARD F22

Are any of these things stopping you from making improvements to your home to make it more energy efficient?

(By energy efficient we mean any improvements that reduce the amount of energy you need to use to meet your current heating, hot water or lighting needs.)

CODE UP TO 3 ANSWERS

Multicoded (Maximum of 3 codes)

|    |                                                                         |            |
|----|-------------------------------------------------------------------------|------------|
| 1  | No, nothing is stopping me/nothing needs to be done                     | [StEnNoth] |
| 2  | It is too expensive                                                     | [StEnExp]  |
| 3  | It wouldn't save me money                                               | [StEnnosv] |
| 4  | It is not my responsibility                                             | [StEnnors] |
| 5  | I don't have the time to make these changes                             | [StEnnoti] |
| 6  | I don't know enough about it                                            | [StEnnokn] |
| 7  | I don't trust the people selling me these improvements                  | [StEntrsl] |
| 8  | I don't trust the people installing these improvements to do a good job | [StEntrin] |
| 9  | I don't think it would make a difference to the environment             | [StEnnodf] |
| 10 | It might spoil the appearance of my home                                | [StEnspap] |
| 11 | It might reduce the value of my property                                | [StEnrdvl] |
| 12 | Something else (WRITE IN)                                               | [StEnOthr] |
| 98 | (Don't know)                                                            |            |
| 99 | (Refusal)                                                               |            |

**IF 'Something else' IN [StpEFW]**

Q592 [othspec] \$  
WRITE IN OTHER ANSWER GIVEN  
Open Question (Maximum of 120 characters)

**ASK IF MORE THAN ONE ANSWER GIVEN AT [StpEFW]**

Q606 [StpEngM]

CARD F22

And what is the main thing stopping you from making improvements to your home to make it more energy efficient?

(By energy efficient we mean any improvements that reduce the amount of energy you need to use to meet your current heating, hot water or lighting needs.)

|    |                                                                         |
|----|-------------------------------------------------------------------------|
| 2  | It is too expensive                                                     |
| 3  | It wouldn't save me money                                               |
| 4  | It is not my responsibility                                             |
| 5  | I don't have the time to make these changes                             |
| 6  | I don't know enough about it                                            |
| 7  | I don't trust the people selling me these improvements                  |
| 8  | I don't trust the people installing these improvements to do a good job |
| 9  | I don't think it would make a difference to the environment             |
| 10 | It might spoil the appearance of my home                                |
| 11 | It might reduce the value of my property                                |
| 12 | Something else (WRITE IN)                                               |
| 98 | (Don't know)                                                            |

99 (Refusal)

**IF 'Something else' AT [StpEngM]**  
Q607 [othspec] \$  
WRITE IN OTHER ANSWER GIVEN  
Open Question (Maximum of 120 characters)

## School choice (versions A and B)

### VERSIONS A AND B: ASK ALL

Q610 [BTime] <sup>61</sup> \$ (NOT ON SCREEN)  
Start time of BSchChc block  
Range: 0 ... 1440

Q611 [SchSelec] \$ <sup>62</sup>  
CARD G1  
Which of the following statements comes closest to your views about what kind of **secondary** school children should go to?  
1 Children should go to a different kind of secondary school, according to how well they do at primary school  
2 All children should go to the same kind of secondary school, no matter how well or badly they do at primary school  
8 (Don't know)  
9 (Refusal)

Q612 [SameEduc]  
Should the quality of education be the same for all children, or should parents who can afford it be able to pay for better education?  
1 Same for everyone  
2 Able to pay for better  
8 (Don't know)  
9 (Refusal)

Q613 [PrivEfct]  
If there were fewer private schools in Britain today do you think, on the whole, that state schools would ... READ OUT ...  
1 Benefit  
2 Suffer  
3 or would it make no difference?  
8 (Don't know)  
9 (Refusal)

Q614 [Vouch]  
CARD G2  
It has been suggested that the government gives all parents a 'voucher', which they can use to 'buy' their children's education at whatever state school they want to send them to. Schools would only get paid for the number of pupils they teach. Please say how much you support or oppose this idea.  
1 Strongly support  
2 Support  
3 Neither support nor oppose  
4 Oppose  
5 Strongly oppose  
8 (Don't know)  
9 (Refusal)

Q615 [SchAffd]  
CARD G3  
Say a parent on a low income wanted to send a child of theirs to a school some distance from their home, because they thought that school

---

<sup>61</sup> Computed from system clock the first time the School Choice block is encountered

<sup>62</sup> Asked here for School Choice module, but data moved to Social Security and Welfare Module Q320, where the same question was asked for version C

was better than the local school. But they cannot afford to pay the bus fare every day. What do you think should happen?

- 1 The child should go to a local school
- 2 The government should pay the bus fare
- 8 (Don't know)
- 9 (Refusal)

Q616 [PHelpSc1] \*  
CARD G4

When selecting pupils, schools take account of different factors such as the pupil's ability, their religion, or where they live. There are sometimes things parents can do to improve their child's chances of gaining a place at a particular school. I'm going to read out a list of actions parents might take to do this. For each one, please say how much you approve or disapprove.  
Helping children revise for exams or tests?

Q617 [PHelpSc2] \*  
CARD G4 AGAIN  
(How much do you approve or disapprove of)  
Paying for a private tutor?

Q618 [PHelpSc3] \*  
CARD G4 AGAIN  
(How much do you approve or disapprove of)  
Starting to get involved in local religious activities to help get their children into a high performing faith school

Q619 [PHelpSc4] \*  
CARD G4 AGAIN  
And how much do you approve or disapprove of parents...moving house to be nearer a higher-performing secondary school

Q620 [PHelpSc5] \*  
CARD G4 AGAIN  
(How much do you approve or disapprove of)  
Using a relative's address in order to be nearer a higher-performing secondary school

Q621 [PHelpSc6] \*  
CARD G4 AGAIN  
(How much do you approve or disapprove of)  
Renting a second home in order to be nearer a higher-performing secondary school but not generally living there

- \* [PHelpSc1] TO [PHelpSc6]
- 1 Strongly approve
  - 2 Approve
  - 3 Neither approve nor disapprove
  - 4 Disapprove
  - 5 Strongly disapprove
  - 8 (Don't know)
  - 9 (Refusal)

Q622 [GoStatSc]  
CARD G5  
Please say how much you agree or disagree with the following statement.  
In Britain today, parents in general should send their children to their nearest state school

- 1 Agree strongly

2 Agree  
3 Neither agree nor disagree  
4 Disagree  
5 Disagree strongly  
8 (Don't know)  
9 (Refusal)

**IF 'Neither...' OR 'Disagree (strongly)' AT [GoStatSc]**

Q623 [GoStaQua]  
CARD G5 AGAIN  
What if the quality of different schools and their social mix of pupils was more equal? Would you agree that parents in general should then send their children to their nearest state school?  
1 Agree strongly  
2 Agree  
3 Neither agree nor disagree  
4 Disagree  
5 Disagree strongly  
8 (Don't know)  
9 (Refusal)

**VERSIONS A AND B: ASK ALL**

Q624 [ChFirst]  
CARD G6  
Some people think it is important to put your child first when choosing a secondary school whilst other people think it is also important to consider all children's needs equally, including your own child's. Which of the statements on this card comes closest to your view?  
1 Put your child first and leave other parents to do the same  
2 Put your child first but also consider other children's needs and interests  
3 Consider all children's needs and interests equally, including your own child's  
8 (Don't know)  
9 (Refusal)

Q625 [ScNotGo1] \*  
CARD G7  
Some people say that parents should always send their children to their nearest state secondary school. Others say that such ideas are fine in an ideal world, but that decisions are more complex in the real world. How acceptable do you think each of these reasons are for not sending a child to their nearest state secondary school...  
The nearest state school's exam results aren't as good as other schools?

Q626 [ScNotGo2] \*  
CARD G7 AGAIN  
(how acceptable do you think it is to not send a child to the nearest state school because...)  
The nearest state school has many pupils from backgrounds different to the child's own background?

Q627 [ScNotGo3] \*  
CARD G7 AGAIN  
(how acceptable do you think it is to not send a child to the nearest state school because...)  
The child is particularly academic?

Q628 [ScNotGo4] \*

CARD G7 AGAIN

And how acceptable do you think it is to not send a child to the nearest state school because... The child has a particular gift for music or sport?

Q629 [ScNotGo5] \*  
CARD G7 AGAIN  
(how acceptable do you think it is to not send a child to the nearest state school because...)  
The child has special educational needs?

Q630 [ScNotGo6] \*  
CARD G7 AGAIN  
(how acceptable do you think it is to not send a child to the nearest state school because...)  
The child's parents are very keen for the child to learn a specific academic subject that is not available at the nearest state school?

\* [ScNotGo1] TO [ScNotGo6]

- 1 Always acceptable
- 2 Usually acceptable
- 3 Sometimes acceptable
- 4 Rarely acceptable
- 5 Never acceptable
- 8 (Don't know)
- 9 (Refusal)

Q631 [GovAlloc]  
CARD G8  
Looking at this card, what role, if any, do you think the government should have in the allocation of secondary school places ...READ OUT...  
1 The government should not have any role - it should be up to individual parents and schools to determine which secondary schools children attend  
2 The government should make certain actions which parents might undertake to secure places at particular secondary schools illegal (such as deliberately providing inaccurate information about their main address) but should play no further role  
3 The government should create detailed policies and monitor the allocation of secondary school places to ensure that a good social mix of children is achieved in all schools  
8 (Don't know)  
9 (Refusal)

Q632- [PrivAtFW]

Q636 CARD G9

Looking at this list, can you tell me whether you or any family members has ever attended a private fee-paying primary or secondary school in the United Kingdom?

CODE ALL THAT APPLY.

`PRIVATE' PRIMARY OR SECONDARY SCHOOLS INCLUDE:

\* INDEPENDENT SCHOOLS

\* SCHOLARSHIPS AND ASSISTED PLACES AT FEE-PAYING SCHOOLS

THEY EXCLUDE:

\* DIRECT GRANT SCHOOLS (UNLESS FEE-PAYING)

\* VOLUNTARY-AIDED SCHOOLS

\* GRANT-MAINTAINED (`OPTED OUT') SCHOOLS

\* NURSERY SCHOOLS

Multicoded (Maximum of 5 codes)

- |   |                                                |            |
|---|------------------------------------------------|------------|
| 1 | Myself                                         | [AtPrvRsp] |
| 2 | My father or mother                            | [AtPrvPar] |
| 3 | A brother or sister                            | [AtPrvSib] |
| 4 | My child or children (including step children) | [AtPrvChd] |
| 5 | None of these                                  | [AtPrvNon] |
| 8 | (Don't know)                                   |            |
| 9 | (Refusal)                                      |            |

Q642- [SelAtFW]

Q646 CARD G9 AGAIN

Can you tell me whether you or any family members has ever attended a selective state school such as a grammar school (or a senior secondary school in Scotland)?

NOTE TO INTERVIEWERS: a selective school is a state school where you have to pass a test but not pay to get in.

NOTE TO INTERVIEWERS: If queried, secondary modern schools do not count as selective schools.

Multicoded (Maximum of 5 codes)

- |   |                      |            |
|---|----------------------|------------|
| 1 | Myself               | [AtSelRsp] |
| 2 | My father or mother  | [AtSelPar] |
| 3 | A brother or sister  | [AtSelSib] |
| 4 | My child or children | [AtSelChd] |
| 5 | None of these        | [AtSelNon] |
| 8 | (Don't know)         |            |
| 9 | (Refusal)            |            |

## Higher Education (version C)

### VERSION C: ASK ALL

Q653 [BTime]<sup>63</sup> \$ (NOT ON SCREEN)

Start time of BHeducn block

Range: 0 ... 1440

Q654 [OwnCh]

Computed : Number in HH grid with Rel3=Child and Age = 5-16

Range: 0 ... 97

98 (Can't calculate)

Q655 [HEdOpp]

CARD H1

Do you feel that opportunities for young people in Britain to go on to **higher education** - to a university or college - should be increased or reduced, or are they at about the right level now?

IF INCREASED OR REDUCED: a lot or a little?

1 Increased a lot

2 Increased a little

3 About right

4 Reduced a little

5 Reduced a lot

8 (Don't know)

9 (Refusal)

### IF R HAS CHILD(REN) OF SCHOOL AGE LIVING IN HH (>1 AT [OwnCh])

Q656 [ChLikUn2]

CARD H2

Taking your answers from this card, how likely do you think it is that any of your children who are still at school will go to university?

1 Very likely

2 Fairly likely

3 Not very likely

4 Not at all likely

5 (No child(ren) at school)

8 (Don't know)

9 (Refusal)

### VERSION C: ASK ALL

Q657 [HEFee]

CARD H3

I'm now going to ask you what you think about university or college students or their families paying towards the costs of their tuition, either while they are studying or after they have finished. Which of the views on this card comes closest to what you think about that?

1 **All** students or their families should pay towards the costs of their tuition

2 **Some** students or their families should pay towards the costs of their tuition, depending on their circumstances

3 **No** students or their families should pay towards the costs of their tuition

8 (Don't know)

9 (Refusal)

### IF 'All...' OR 'Some...' AT [HEFee]

---

<sup>63</sup> Computed from system clock the first time the Higher Education block is encountered

Q658 [HEFeeWhn]  
 And **when** should students or their families start paying towards the costs of their tuition...READ OUT...  
 1 ...while they are studying,  
 2 or, after they have finished studying and have got a job?  
 3 (Depends)  
 8 (Don't know)  
 9 (Refusal)

**VERSION C: ASK ALL**

Q659 [FeesUni]  
 Which of the following statements comes closest to your own view ...  
 READ OUT...  
 1 ...tuition fees for **all universities and colleges** should be the same,  
 2 or, tuition fees should be different depending on the university or college students go to?  
 8 (Don't know)  
 9 (Refusal)

Q660 [FeesSub]  
 And which of these two statements comes closest to your own view ...  
 READ OUT...  
 1 ...tuition fees for **all subjects studied** should be the same,  
 2 or, tuition fees should be different depending on the subject students study at university or college?  
 8 (Don't know)  
 9 (Refusal)

Q661 [HEGrant2]  
 And, at present, some full-time British university students get grants to help cover their **living** costs. Getting a grant depends upon the student's circumstances and those of their family. Do you think that ...  
 READ OUT ...  
 1 ...**all** students should get grants to help cover their living costs,  
 2 **some** students should get grants to help cover their living costs,  
 3 or, that no grants should be given to help cover students' living costs?  
 4 (It depends)  
 8 (Don't know)  
 9 (Refusal)

Q662 [HELoan]  
 Many full-time university students are now taking out government loans to help cover their living costs. They have to start repaying these loans when they begin working. Generally speaking, do you think that ...  
 READ OUT ...  
 1 ...students **should** be expected to take out loans to help cover their living costs,  
 2 or, students **should not** be expected to take out loans to help cover living costs?  
 3 (It depends)  
 8 (Don't know)  
 9 (Refusal)

Q663 [HEProp]  
 CARD H4  
 Out of every 100 young people in Britain, how many do you think should go on to higher education - to a university or college?  
 INTERVIEWER: IF ASKED: Include colleges of higher education but exclude further education colleges and sixth form colleges  
 1 No young people should go on to higher education  
 2 Between 1% and 10%

3 Between 11% and 20%  
4 Between 21% and 30%  
5 Between 31% and 40%  
6 Between 41% and 50%  
7 Between 51% and 60%  
8 Between 61% and 70%  
9 Between 71% and 80%  
10 Between 81% and 90%  
11 Between 91% and 100%  
12 All young people should go on to higher education  
13 SPONTANEOUS: All young people who want to go on to higher education  
should be able to  
98 (Don't know)  
99 (Refusal)

Q664 [HEPSpend]  
CARD H5  
Do you think the government spends too much money, too little money, or  
about the right amount on higher education?  
1 Much too little  
2 Too little  
3 About the right amount  
4 Too much  
5 Much to much  
8 (Don't know)  
9 (Refusal)

Q665 [Himp]  
CARD H6  
And how important do you think it is for a young person to go on to  
higher education - to a university or college?  
INTERVIEWER: IF ASKED: Include colleges of higher education but exclude  
further education colleges and sixth form colleges  
1 Very important  
2 Fairly important  
3 Not very important  
4 Not at all important  
5 SPONTANEOUS: It depends on the young person  
6 SPONTANEOUS: It depends on the career that the young person wants  
7 SPONTANEOUS: It depends how the young person will fund their higher  
education  
8 SPONTANEOUS: It depends what the young person's motivations are  
98 (Don't know)  
99 (Refusal)

Q666 [HEFtPt]  
CARD H7  
In general, do you think that young people studying for higher education  
qualifications at universities and colleges should study full-time for  
three or four years or do you think they should study part-time while  
working, taking longer to complete  
their courses?  
1 They should study full-time for three or four years  
2 They should study part-time while working, taking longer to complete  
their courses  
3 SPONTANEOUS: They should be able to choose which way to study  
8 (Don't know)  
9 (Refusal)

Q667 [HEUGo]  
Did you ever, or do you now, go to a university or polytechnic?

|   |              |
|---|--------------|
| 1 | Yes          |
| 2 | No           |
| 8 | (Don't know) |
| 9 | (Refusal)    |

## Respondent's job details

### ASK ALL

Q669 [BTime] <sup>64</sup> \$ (NOT ON SCREEN)

Start time of EmpB block

Range: 0 ... 1440

Q670 [EconAct] <sup>65</sup> (NOT ON SCREEN)

Economic activity in last week< Priority coded>

- 1 In full-time education (not paid for by employer, including on vacation)
- 2 On government training/employment programme
- 3 In paid work (or away temporarily) for at least 10 hours in week
- 4 Waiting to take up paid work already accepted
- 5 Unemployed and registered at a JobCentre or JobCentre Plus
- 6 Unemployed, @Unot@U registered, but actively looking for a job (of at least 10 hrs a week)
- 7 Unemployed, wanting a job (of at least 10 hrs per week) but @Unot@U actively looking for a job
- 8 Permanently sick or disabled
- 9 Wholly retired from work
- 10 Looking after the home
- 11 (Doing something else) (WRITE IN)
- 98 (Don't know)
- 99 (Refusal)

**ASK ALL THOSE WHO ARE NOT WORKING OR WAITING TO TAKE UP WORK (I.E. 'in full-time education', 'on government training scheme', 'unemployed', 'permanently sick or disabled', 'wholly retired from work', 'looking after the home' OR 'doing something else' AT [REconAc2])**

Q671 [LastJob] <sup>66</sup> (NOT ON SCREEN)

How long ago did you last have a paid job of at least 10 hours a week?  
GOVERNMENT PROGRAMMES/SCHEMES DO NOT COUNT AS 'PAID JOBS'.

- 1 Within past 12 months
- 2 Over 1, up to 5 years ago
- 3 Over 5, up to 10 years ago
- 4 Over 10, up to 20 years ago
- 5 Over 20 years ago
- 6 Never had a paid job of 10+ hours a week
- 8 (Don't know)
- 9 (Refusal)

**ASK ALL WHO HAVE EVER HAD A JOB ('paid work' OR 'waiting to take up a job' AT [EconAct] OR NOT 'never had a paid job' AT [LastJob])**

Q672 [Title] \$ <sup>67</sup>

Now I want to ask you about your (*present/last/future*) job.

**PRESENT JOB:** What is your job?

**PAST JOB:** What was your job?

**FUTURE JOB:** What will that job be?

PROBE IF NECESSARY: What (*is/was*) the name or title of the job?

Open Question (Maximum of 80 characters)

---

64 Computed from system clock the first time the Job Details block is encountered for respondent

65 Called [REconAct] on SPSS file. Derived from [REconAc2] in household grid section of the questionnaire. See also derived variable [REconSum].

66 Called [RLastJob] on SPSS file. Derived from [RLastJb2] in household grid section of the questionnaire.

67 See coded variable [RSOC2000] and derived variables [RNSSEC], [RClass] and [RClassGp].

Q673 [Typewk] \$  
 What kind of work (*do/did/will*) you do most of the time?  
 IF RELEVANT: What materials/machinery (*do/did/will*) you use?  
 Open Question (Maximum of 80 characters)

Q674 [Train] \$  
 What training or qualifications (*are/were*) needed for that job?  
 Open Question (Maximum of 80 characters)

Q675 [EmployA] <sup>68</sup>  
 In your (main) job (*are you/ were you/ will you be*) ... READ OUT  
 ...  
 1 ... an employee,  
 2 or self-employed?  
 8 (Don't know)  
 9 (Refusal)

Q676 [EmployB] <sup>69</sup> **(NOT ON SCREEN)**  
 Respondent currently employee or self-employed dv  
 1 Employee  
 2 self-employed  
 8 (Don't know)  
 9 (Refusal)

Q677 [Superv] <sup>70</sup>  
 In your job, (*do/did/will*) you have any formal responsibility for  
 supervising the work of other (*employees/people*)?  
 DO NOT INCLUDE PEOPLE WHO ONLY SUPERVISE:  
 - CHILDREN, E.G. TEACHERS, NANNIES, CHILDMINDERS  
 - ANIMALS  
 - SECURITY OR BUILDINGS, E.G. CARETAKERS, SECURITY GUARDS  
 1 Yes  
 2 No  
 8 (Don't know)  
 9 (Refusal)

**IF 'yes' AT [Superv]**

Q678 [RMany]  
 How many?  
 Range: 1 ... 9997  
 9998 (Don't know)  
 9999 (Refusal)

**ASK ALL WHO HAVE EVER HAD A JOB ('paid work' OR 'waiting to take up a  
 job' AT [EconAct] OR NOT 'never had a paid job' AT [LastJob])**

Q679 [RSuper] <sup>71</sup> **(NOT ON SCREEN)**  
 How many employees do you supervise? dv  
 Range: 1 ... 9999

**ASK ALL EMPLOYEES IN CURRENT/LAST JOB ('employee' OR DON'T KNOW AT  
 [EmployA])**

Q680 [OcSect2] <sup>72</sup>  
 CARD J1

---

68 Called [REmployee] on SPSS file. See also derived variable [REmployee].

69 Called [REmployee] on SPSS file. Derived from [EmployA].

70 Called [RSuperv] on the SPSS file.

71 Derived from [RSuperv] and [RMany].

72 Called [ROcSect2] on SPSS file.

Which of the types of organisation on this card (*do you work/did you work/will you be working*) for?

- 1 PRIVATE SECTOR FIRM OR COMPANY Including, for example, limited companies and PLCs
- 2 NATIONALISED INDUSTRY OR PUBLIC CORPORATION Including, for example, the Post Office and the BBC
- 3 OTHER PUBLIC SECTOR EMPLOYER  
Incl eg: - Central govt/ Civil Service/ Govt Agency  
- Local authority/ Local Educ Auth (INCL 'OPTED OUT' SCHOOLS)  
- Universities  
- Health Authority / NHS hospitals / NHS Trusts/ GP surgeries  
- Police / Armed forces
- 4 CHARITY/ VOLUNTARY SECTOR Including, for example, charitable companies, churches, trade unions
- 7 Other answer (WRITE IN)
- 8 EDIT ONLY: Self-employed
- 9 EDIT ONLY: Owns business / company
- 98 (Don't know)
- 99 (Refusal)

**IF 'Other answer' AT [OcSect2]**

- Q681 [othspec] \$  
WRITE IN OTHER ANSWER GIVEN  
Open Question (Maximum of 120 characters)

**ASK ALL WHO HAVE EVER HAD A JOB ('paid work' OR 'waiting to take up a job' AT [EconAct] OR NOT 'never had a paid job' AT [LastJob])**

- Q683 [EmpMake] \$ <sup>73</sup>  
**IF EMPLOYEE:**What (*does/did*) your employer make or do at the place where you (*will*) usually work(ed) from?  
**IF SELF-EMPLOYED:** What (*do/did/will*) you make or do at the place where you (*will*) usually work(ed) from?  
Open Question (Maximum of 80 characters)

**ASK ALL EMPLOYEES IN CURRENT/LAST JOB ('employee' OR DON'T KNOW AT [EmployA])**

- Q684 [REmpWkFW] \$ <sup>74</sup>  
Including yourself, how many people (*are/were*) employed at the place where you usually (*work/worked/will work*) (from)?  
PROBE FOR CORRECT PRECODE.
- 1 Under 10
- 2 10-24
- 3 25-49
- 4 50-99
- 5 100-199
- 6 200-499
- 7 500+
- 8 (Don't know)
- 9 (Refusal)

**ASK ALL SELF-EMPLOYED IN CURRENT/LAST JOB ('self-employed' AT [EmployA])**

- Q685 [SEmpNum] <sup>75</sup>  
In your work or business, (*do/did/will*) you have any employees, or not?  
IF YES: How many?  
IF 'NO EMPLOYEES', CODE 0.

---

73 See coded variables [RSIC2003] and [RSIC03Gp].

74 See derived variables [REmpWork] and [REmpWrk2].

75 See also derived variables [REmpWork], [REmpWrk2] and [SNumEmp].

FOR 500+ EMPLOYEES, CODE 500.

NOTE: FAMILY MEMBERS MAY BE EMPLOYEES ONLY IF THEY RECEIVE A REGULAR WAGE OR SALARY.

Range: 0 ... 500

998 (Don't know)

999 (Refusal)

**ASK ALL WHO HAVE EVER WORKED ('paid work' OR 'waiting to take up a job' AT [EconAct] OR NOT 'never had a paid job' AT [LastJob])**

Q686 [REmpWork] <sup>76</sup> **(NOT ON SCREEN)**

How many employees at R's work grouped [6 categories] dv

0 None

1 Under 10

2 10-24

3 25-99

4 100-499

5 500 or more

8 (Don't know)

9 (Refusal)

Q687 [REmpWrk2] <sup>77</sup> **(NOT ON SCREEN)**

How many employees at R's work grouped [8 categories] DV

1 Under 10

2 10-24

3 25-49

4 50-99

5 100-199

6 200-499

7 500+

8 (Don't know)

9 (Refusal)

**ASK ALL SELF-EMPLOYED IN CURRENT JOB ('self-employed' AT [EmployB])**

Q690 [SNumEmp]

Any employees if self-employed? dv

1 Yes

2 No

8 (Don't know)

9 (Refusal)

**ASK ALL IN PAID WORK (AT {EconAct})**

Q691 [WkJbTim]

In your present job, are you working ... READ OUT ...

RESPONDENT'S OWN DEFINITION

1 ... full-time,

2 or, part-time?

8 (Don't know)

9 (Refusal)

**ASK ALL EMPLOYEES IN CURRENT JOB ('employee' OR DON'T KNOW AT [EmployB])**

Q692 [ESrJbTim]

In present job, working full-time[if emp]. DV

1 Full-time,

2 Part-time?

8 (Don't know)

9 (Refusal)

---

76 Derived from [REmpWkFW] and [SEmpNum].

77 Derived from [REmpWkFW] and [SEmpNum].

**ASK ALL SELF EMPLOYED IN CURRENT, PAST OR FUTURE JOB ('self employed' AT [EmployA])**

Q693 [SSrJbTim]  
Are you full/part-time? [if selfemp] DV  
1 Full-time,  
2 Part-time?  
8 (Don't know)  
9 (Refusal)

**ASK ALL IN PAID WORK (AT {EconAct})**

Q694 [WkJbHrsI] <sup>78</sup>  
How many hours do you normally work a week in your main job -  
**including** any paid or unpaid overtime?  
ROUND TO NEAREST HOUR.  
IF RESPONDENT CANNOT ANSWER, ASK ABOUT LAST WEEK.  
IF RESPONDENT DOES NOT KNOW EXACTLY, ACCEPT AN ESTIMATE.  
FOR 95+ HOURS, CODE 95.  
FOR 'VARIES TOO MUCH TO SAY', CODE 96.  
Range: 10 ... 96  
98 (Don't know)  
99 (Refusal)

**ASK ALL EMPLOYEES IN CURRENT, PAST OR FUTURE JOB ('employee' OR DON'T KNOW AT [EmployA])**

Q695 [EJbHrsX]  
What are your **basic or contractual hours** each week in your main job -  
**excluding** any paid and unpaid overtime?  
ROUND TO NEAREST HOUR.  
IF RESPONDENT CANNOT ANSWER, ASK ABOUT LAST WEEK.  
IF RESPONDENT DOES NOT KNOW EXACTLY, ACCEPT AN ESTIMATE.  
FOR 95+ HOURS, CODE 95.  
FOR 'VARIES TOO MUCH TO SAY', CODE 96.  
Range: 0 ... 96  
98 (Don't know)  
99 (Refusal)

**ASK ALL CURRENT EMPLOYEES ('employee' OR DON'T KNOW AT [EmployB])**

Q696 [ExPrtFull] <sup>79</sup>  
(Is/Was/Will) the job (be) ... READ OUT ...  
1 ... full-time - that is, 30 or more hours per week,  
2 or, part-time?  
8 (Don't know)  
9 (Refusal)

**ASK ALL WHO HAVE EVER WORKED BUT ARE NOT CURRENTLY WORKING ('waiting to take up work' AT [EconAct] OR NOT 'never worked' AT [LastJob])**

Q697 [EJbHrCaI] <sup>80</sup> (NOT ON SCREEN)  
Hours R works per week, including overtime [employee]. DV  
0 less than 10 hours a week  
1 10-15 hours a week  
2 16-23 hours a week  
3 24-29 hours a week  
4 30 or more hours a week  
5 varies too much to say  
8 (Don't know)  
9 (Refusal)

---

78 See also derived variables [EJbHrCaI] and [SJbHrCAI].

79 See also derived variable [RPartFull].

80 Derived from [WkJbHrsI].

Q698 [EJbHrCaX] <sup>81</sup> **(NOT ON SCREEN)**  
 Hours R works per week, excluding overtime [employee]. DV  
 0 less than 10 hours a week  
 1 10-15 hours a week  
 2 16-23 hours a week  
 3 24-29 hours a week  
 4 30 or more hours a week  
 5 varies too much to say  
 8 (Don't know)  
 9 (Refusal)

**ASK ALL CURRENT SELF-EMPLOYED ('self-employed' AT [EmployB])**

Q699 [SJbHrCaI] <sup>82</sup> **(NOT ON SCREEN)**  
 Hours R works per week, including overtime [self-employed]. DV  
 0 less than 10 hours a week  
 1 10-15 hours a week  
 2 16-23 hours a week  
 3 24-29 hours a week  
 4 30 or more hours a week  
 5 varies too much to say  
 8 (Don't know)  
 9 (Refusal)

**ASK ALL WHO HAVE EVER WORKED ('paid work' OR 'waiting to take up a job' AT [EconAct] OR NOT 'never had a paid job' AT [LastJob])**

Q700 [RPartFull] <sup>83</sup> **(NOT ON SCREEN)**  
 R ever worked part time/full time? DV  
 1 Full-time (30+ hours)  
 2 Part-time (10-29 hours)?  
 8 (Don't know)  
 9 (Refusal)

**ASK ALL WHO HAVE EVER WORKED ('paid work' OR 'waiting to take up a job' AT [EconAct] OR NOT 'never had a paid job' AT [LastJob])**

Q702 [EconSum] <sup>84</sup> **(NOT ON SCREEN)**  
 Resp economic activity <summary> DV  
 1 In full-time education/training  
 2 In work, waiting to take up work  
 3 Unemployed  
 4 Retired  
 5 Other  
 8 (Don't know)  
 9 (Refusal)

Q703 [EconPos] <sup>85</sup> **(NOT ON SCREEN)**  
 Current economic position of resp  
 1 Employee (full-time)  
 2 Employee (part-time)  
 3 Self-employed (f-t)  
 4 Self-employed (p-t)  
 5 In work (status not known)  
 6 Waiting to take up work  
 7 Unemployed

---

81 Derived from [EJbHrsX].

82 Derived from [WkJbHrsI].

83 Derived from [WkJbTim] and [ExPrtFull].

84 Called [REconSum] on SPSS file. Derived from [EconAct].

85 Called [REconPos] on SPSS file. Derived from [EconAct], [EmployA] and [WkJbTim].

8 Looking after the home  
 9 Retired  
 10 In f-t education  
 11 Other  
 98 (Don't know)  
 99 (Refusal)

Q705 [EmpSta2]<sup>86</sup> **(NOT ON SCREEN)**  
 Respondent: R.G.employment status dv  
 1 Self-employed - 25+ employees  
 2 Self-employed - 1-24 employees  
 3 Self-employed - no employees  
 4 Self-employed - not known  
 5 Manager - 25+ employees  
 6 Manager - 1-24 employees  
 7 Manager - not known  
 8 Foreman/supervisor  
 9 Other employee  
 10 Employee - not known  
 11 Inadequately described/not stated

Q707 [RSIC07Gp]<sup>87</sup> **(NOT ON SCREEN)**  
 Standard Industrial Classification 2007 (section)  
 1 Agriculture, forestry and fishing  
 2 Mining and quarrying  
 3 Manufacturing  
 4 Electricity, gas, steam and air conditioning supply  
 5 Water supply, sewerage, waste management and remediation activities  
 6 Construction  
 7 Wholesale and retail trade; repair of motor vehicles and motor cycles  
 8 Transport and storage  
 9 Accommodation and food service activities  
 10 Information and communication  
 11 Financial and insurance activities  
 12 Real estate activities  
 13 Professional, scientific and technical activities  
 14 Administrative and support service activities  
 15 Public administration and defence; compulsory social security  
 16 Education  
 17 Human health and social work activities  
 18 Arts, entertainment and recreation  
 19 Other service activities  
 20 Activities of HHs as employers; undifferentiated goods and services  
 producing activities of HHs for own use  
 21 Activities of extraterritorial organisations and bodies  
 98 Not classifiable

Q708 [NSEG]<sup>88</sup> **(NOT ON SCREEN)**  
 Respondent's Socio-Economic Group [pre-SOC2000]best estimate dv  
 1 Employer - large organisation  
 2 Manager - large organisation  
 3 Employer - small organisation  
 4 Manager - small organisation  
 5 Professional worker - self-employed  
 6 Professional worker - employee  
 7 Intermediate non-manual - ancillary

---

86 Called [REmpSta2] on SPSS file. Derived from [EmployA], [ES2000] and [REmpWork].

87 Derived from [RSIC2007].

88 Called [RNSEG] on SPSS file. See also derived variable [RNSEGGp].

8 Intermediate non-manual - supervisor  
 9 Junior non-manual  
 10 Personal services  
 11 Foreman/supervisor - manual  
 12 Skilled manual  
 13 Semi-skilled manual  
 14 Unskilled manual  
 15 Own account worker (not professional)  
 16 Farmer - employer/manager  
 17 Farmer - own account  
 18 Agricultural worker  
 19 Member of armed forces  
 20 Inadequately described/not stated

Q709 [NSocCl] <sup>89</sup> **(NOT ON SCREEN)**  
 Respondent : social class[pre-SOC2000]best estimate dv  
 1 I (SC=1)  
 2 II (SC=2)  
 3 III (non-manual) (SC=3)  
 4 III (manual) (SC=4)  
 5 IV (SC=5)  
 6 V (SC=6)  
 7 Armed forces  
 8 Insufficient information

Q710 [OpCat] <sup>90</sup> **(NOT ON SCREEN)**  
 NS-SEC operational category [respondent] dv  
 1 Employers in large organisations  
 2 Higher managerial occupations  
 3 Higher professional occupations  
 4 Lower professional & higher technical occupa  
 5 Lower managerial occupations  
 6 Higher supervisory occupations  
 7 Intermediate occupations  
 8 Employers in small organisation  
 9 Own account workers  
 10 Lower supervisory occupations  
 11 Lower technical occupations  
 12 Semi-routine occupations  
 13 Routine occupations  
 16 Occup not stated or inadeq described  
 17 Not classifiable

Q711 [Class] <sup>91</sup> **(NOT ON SCREEN)**  
 R's occupational class [7 cat] dv  
 1 Employers in large org; higer manag & profess  
 2 Lower profess & manag; higher techn & superv  
 3 Intermediate occupations  
 4 Employers in small org; own account workers  
 5 Lower supervisory & technical occupations  
 6 Semi-routine occupations  
 7 Routine occupations  
 8 Not classified

---

89 Called [RNSocCL] on SPSS file.

90 Called [ROpCat] on SPSS file. Derived from [RNSSEC].

91 Called [RClass] on SPSS file. Derived Called [RSOC2000] on SPSS file.

91 Called [RES2000] on SPSS file.

91 Called [RNSSEC] on SPSS file.

91 Computed from [RNSSEC].

Q712 [ClassGp] <sup>92</sup> **(NOT ON SCREEN)**  
 NS-SEC analytic classes [respondent] <group> dv  
 1 Managerial & professional occupa  
 2 Intermediate occupations  
 3 Employers in small org; own account workers  
 4 Lower supervisory & technical occupations  
 5 Semi-routine & routine occupations  
 8 Not classifiable

Q713 [NSSECG] <sup>93</sup>  
 Respondent/Spouse NS-SEC Socio-economic Class (analytic class level) :dv  
 1.1 Large employers and higher managerial occupations  
 1.2 Higher professional occupations  
 2 Lower managerial and professional occupations  
 3 Intermediate occupations  
 4 Small employers and own account workers  
 5 Lower supervisory & technical occupations  
 6 Semi-routine Occupations  
 7 Routine occupations  
 8 Not classified

Q714 [ISCO] <sup>94</sup> \$ **(NOT ON SCREEN)**  
 Respondent ISCO dv  
 Range: 0 ... 999

**ASK ALL**

Q717 [UnionSA]  
 (May I just check) are you **now** a member of a trade union or staff  
 association?  
 PROBE AS NECESSARY AND CODE FIRST TO APPLY  
 1 Yes, trade union  
 2 Yes, staff association  
 3 No  
 8 (Don't know)  
 9 (Refusal)

**IF 'No' or 'Don't know' AT [UnionSA]**

Q718 [TUSAEver]  
 Have you **ever** been a member of a trade union or staff association?  
 PROBE AS NECESSARY AND CODE FIRST TO APPLY  
 1 Yes, trade union  
 2 Yes, staff association  
 3 No  
 8 (Don't know)  
 9 (Refusal)

**ASK ALL THOSE WHO ARE NOT WORKING (I.E. 'in full-time education', 'on government training scheme', 'waiting to take up work, 'unemployed', 'permanently sick or disabled', 'wholly retired from work', 'looking after the home' OR 'doing something else' AT [REconAc2])**

Q719 [NPWork10]  
 In the seven days ending last Sunday, did you have any paid work of less  
 than 10 hours a week?  
 1 Yes  
 2 No  
 8 (Don't know)  
 9 (Refusal)

---

92 Called [RClassGp] on SPSS file. Derived from [RNSSEC].

93 Called [RNSSECG] on SPSS file. Derived from [RNSSEC].

94 Called [RISCO] on SPSS file. Derived from [RSOC2000].

Q720 [XSOC2000] <sup>95</sup> \$ **(NOT ON SCREEN)**  
Standard Occupational Classification - SOC2000 - WITHOUT DOTS.  
Range: 0 ... 9999

Q721 [IndexNo] \$ **(NOT ON SCREEN)**  
Index number of SOC2000 entry selected in coding index  
Range: 0 ... 999999  
9999998 (Don't know)  
9999999 (Refusal)

Q722 [ES2000] <sup>96</sup> **(NOT ON SCREEN)**  
Full employment status - derived from Job block questions and SOC2000

|    |                                                                |
|----|----------------------------------------------------------------|
| 1  | Self-employed : large establishment (25+ employees)            |
| 2  | Self-employed : small establishment (1-24 employees)           |
| 3  | Self-employed : no employees                                   |
| 4  | Manager : large establishment (25+ employees)                  |
| 5  | Manager : small establishment (1-24 employees)                 |
| 6  | Foreman or supervisor                                          |
| 7  | Employee (not elsewhere classified)                            |
| 8  | No employment status info given - for use in this program only |
| 98 | (Don't know)                                                   |
| 99 | (Refusal)                                                      |

Q723 [NSSEC] <sup>97</sup> \$ **(NOT ON SCREEN)**  
NS-SEC Socio-economic Class (full classification)- derived variable

|      |                                                   |
|------|---------------------------------------------------|
| 1    | Employers in large organisations                  |
| 2    | Higher managerial occupation                      |
| 3.1  | Higher prof: traditional employees                |
| 3.2  | Higher prof: new employees                        |
| 3.3  | Higher prof: traditional self-employed            |
| 3.4  | Higher prof: new'self-employed                    |
| 4.4  | Lower prof&higher tech: new self-employed         |
| 4.1  | Lower prof&higher tech: traditional employees     |
| 4.3  | Lower prof&higher tech: traditional self-employed |
| 4.2  | Lower prof&higher tech: new employees             |
| 5    | Lower managerial occupations                      |
| 6    | Higher supervisory occupations                    |
| 7.1  | Intermed: clerical and administrative             |
| 7.2  | Intermed: sales and services                      |
| 7.3  | Intermed: technical and auxiliary                 |
| 7.4  | Intermed: engineering                             |
| 8.2  | Small employers: agriculture                      |
| 8.1  | Small employers: non-professional                 |
| 9.2  | Own account workers: agriculture                  |
| 9.1  | Own account workers: non-professional             |
| 10   | Lower supervisory occupations                     |
| 11.2 | Lower techn: process operative                    |
| 11.1 | Lower techn: craft                                |
| 12.1 | Semi-routine: sales                               |
| 12.2 | Semi-routine: service                             |
| 12.3 | Semi-routine: technical                           |
| 12.4 | Semi-routine: operative                           |

---

<sup>95</sup> See derived variable RSOC2ksm

<sup>96</sup> Called [RES2000] on SPSS file.

<sup>97</sup> See derived variable [RNSSECG].

12.5 Semi-routine: agriculture  
 13.1 Routine: sales and service  
 12.7 Semi-routine: childcare  
 13.2 Routine: production  
 13.3 Routine: technical  
 13.4 Routine: operative  
 12.6 Semi-routine: clerical  
 13.5 Routine: agriculture  
 14.1 Never worked  
 14.2 Long-term unemployed  
 15 Full-time students  
 16 Not stated or inadeq described  
 17 Not classifiable for other reason

Q724 [SECFlag] \$ **(NOT ON SCREEN)**  
 Indicator for status of SEC  
 0 - valid combination of SEC and ES2000 1 - invalid combination 2 - no  
 employment status info - simplified SEC used  
 Range: 0 ... 2  
 8 (Don't know)  
 9 (Refusal)

Q725 [SEG] \$ **(NOT ON SCREEN)**  
 Socio-economic Group (old scheme)  
 Range: 0 ... 16  
 9998 (Don't know)  
 9999 (Refusal)

Q726 [SC] \$ **(NOT ON SCREEN)**  
 Social Class (old scheme)  
 Range: 0 ... 6  
 998 (Don't know)  
 999 (Refusal)

Q727 [SIC2007] <sup>98</sup> \$ **(NOT ON SCREEN)**  
 EDITOR: Review industry details and assign 2-digit **SIC2007** code for:  
 [EmPMake]  
 Range: 1 ... 99

---

<sup>98</sup> See derived variable [RSIC07Gp]

# Employment

## *Employment Relations*

### ASK ALL

Q729 [BTime] <sup>99</sup> \$ (NOT ON SCREEN)

Start time of BEmploy block

Range: 0 ... 1440

9998 (Don't know)

9999 (Refusal)

### ASK IF 'Employee' OR 'Don't know' AT [EmployB]

Q730 [JobSat3] \*

CARD K1

All in all, how satisfied are you with your main job?

Q731 [PaySatis] \*

CARD K1 AGAIN

How satisfied are you with your pay, including any overtime, bonuses or tips?

Q732 [HrsSatis]

CARD K1 AGAIN

How satisfied are you with the number of hours you usually work each week?

\* [JobSat3] TO [HrsSatis]

1 Very satisfied

2 Satisfied

3 Neither satisfied nor dissatisfied

4 Dissatisfied

5 Very dissatisfied

8 (Don't know)

9 (Refusal)

Q733- [PayCFW]

Q741 CARD K2

When thinking about how satisfied you are with your pay, do you tend to compare yourself with any of the following groups? (If so, please say which.)

CODE ALL THAT APPLY

PROMPT: Which others?

Multicoded (Maximum of 9 codes)

1 Neighbours [PayC1]

2 Friends [PayC2]

3 People in the same workplace as you [PayC3]

4 People who are the same age as you [PayC4]

5 People who are the same sex as you [PayC5]

6 People in the same profession as you [PayC6]

7 People with the same qualifications as you [PayC7]

8 Other answer(WRITE IN) [PayC8]

9 I do not compare my own pay with anyone else's [PayC9]

98 (Don't know)

99 (Refusal)

---

99 Computed from system clock the first time the Employment Relations block is encountered

**IF 'Other answer' IN [PayCFW]**  
 Q742 [othspec] \$  
 WRITE IN OTHER ANSWER GIVEN  
 Open Question (Maximum of 120 characters)

**ASK IF >1 ANSWER GIVEN AT [PayCFW]**  
 Q752 [PayCMain]  
 CARD K2 AGAIN  
 Which of these groups is the most important one for comparing your pay with?  
 1 Neighbours  
 2 Friends  
 3 People in the same workplace as you  
 4 People who are the same age as you  
 5 People who are the same sex as you  
 6 People in the same profession as you  
 7 People with the same qualifications as you  
 8 Other answer(WRITE IN)  
 98 (Don't know)  
 99 (Refusal)

**IF 'Other answer' AT [PayCMain]**  
 Q753 [othspec] \$  
 WRITE IN OTHER ANSWER GIVEN  
 Open Question (Maximum of 120 characters)

**ASK IF 'Employee' OR 'Don't know' AT [EmployB]**  
 Q755 [EmplayFW1] <sup>100</sup>  
 For how long have you been continuously employed by your present employer?  
 ENTER NUMBER. THEN SPECIFY MONTHS OR YEARS  
 Range: 1 ... 60  
 98 (Don't know)  
 99 (Refusal)

**IF >0 AND <=60 AT [EmplayFW1]**  
 Q756 [EmplayFW2] \$ <sup>101</sup>  
 SPECIFY WHETHER TIME WITH PRESENT EMPLOYER GIVEN AS MONTHS OR YEARS  
 1 Months  
 2 Years

**ASK IF 'Employee' OR 'Don't know' AT [EmployB]**  
 Q757 [EmploydT] <sup>102</sup>  
 Time with present employer (months) dv  
 Range: 1 ... 997  
 998 (Don't know)  
 999 (Refusal)

**ASK IF 'Employee' OR 'Don't know' AT [EmployB]**  
 Q758 [NumEmp]  
 Over the coming year do you expect your workplace to be ...READ OUT...  
 1 ... increasing its number of employees,  
 2 reducing its number of employees,  
 3 or, will the number of employees stay about the same?  
 7 Other answer(WRITE IN)  
 8 (Don't know)

---

<sup>100</sup> See derived variable [EmploydT]

<sup>101</sup> See derived variable [EmploydT]

<sup>102</sup> Derived from [EmplayFW1] and [EmplayFW2]

9 (Refusal)

**IF 'Other answer' AT [NumEmp]**

Q759 [othspec] \$  
 WRITE IN OTHER ANSWER GIVEN  
 Open Question (Maximum of 120 characters)

**ASK IF 'Employee' OR 'Don't know' AT [EmployB]**

Q761 [Leavejob]  
 Thinking now about your own job.  
 How likely or unlikely is it that you will leave this employer over the  
 next year for any reason?  
 Is it ...READ OUT...

1 ... very likely,  
 2 quite likely,  
 3 not very likely,  
 4 or, not at all likely?  
 8 (Don't know)  
 9 (Refusal)

**IF 'very likely' OR 'quite likely' AT [LeaveJob]**

Q762- [WhyGoFW] <sup>103</sup>  
 Q770 CARD K3  
 Why do you think you will leave? Please choose a phrase from this card  
 or tell me what other reason there is.  
 PROBE: Which others?  
 CODE ALL THAT APPLY  
 Multicoded (Maximum of 9 codes)

|    |                                                              |           |
|----|--------------------------------------------------------------|-----------|
| 1  | Firm will close down                                         | [WHYGo1]  |
| 2  | I will be declared redundant                                 | [WHYGo2]  |
| 3  | I will reach normal retirement age                           | [WHYGo3]  |
| 4  | My contract of employment will expire                        | [WHYGo4]  |
| 5  | I will take early retirement                                 | [WHYGo5]  |
| 6  | I will decide to leave and work for another employer         | [WHYGo6]  |
| 7  | I will decide to leave and work for myself, as self-employed | [WHYGo7]  |
| 10 | I will leave to look after home/children/relative            | [WHYGo10] |
| 11 | RETURN TO EDUCATION                                          | [WHYGo11] |
| 97 | Other answer(WRITE IN)                                       | [WHYGo8]  |
| 98 | (Don't know)                                                 |           |
| 99 | (Refusal)                                                    |           |

**IF 'Other answer' IN [WhyGoFW]**

Q771 [OthSpec] \$  
 WRITE IN OTHER ANSWER GIVEN  
 Open Question (Maximum of 120 characters)

**ASK IF 'Employee' OR 'Don't know' AT [EmployB]**

Q783 [WpUnion3]  
 At your place of work are there any unions or staff associations?  
 IF ASKED: A union or staff association is any independent organisation  
 that represents the interests of people at work.  
 IF YES, PROBE FOR UNION OR STAFF ASSOCIATION. CODE FIRST TO APPLY.

1 Yes : trade union(s)  
 2 Yes : staff association  
 3 No, none  
 8 (Don't know)  
 9 (Refusal)

Q784 [UnionRec]

<sup>103</sup> See also derived variables [WhyGo1] to [WhyGo11] and [WhyGo8]

Does management recognise *(these unions/this staff association)*  
for the purposes of negotiating pay and conditions of employment?

- 1 Yes
- 2 No
- 8 (Don't know)
- 9 (Refusal)

Q785 [WPUnioW3]

On the whole, do you think *(these unions do their/this staff association does its)* job well or not?

- 1 Yes
- 2 No
- 8 (Don't know)
- 9 (Refusal)

Q786 [TUElig]

Are people doing your job eligible to join a union or staff association at your workplace?

IF ASKED: A union or staff association is any independent organisation that represents the interests of people at work.

IF YES, PROBE FOR UNION OR STAFF ASSOCIATION. CODE FIRST TO APPLY.

- 1 Yes : trade union(s)
- 2 Yes : staff association
- 3 No
- 8 (Don't know)
- 9 (Refusal)

**ASK ALL**

Q787 [TUMstImp]

CARD K4

Listed on this card are a number of things that trade unions or staff associations can do. Which, if any, do you think should be the **most important** thing they should try to do?

- 1 Reduce pay differences in the workplace
- 2 Promote equality for women or for ethnic and other minority groups
- 3 Represent individual employees in dealing with their employer about problems at work
- 4 Protect existing employees' jobs
- 5 Improve working conditions across the workplace
- 6 Improve pay for all employees
- 7 Have an input into the running of the business
- 97 (None of these)
- 98 (Don't know)
- 99 (Refusal)

**ASK IF 'Employee' OR 'Don't know' AT [EmployB]**

Q788 [IndRel]

In general how would you describe relations between management and other employees at your workplace ... READ OUT ...

- 1 ... very good,
- 2 quite good,
- 3 not very good,
- 4 or, not at all good?
- 8 (Don't know)
- 9 (Refusal)

Q789 [WorkRun]

And in general, would you say your workplace was ... READ OUT ...

- 1 ... very well managed,
- 2 quite well managed,
- 3 or, not well managed?

8 (Don't know)  
9 (Refusal)

Q790 [SayJob]  
Suppose there was going to be some decision made at your place of work that changed the way you do your job. Do you think that **you personally** would have any say in the decision about the change, or not?  
IF `DEPENDS': Code as `Don't know' <CTRL+K+Enter>

1 Yes  
2 No  
8 (Don't know)  
9 (Refusal)

**IF 'Yes' AT [SayJob]**

Q791 [MuchSay]  
How much say or chance to influence the decision do you think you would have ... READ OUT ...

1 ...a great deal,  
2 quite a lot,  
3 or, just a little?  
8 (Don't know)  
9 (Refusal)

**ASK IF 'Employee' OR 'Don't know' AT [EmployB]**

Q792 [MoreSay]  
Do you think you should have **more** say in decisions affecting your work, or are you satisfied with the way things are?

1 Should have more say  
2 Satisfied with way things are  
8 (Don't know)  
9 (Refusal)

Q793 [PrefHr2]  
Thinking about the number of hours you work including regular overtime, would you prefer a job where you worked ... READ OUT ...

1 ...more hours per week,  
2 fewer hours per week,  
3 or, are you happy with the number of hours you work at present?  
8 (Don't know)  
9 (Refusal)

**IF 'fewer hours per week' AT [PrefHr2]**

Q794 [EarnHr2]  
Would you still prefer to work fewer hours, if it meant earning less money as a result?

1 Yes  
2 No  
3 It depends  
8 (Don't know)  
9 (Refusal)

**ASK IF 'Employee', 'Self-employed' OR 'Don't know' AT [EmployB]**

Q795 [WkWorkHd]  
CARD K5  
Which of these statements best describes your feelings about your job?  
In my job :

1 I only work as hard as I have to  
2 I work hard, but not so that it interferes with the rest of my life  
3 I make a point of doing the best I can, even if it sometimes does interfere with the rest of my life  
8 (Don't know)

9 (Refusal)

**ASK IF 'Employee' OR 'Don't know' AT [EmployB]**

Q796 [Replaced] \*  
CARD K6

In your opinion, how difficult or easy would it be for your employer to replace you if you left?  
(Please use this card)

Q797 [EasyJob] \*  
CARD K6 AGAIN

And how difficult or easy would it be for you to get a similar or better job with another employer if you wanted?

\* [Replaced] AND [EasyJob]

- 1 Very difficult
- 2 Difficult
- 3 Neither difficult nor easy
- 4 Easy
- 5 Very easy
- 8 (Don't know)
- 9 (Refusal)

Q798 [SecurEmp]  
CARD K7

How secure do you feel your employment is with your present employer?

- 1 Very secure
- 2 Secure
- 3 Neither secure nor insecure
- 4 Insecure
- 5 Very insecure
- 8 (Don't know)
- 9 (Refusal)

Q799 [ReducEm]

Has there been a reduction in the number of employees at your workplace in the last 12 months?

- 1 Yes
- 2 No
- 8 (Don't know)
- 9 (Refusal)

Q800 [Sacked]

Has any employee been dismissed, or made redundant, at your workplace in the last 12 months?

IF YES: (Was the employee / Were the employees) dismissed or made redundant?

- 1 Yes - dismissed
- 2 Yes - made redundant
- 3 Yes - both
- 4 Yes - not sure whether dismissed or made redundant
- 5 No
- 8 (Don't know)
- 9 (Refusal)

Q801 [ConfExp]  
CARD K8

Employees sometimes experience problems in relation to their rights at work. These might include problems with being paid the right amount, with their holiday entitlement or hours of work, or being treated unfairly or unlawfully by management or co-

workers.

Over the past five years, have you personally experienced any problems in relation to your rights at work?

- 1 Yes, once
- 2 Yes, more than once
- 3 No
- 8 (Don't know)
- 9 (Refusal)

Q802 [ManSkill] \*  
CARD K9

Thinking now about the management at your workplace. To what extent do you agree or disagree with the following statement...

Management at my workplace have the skills to deal fairly with workplace problems **when they arise**.

Q803 [COwnPref] \*  
CARD K9 AGAIN

Different people have different preferred approaches when they experience problems with their rights at work. How much do you agree or disagree with each of the following statements about responding to such problems?

I would prefer to deal with workplace problems informally when they arise rather than follow formal rules and procedures.

Q804 [CManPref] \*

CARD K9 AGAIN (And how much do you agree or disagree...)

Management at my workplace would prefer to deal with workplace problems informally when they arise, rather than follow formal rules and procedures.

\* [ManSkill] TO [CManPref]

- 1 Agree strongly
- 2 Agree
- 3 Neither agree nor disagree
- 4 Disagree
- 5 Disagree strongly
- 8 (Don't know)
- 9 (Refusal)

**ASK IF RESPONDENT NOT RETIRED (AT [REconAct]): if AGED <65**

Q805 [RetStan2]  
CARD K10

How much do you agree or disagree with each of these statements.

I worry a lot about the standard of living I will have when I reach retirement age?

- 1 Agree strongly
- 2 Agree
- 3 Neither agree nor disagree
- 4 Disagree
- 5 Disagree strongly
- 8 (Don't know)
- 9 (Refusal)

**ASK THOSE CURRENTLY IN WORK AND 'Employee' OR 'Don't know' AT [EmployB]**

Q806 [RetExp]

At the moment when do you expect to retire from your main job? In your ...READ OUT...

- 1 ...40s,
- 2 50s,
- 3 60s,

4 70s,  
5 80s,  
6 or, at some other time?  
7 (Not planning to retire)  
8 (No main job)  
98 (Don't know)  
99 (Refusal)

**IF AGED 35 OR OVER OR IF UNDER 35 BUT ANSWERED '60s' OR 'at some other time' AT [RetExp]**

Q807 [RetExpb]  
And specifically, at what age do you expect to retire from your main job?  
Range: 18 ... 150  
998 (Don't know)  
999 (Refusal)

**ASK ALL**

Q808 [DVRetAge]  
Computed variable - whether expects to retire before, at, or after 65  
1 before 65  
2 at 65  
3 after 65 including not planning to retire  
4 other - no main job/DK when will retire  
8 (Don't know)  
9 (Refusal)

**IF 'before 65' OR 'at 65' AT [DVRetAge]**

Q809 [WhyRtE]  
CARD K11  
You have told us that you expect to retire from your main job ^BefAft age 65. Using this card, which is the main reason for this?  
1 Because you can receive state benefits (e.g State Pension or Pension Credit)  
2 Because you can receive occupational or personal pension  
3 To retire at same time as partner  
4 Because you can afford to  
5 Because you want to  
6 Because of ill-health  
7 Because you don't expect your employer will allow you to work beyond this age  
8 Some other reason (PLEASE SPECIFY)  
98 (Don't know)  
99 (Refusal)

**IF 'Some other reason' AT [WhyRtE]**

Q810 [othspec] \$  
WRITE IN OTHER ANSWER GIVEN  
Open Question (Maximum of 120 characters)

**IF after 65' AT [DVRetAge]**

Q812 [WhyRtL]  
CARD K12  
You have told us that you expect to retire from your main job after age 65 (if at all). Using this card, which is the main reason for this?  
1 Because you enjoy working  
2 Because you can't afford to stop earning money  
3 Because your employer will allow you to work beyond 65  
4 Because you are not sure what else to do  
5 Some other reason (PLEASE SPECIFY)

6 EDIT ONLY: Because that's the age at which people will retire in the  
future/ because State Pension Age is increasing  
8 (Don't know)  
9 (Refusal)

**IF 'Some other reason' AT [WhyRtL]**

Q813 [othspec] \$  
WRITE IN OTHER ANSWER GIVEN  
Open Question (Maximum of 120 characters)

**ASK ALL THOSE CURRENTLY IN WORK**

Q815 [Wk65I] \*  
CARD K13  
(And how much do you agree or disagree...)  
...I would want to work past age 65?

Q816 [Wk65Flx] \*  
CARD K13 AGAIN  
(And how much do you agree or disagree...)  
...I would want to work past age 65 if I could work flexibly. This could  
involve working fewer hours, shorter weeks or just part of the year?

\* [Wk65I] AND [Wk65Flx]

1 Agree strongly  
2 Agree  
3 Neither agree nor disagree  
4 Disagree  
5 Disagree strongly  
8 (Don't know)  
9 (Refusal)

Q817 [WorkOld2]  
Does your employer currently allow people to carry on working past age  
65 if they want to?

1 Yes  
2 No  
8 (Don't know)  
9 (Refusal)

**IF 'Yes' AT [WorkOld2]**

Q818 [WkOldFlx]  
CARD K14  
How likely is it that your employer would allow you to work flexibly  
once you reach age 65. This could involve working fewer hours, shorter  
weeks or just part of the year?

1 Very likely  
2 Likely  
3 Neither likely nor unlikely  
4 Unlikely  
5 Very unlikely  
8 (Don't know)  
9 (Refusal)

**ASK ALL THOSE CURRENTLY IN WORK**

Q819 [IllRet]  
CARD K15  
Imagine that you thought you would have poor health when you reached  
retirement. Which of these statements comes closest to your view?

1 I would want to retire early to have a period of retirement in good  
health, even if this meant a smaller pension,  
OR

2 I would want to continue working until State Pension Age to ensure I was  
better off, even if this meant I would have poor health for my  
retirement  
8 (Don't know)  
9 (Refusal)

## Politics (version C)

### VERSION C: ASK ALL

Q821 [BTime] <sup>104</sup> (NOT ON SCREEN)

Start time of BPol10 block

Range: 0 ... 1440

Q822 [Voted]

Talking to people about the general election on the 6th of May, we have found that a lot of people didn't manage to vote. How about you - did you manage to vote in the general election?

IF NOT ELIGIBLE / TOO YOUNG TO VOTE: CODE 'NO'.

1 Yes, voted

2 No

8 (Don't know)

9 (Refusal)

### IF 'Yes, voted' AT [Voted]

Q823 [Vote]

Which party did you vote for in the general election?

DO NOT PROMPT

1 Conservative

2 Labour

3 Liberal Democrat

4 Scottish National Party

5 Plaid Cymru

6 Green Party

7 UK Independence Party (UKIP)

8 British National Party (BNP)/ National Front

9 RESPECT/ Scottish Socialist Party (SSP)/ Socialist Party

10 Other party (WRITE IN)

97 Refused to say

98 (Don't know)

99 (Refusal)

### IF 'Other party' AT [Vote]

Q824 [othspec] \$

WRITE IN OTHER ANSWER GIVEN

Open Question (Maximum of 120 characters)

### VERSION C: ASK ALL

Q826 [GovTrust] \*

CARD L1

How much do you trust British governments of any party to place the needs of the nation above the interests of their own political party?

Please choose a phrase from this card.

Q827 [MPsTrust] \*

CARD L1 AGAIN

And how much do you trust politicians of any party in Britain to tell the truth when they are in a tight corner?

\* [GovTrust] AND [MPsTrust]

1 Just about always

2 Most of the time

3 Only some of the time

4 Almost never

---

<sup>104</sup> Computed

8 (Don't know)  
9 (Refusal)

Q828 [SocTrust]  
Generally speaking, would you say that most people can be trusted, or that you can't be too careful in dealing with people?  
1 Most people can be trusted  
2 Can't be too careful in dealing with people  
8 (Don't know)  
9 (Refusal)

Q829 [LoseTch] \*  
CARD L2  
Using this card, please say how much you agree or disagree with this statement:  
Generally speaking those we elect as MPs lose touch with people pretty quickly.

Q830 [VoteIntr] \*  
CARD L2 AGAIN  
(Using this card, please say how much you agree or disagree with this statement:)  
Parties are only interested in people's votes, not in their opinions.

Q831 [PtyNMat2] \*  
CARD L2 AGAIN  
(Using this card, please say how much you agree or disagree with this statement:)  
It doesn't really matter which party is in power, in the end things go on much the same.

\* [LoseTch] TO [PtyNMat2]  
1 Agree strongly  
2 Agree  
3 Neither agree nor disagree  
4 Disagree  
5 Disagree strongly  
6 (SPONTANEOUS: It depends on the level of government)  
8 (Don't know)  
9 (Refusal)

**IF 'England' AT [Country]**

Q832 [EngParl]  
CARD L3  
With all the changes going on in the way the different parts of Great Britain are run, which of the following do you think would be best for England ...READ OUT...  
1 ...for England to be governed as it is now, with laws made by the UK parliament,  
2 for each region of England to have its own assembly that runs services like health,  
3 or, for England as a whole to have its own new parliament with law-making powers?  
4 (None of these)  
8 (Don't know)  
9 (Refusal)

**VERSION C: ASK ALL**

Q833 [UKSpenGB]  
CARD L4

Would you say that compared with other parts of the United Kingdom, Scotland gets **pretty much** its fair share of government spending, **more** than its fair share, or **less** than its fair share of government spending? Please choose your answer from this card.

- 1 Much more than its fair share of government spending
- 2 A little more than its fair share of government spending
- 3 Pretty much its fair share of government spending
- 4 A little less than its fair share of government spending
- 5 Much less than its fair share of government spending
- 8 (Don't know)
- 9 (Refusal)

Q834 [Politics]  
How much interest do you generally have in what is going on in politics ...READ OUT ...

- 1 ... a great deal,
- 2 quite a lot,
- 3 some,
- 4 not very much,
- 5 or, none at all?
- 8 (Don't know)
- 9 (Refusal)

Q835 [Lords00]  
CARD L5  
Which of the statements on this card comes closest to your view about what should happen to the House of Lords.

- 1 All or most of its members should be appointed
- 2 All or most of its members should be elected
- 3 It should contain roughly an equal number of appointed and elected members
- 4 It should be abolished
- 8 (Don't know)
- 9 (Refusal)

Q836 [Coalitin]  
Which do you think would generally be better for Britain nowadays ...  
READ OUT ...

- 1 ...to have a government at Westminster formed by one political party on its own,
- 2 or, to have a government at Westminster formed by two political parties together - in coalition?
- 8 (Don't know)
- 9 (Refusal)

Q837 [VoteSyst]  
Some people say we should change the voting system for general elections to the UK House of Commons to allow smaller political parties to get a fairer share of MPs. Others say that we should keep the voting system for the House of Commons as it is to produce effective government. Which view comes **closer** to your own ...  
READ OUT ...

- 1 IF ASKED: THIS REFERS TO 'PROPORTIONAL REPRESENTATION'
- 2 ... that we should change the voting system for the House of Commons,
- 3 or, keep it as it is?
- 8 (Don't know)
- 9 (Refusal)

Q838 [GovtWork]  
CARD L6

Which of these statements best describes your opinion on the present system of governing Britain?

- 1 Works extremely well and could not be improved
- 2 Could be improved in small ways but mainly works well
- 3 Could be improved quite a lot
- 4 Needs a great deal of improvement
- 8 (Don't know)
- 9 (Refusal)

Q839 [ConLabDf]

Now considering everything the Conservative and Labour parties stand for, would you say that ... READ OUT ...

- 1 ... there is a great difference between them,
- 2 some difference,
- 3 or, not much difference?
- 8 (Don't know)
- 9 (Refusal)

Q840- [GECamp]

Q849 CARD L7

During the campaign in the run up to the general election on May the 6th, did you do any of the things listed on this card?

PROBE: Which others?

CODE ALL THAT APPLY

Multicoded (Maximum of 10 codes)

- 1 Read a leaflet or other printed material produced by a party or candidate [GECmLeaf]
- 2 Watched a Party Election Broadcast or film produced by a party or candidate [GECmPEB]
- 3 Contacted someone from a political party or a candidate in person, by phone, or by letter [GECmCont]
- 4 Watched or listened to one or more of the UK leaders debates on television or radio [GECmDbt]
- 5 Watched or listened to any other TV programme or radio show specifically about the election [GECmTVPr]
- 6 Read articles in a newspaper specifically about the election [GECmNPap]
- 7 Wrote to or telephoned a newspaper, television or radio programme about the election [GECmWrot]
- 8 Attended a public meeting or event about the election [GECmMeet]
- 9 Was contacted by someone from a party or candidate in person or by phone [GECmWCon]
- 10 Discussed the election with friends or family in person or by phone [GECmDisc]
- 11 Tried to persuade someone else to vote for a particular party or candidate by phone [GECmPers]
- 12 **None of these** [GECmNone]
- 98 (Don't know)
- 99 (Refusal)

**IF Resp uses the internet ('Yes' AT [WWWUse] OR 'Yes' AT [WWWWork])**

Q862- [GECampWW]

Q869 CARD L8

Still thinking about the general election campaign, did you do any of the things listed on this card?

PROBE: Any others?

CODE ALL THAT APPLY

Multicoded (Maximum of 8 codes)

- |    |                                                                                                      |            |
|----|------------------------------------------------------------------------------------------------------|------------|
| 1  | Looked at the official website of a political party or candidate                                     | [GECWPWeb] |
| 2  | Read a blog or twitter about the election                                                            | [GECWBlo2] |
| 3  | Looked at any other kind of website for information about the election                               | [GECWOWeb] |
| 4  | Contacted a political party or candidate via email or the internet                                   | [GECWSEm2] |
| 5  | Was contacted by a political party or candidate via email or the internet                            | [GECWWEm2] |
| 6  | Contacted a newspaper, television or radio programme about the election via email or the internet    | [GECWNP2]  |
| 7  | Discussed the election with friends or family via the internet or email                              | [GECWFrie] |
| 8  | Tried to persuade someone else to vote for a particular party or candidate via email or the internet | [GECWPers] |
| 9  | None of these                                                                                        | [GECWNone] |
| 98 | (Don't know)                                                                                         |            |
| 99 | (Refusal)                                                                                            |            |

**VERSION C: ASK ALL**

Q879 [GovNoSay] \*

CARD L9

Please choose a phrase from this card to say how much you agree or disagree with the following statements.

People like me have no say in what the government does.

Q880 [VoteOnly] \*

CARD L9 AGAIN

(Please choose a phrase from this card to say how much you agree or disagree with this statement:)

Voting is the only way people like me can have any say about how the government runs things.

Q881 [GovComp] \*

CARD L9 AGAIN

(Please choose a phrase from this card to say how much you agree or disagree with this statement:)

Sometimes politics and government seem so complicated that a person like me cannot really understand what is going on.

\* [GovNoSay] TO [GovComp]

- |   |                            |
|---|----------------------------|
| 1 | Agree strongly             |
| 2 | Agree                      |
| 3 | Neither agree nor disagree |
| 4 | Disagree                   |
| 5 | Disagree strongly          |
| 8 | (Don't know)               |
| 9 | (Refusal)                  |

## Political and social attitudes (version C)

### VERSION C: ASK ALL

Q884 [BTime] <sup>105</sup> (NOT ON SCREEN)

Start time of BPolSoc block

Range: 0 ... 1440

9998 (Don't know)

9999 (Refusal)

Q885 [PMS] \*

CARD M1

Now I would like to ask you some questions about sexual relationships.  
If a man and woman have sexual relations before marriage, what would  
your general opinion be?

Q886 [HomoSex] \*

CARD M1 AGAIN

What about sexual relations between two adults of the same sex?

\* [PMS] AND [HomoSex]

1 Always wrong

2 Mostly wrong

3 Sometimes wrong

4 Rarely wrong

5 Not wrong at all

6 (Depends/varies)

8 (Don't know)

9 (Refusal)

Q887 [CanLegal]

CARD M2

Which of these statements comes closest to your own view?

1 Taking cannabis should be legal, without restrictions

2 Taking cannabis should be legal, but it should only be available from  
licensed shops

3 Taking cannabis should remain illegal

8 (Don't know)

9 (Refusal)

## Classification (all versions)

### VERSIONS A AND B: ASK ALL

Q889 [BTime]<sup>106</sup> **(NOT ON SCREEN)**  
Start time of BClassif block  
Range: 0 ... 1440  
9998 (Don't know)  
9999 (Refusal)

Q890 [PrejNow]  
Do you think there is generally more racial prejudice in Britain now than there was 5 years ago, less, or about the same amount?  
1 More now  
2 Less now  
3 About the same  
7 Other (WRITE IN)  
8 (Don't know)  
9 (Refusal)

### IF 'Other' AT [PrejNow]

Q891 [othspec] \$  
WRITE IN OTHER ANSWER GIVEN  
Open Question (Maximum of 120 characters)

### VERSIONS A AND B: ASK ALL

Q893 [PrejFut]  
Do you think there will be more, less, or about the same amount of racial prejudice in Britain in 5 years time compared with now?  
1 More in 5 years  
2 Less  
3 About the same  
7 Other (WRITE IN)  
8 (Don't know)  
9 (Refusal)

### IF 'Other' AT [PrejFut]

Q894 [othspec] \$  
WRITE IN OTHER ANSWER GIVEN  
Open Question (Maximum of 120 characters)

### VERSIONS A AND B: ASK ALL

Q896 [SRPrej]  
How would you describe yourself ... READ OUT ...  
1 ... as very prejudiced against people of other races,  
2 a little prejudiced,  
3 or, not prejudiced at all?  
7 Other (WRITE IN)  
8 (Don't know)  
9 (Refusal)

### IF 'Other' AT [SRPrej]

Q897 [othspec] \$  
WRITE IN OTHER ANSWER GIVEN  
Open Question (Maximum of 120 characters)

### ASK ALL

Q899 [ResPres]

---

<sup>106</sup> Computed

Can I just check, would you describe the place where you live as ...  
READ OUT ...

- 1 ...a big city,
- 2 the suburbs or outskirts of a big city,
- 3 a small city or town,
- 4 a **country** village,
- 5 or, a farm or home in the country?
- 7 (Other answer (WRITE IN))
- 8 (Don't know)
- 9 (Refusal)

**IF 'Other answer' AT [ResPres]**

Q900 [othspec] \$  
WRITE IN OTHER ANSWER GIVEN  
Open Question (Maximum of 120 characters)

**ASK ALL**

Q902 [RelRFW] <sup>107</sup> \$  
Do you regard yourself as belonging to any particular religion?  
IF YES: Which?  
CODE ONE ONLY - DO NOT PROMPT

- 1 No religion
- 2 Christian - no denomination
- 3 Roman Catholic
- 4 Church of England/Anglican
- 5 Baptist
- 6 Methodist
- 7 Presbyterian/Church of Scotland
- 8 Free Presbyterian
- 9 Brethren
- 10 United Reform Church (URC)/Congregational
- 11 Other Protestant (WRITE IN)
- 12 Other Christian (WRITE IN)
- 13 Hindu
- 14 Jewish
- 15 Islam/Muslim
- 16 Sikh
- 17 Buddhist
- 18 Other non-Christian (WRITE IN)
- 97 Refusal
- 98 (Don't know)
- 99 (Refusal)

**IF 'Other Protestant' AT [RelRFW]**

Q903 [othspec] \$  
WRITE IN OTHER ANSWER GIVEN  
Open Question (Maximum of 120 characters)

**IF 'Other Christian' AT [RelRFW]**

Q905 [othspec] \$  
WRITE IN OTHER ANSWER GIVEN  
Open Question (Maximum of 120 characters)

**IF 'Other non-Christian' AT [RelRFW]**

Q907 [othspec] \$  
WRITE IN OTHER ANSWER GIVEN  
Open Question (Maximum of 120 characters)

Q909 [Religion] <sup>108</sup> **(NOT ON SCREEN)**

---

<sup>107</sup> See derived variables [Religion] and [ReligSum].

Do you regard yourself as belonging to any particular religion? Which?  
dv

- 1 No religion
- 2 Christian - no denomination
- 3 Roman Catholic
- 4 Church of England/Anglican
- 5 Baptist
- 6 Methodist
- 7 Presbyterian/Church of Scotland
- 8 Other Christian
- 9 Hindu
- 10 Jewish
- 11 Islam/Muslim
- 12 Sikh
- 13 Buddhist
- 14 Other non-Christian
- 21 Free Presbyterian
- 22 Brethren
- 23 United Reform Church (URC)/Congregational
- 27 Other Protestant
- 98 (Don't know)
- 99 (Refusal)

Q910 [ReligSum] <sup>109</sup> **(NOT ON SCREEN)**

Respondent's religion <summary> dv

- 1 Church of England/Anglican
- 2 Roman Catholic
- 3 Other Christian
- 4 Non-Christian
- 5 No religion
- 6 Refused/Not answered/DK
- 8 (Don't know)
- 9 (Refusal)

Q911 [RelFFW] <sup>110</sup> \$

In what religion, if any, were you brought up?

PROBE IF NECESSARY: What was your family's religion?

CODE ONE ONLY - DO NOT PROMPT

- 1 No religion
- 2 Christian - no denomination
- 3 Roman Catholic
- 4 Church of England/Anglican
- 5 Baptist
- 6 Methodist
- 7 Presbyterian/Church of Scotland
- 8 Free Presbyterian
- 9 Brethren
- 10 United Reform Church (URC)/Congregational
- 11 Other Protestant (WRITE IN)
- 12 Other Christian (WRITE IN)
- 13 Hindu
- 14 Jewish
- 15 Islam/Muslim
- 16 Sikh
- 17 Buddhist
- 18 Other non-Christian (WRITE IN)
- 97 Refusal

---

<sup>108</sup> Derived from [RelRFW].

<sup>109</sup> Derived from [RelRFW].

<sup>110</sup> See derived variables [FamRel] and [RlFamSum].

98 (Don't know)  
99 (Refusal)

**IF 'Other Protestant' AT [RelFFW]**  
Q912 [othspec] \$  
WRITE IN OTHER ANSWER GIVEN  
Open Question (Maximum of 120 characters)

**IF 'Other Christian' AT [RelFFW]**  
Q914 [othspec] \$  
WRITE IN OTHER ANSWER GIVEN  
Open Question (Maximum of 120 characters)

**IF 'Other non-Christian' AT [RelFFW]**  
Q916 [othspec] \$  
WRITE IN OTHER ANSWER GIVEN  
Open Question (Maximum of 120 characters)

Q918 [Famrelig] <sup>111</sup> **(NOT ON SCREEN)**  
In what religion, if any, were you brought up? dv  
1 No religion  
2 Christian - no denomination  
3 Roman Catholic  
4 Church of England/Anglican  
5 Baptist  
6 Methodist  
7 Presbyterian/Church of Scotland  
8 Other Christian  
9 Hindu  
10 Jewish  
11 Islam/Muslim  
12 Sikh  
13 Buddhist  
14 Other non-Christian  
21 Free Presbyterian  
22 Brethren  
23 United Reform Church (URC)/Congregational  
27 Other Protestant  
98 (Don't know)  
99 (Refusal)

Q919 [RlFamSum] <sup>112</sup> **(NOT ON SCREEN)**  
In what religion, if any, were you brought up?(grouped) dv  
1 Church of England/Anglican  
2 Roman Catholic  
3 Other Christian  
4 Non-Christian  
5 No religion  
6 Refused/Not answered/DK  
8 (Don't know)  
9 (Refusal)

**IF RELIGION GIVEN AT [RelRFW] OR AT [RelFFW] AND NO REFUSAL AT EITHER**  
Q920 [ChAttend]  
Apart from such special occasions as weddings, funerals and baptisms,  
how often nowadays do you attend services or meetings connected with  
your religion?  
PROBE AS NECESSARY.

---

<sup>111</sup> Derived from [RelFFW].

<sup>112</sup> Derived from [RelFFW].

1 Once a week or more  
 2 Less often but at least once in two weeks  
 3 Less often but at least once a month  
 4 Less often but at least twice a year  
 5 Less often but at least once a year  
 6 Less often than once a year  
 7 Never or practically never  
 8 Varies too much to say  
 98 (Don't know)  
 99 (Refusal)

Q921- [NationU] \$ <sup>113</sup>

Q929 CARD M3

Please say which, if any, of the words on this card describes the way **you** think of **yourself**. Please choose as many or as few as apply.

PROBE: Which others?

Multicoded (Maximum of 9 codes)

|    |                                      |            |
|----|--------------------------------------|------------|
| 1  | British                              | [NatBrit]  |
| 2  | English                              | [NatEng]   |
| 3  | European                             | [NatEuro]  |
| 4  | Irish                                | [NatIrish] |
| 5  | Northern Irish                       | [NatNI]    |
| 6  | Scottish                             | [NatScot]  |
| 7  | Ulster                               | [NatUlst]  |
| 8  | Welsh                                | [NatWelsh] |
| 9  | Other answer (WRITE IN)              | [NatOth]   |
| 10 | (None of these)                      | [NatNone]  |
| 11 | OTHER - ASIAN MENTIONED              | [NatAsia]  |
| 12 | OTHER - AFRICAN /CARIBBEAN MENTIONED | [Natfric]  |
| 98 | (Don't know)                         |            |
| 99 | (Refusal)                            |            |

**IF 'Other answer' AT [NationU]**

Q930 [othspec] \$

WRITE IN OTHER ANSWER GIVEN

Open Question (Maximum of 120 characters)

**IF MORE THAN ONE ANSWER AT [NationU]**

Q944 [BNationU] <sup>114</sup>

CARD M3 AGAIN

And if you had to choose, which one **best** describes the way you think of yourself?

|    |                                    |
|----|------------------------------------|
| 1  | British                            |
| 2  | English                            |
| 3  | European                           |
| 4  | Irish                              |
| 5  | Northern Irish                     |
| 6  | Scottish                           |
| 7  | Ulster                             |
| 8  | Welsh                              |
| 9  | Other answer (WRITE IN)            |
| 10 | (None of these)                    |
| 11 | OTHER ASIAN MENTIONED              |
| 12 | OTHER AFRICAN /CARIBBEAN MENTIONED |
| 98 | (Don't know)                       |
| 99 | (Refusal)                          |

---

<sup>113</sup> See derived variables [NatBrit], [NatEng], [NatEuro], [NatIrish], [NatNI], [NatScot], [NatUlst], [NatWelsh], [NatOth], [NatNone], [NatAsia], [NatAfric] and [BestNatU].

<sup>114</sup> See also derived variable [BestNatU].

**IF 'other answer' AT [BNationU]**

Q945 [othspec] \$  
 WRITE IN OTHER ANSWER GIVEN  
 Open Question (Maximum of 120 characters)

**ASK ALL**

Q947 [BestNatU]<sup>115</sup> **(NOT ON SCREEN)**  
 Which nationality best describes R? dv

1 British  
 2 English  
 3 European  
 4 Irish  
 5 Northern Irish  
 6 Scottish  
 7 Ulster  
 8 Welsh  
 9 Other answer (WRITE IN)  
 10 (None of these)  
 98 (Don't know)  
 99 (Refusal)

Q948 [RaceOri3]  
 CARD M4  
 To which of these groups do you consider you belong?

1 BLACK: of African origin  
 2 BLACK: of Caribbean origin  
 3 BLACK: of other origin (WRITE IN)  
 4 ASIAN: of Indian origin  
 5 ASIAN: of Pakistani origin  
 6 ASIAN: of Bangladeshi origin  
 7 ASIAN: of Chinese origin  
 8 ASIAN: of other origin (WRITE IN)  
 9 WHITE: of any origin  
 10 MIXED ORIGIN (WRITE IN)  
 11 OTHER (WRITE IN)  
 98 (Don't know)  
 99 (Refusal)

**IF 'black of other origin' AT [RaceOri2]**

Q949 [othspec] \$  
 WRITE IN OTHER ANSWER GIVEN  
 Open Question (Maximum of 120 characters)

**IF 'Asian of other origin' AT [RaceOri2]**

Q951 [othspec] \$  
 WRITE IN OTHER ANSWER GIVEN  
 Open Question (Maximum of 120 characters)

**IF 'mixed origin' AT [RaceOri2]**

Q953 [othspec] \$  
 WRITE IN OTHER ANSWER GIVEN  
 Open Question (Maximum of 120 characters)

**IF 'other' AT [RaceOri2]**

Q955 [othspec] \$  
 WRITE IN OTHER ANSWER GIVEN  
 Open Question (Maximum of 120 characters)

---

<sup>115</sup> Derived from [NationU] and [BNationU].

**ASK ALL**

Q957 [DisNew2]  
Do you have a long-standing physical or mental health condition or disability? By long-standing, I mean anything that has lasted at least 12 months or that is likely to last at least 12 months?

1 Yes  
2 No  
8 (Don't know)  
9 (Refusal)

**IF 'Yes' AT [DisNew2]**

Q958 [DisAct]  
Does this condition or disability have a substantial adverse effect on your ability to carry out normal day-to-day activities?

1 Yes  
2 No  
8 (Don't know)  
9 (Refusal)

## Education

### VERSION C: ASK ALL

Q959 [QPrivEd] <sup>116</sup> \*  
Have you ever attended a fee-paying, **private** primary or secondary school in the United Kingdom?  
`PRIVATE' PRIMARY OR SECONDARY SCHOOLS INCLUDE:  
\* INDEPENDENT SCHOOLS  
\* SCHOLARSHIPS AND ASSISTED PLACES AT FEE-PAYING SCHOOLS  
THEY EXCLUDE:  
\* DIRECT GRANT SCHOOLS (UNLESS FEE-PAYING)  
\* VOLUNTARY-AIDED SCHOOLS  
\* GRANT-MAINTAINED (`OPTED OUT') SCHOOLS  
\* NURSERY SCHOOLS  
1 Yes  
2 No  
8 (Don't know)  
9 (Refusal)

### IF NO CHILDREN IN THE HOUSEHOLD (AS GIVEN IN THE HOUSEHOLD GRID)

Q961 [OthChld3]  
Have you ever been responsible for bringing up any children of school age, including stepchildren?  
1 Yes  
2 No  
8 (Don't know)  
9 (Refusal)

### VERSION C: IF CHILDREN IN THE HOUSEHOLD OR 'yes' AT [OthChld3]

Q962 [QPrivEd] <sup>117</sup> \*  
And (have any of your children / has your child) **ever attended** a fee-paying, **private** primary or secondary school in the United Kingdom?  
`PRIVATE' PRIMARY OR SECONDARY SCHOOLS INCLUDE:  
\* INDEPENDENT SCHOOLS  
\* SCHOLARSHIPS AND ASSISTED PLACES AT FEE-PAYING SCHOOLS  
THEY EXCLUDE:  
\* DIRECT GRANT SCHOOLS (UNLESS FEE-PAYING)  
\* VOLUNTARY-AIDED SCHOOLS  
\* GRANT-MAINTAINED (`OPTED OUT') SCHOOLS  
\* NURSERY SCHOOLS  
1 Yes  
2 No  
8 (Don't know)  
9 (Refusal)

### VERSION C: ASK ALL

Q964 [PrivEd2] <sup>118</sup> (**NOT ON SCREEN**)  
R/spouse/partner/child attend UK fee-paying primary/secondary school Dv  
1 Resp attended priv school  
2 Resp not, but partner/child  
3 No one attended priv school  
4 Missing info  
8 (Don't know)  
9 (Refusal)

---

<sup>116</sup> Called [RPrivEd] on SPSS file. See also derived variable [PrivEd2].

<sup>117</sup> Called [ChPrivEd] on SPSS file. See also derived variable [PrivEd2].

<sup>118</sup> Derived from [RPrivEd] and [ChPrivEd].

**ASK ALL**

Q965 [Tea2]  
How old were you when you completed your continuous full-time education?  
PROBE IF NECESSARY  
`STILL AT SCHOOL' - CODE 95  
`STILL AT COLLEGE OR UNIVERSITY' - CODE 96  
`OTHER ANSWER' - CODE 97 AND WRITE IN  
Range: 1 ... 97  
98 (Don't know)  
99 (Refusal)

**IF 'other answer' AT [TEA2]**

Q966 [othspec] \$  
WRITE IN OTHER ANSWER GIVEN  
Open Question (Maximum of 120 characters)

**ASK ALL**

Q968 [Tea] <sup>119</sup> **(NOT ON SCREEN)**  
R how old when completed continuous fulltime education?[compressed] dv  
1 15 or under  
2 16  
3 17  
4 18  
5 19 or over  
6 Still at school  
7 Still at college or university  
97 Other answer (WRITE IN)  
98 (Don't know)  
99 (Refusal)

Q969 [SchQual]  
CARD M5  
Have you passed any of the examinations on this card?  
1 Yes  
2 No  
8 (Don't know)  
9 (Refusal)

**IF 'yes' AT [SchQual]**

Q970- [SchQFW] \$ <sup>120</sup>  
Q973 CARD M5 AGAIN Please tell me which sections of the card they are in?  
PROBE : Which other sections?  
CODE ALL THAT APPLY  
Multicoded (Maximum of 4 codes)

1 **Section 1:** [EdQual1]  
GCSE Grades D-G  
Short course GCSE  
Vocational GCSE  
CSE Grades 2-5  
GCE O-level grades D-E or 7-9  
Scottish SCE Ordinary Bands D-E  
Scottish Standard Grades 4-7  
SCOTVEC/SQA National Certificate modules  
Scottish School Leaving Certificate - no grade  
Scottish Access 1-3  
Scottish Intermediate 1 at grades B-D

---

<sup>119</sup> Derived from [TEA2].

<sup>120</sup> See derived variables [EdQual1], [EdQual2], [EdQual3], [EdQual4], [HEdQual1] and [HEdQual2].

|                |                                                                                                                                                                                                                                                                                                                                                                                               |            |
|----------------|-----------------------------------------------------------------------------------------------------------------------------------------------------------------------------------------------------------------------------------------------------------------------------------------------------------------------------------------------------------------------------------------------|------------|
| 2              | <b>Section 2:</b><br>GCSE Grades A*-C<br>CSE Grade 1<br>GCE O-level Grades A-C or 1-6<br>School Certificate or Matriculation<br>Scottish SCE Ordinary Bands A-C or Pass<br>Scottish Standard Grades 1-3 or Pass<br>Scottish School Leaving Certificate Lower Grade<br>SUPE Ordinary<br>Northern Ireland Junior Certificate<br>SQA Intermediate 1 at Grade A<br>SQA Intermediate 2 (any grade) | [EdQual2]  |
| 3              | <b>Section 3:</b><br>GCE A-level, S-level, A2-level, AS-level<br>International Baccalaureate<br>Vocational A-level (AVCE)<br>Scottish Higher<br>Scottish SCE/SLC/SUPE at Higher Grade<br>Scottish Higher School Certificate<br>Certificate of Sixth Year Studies/ Advanced Higher Grades<br>Northern Ireland Senior Certificate<br>Welsh Baccalaureate                                        | [EdQual3]  |
| 4              | <b>Section 4:</b><br>Overseas school leaving exam or certificate                                                                                                                                                                                                                                                                                                                              | [EdQual4]  |
| 8              | (Don't know)                                                                                                                                                                                                                                                                                                                                                                                  |            |
| 9              | (Refusal)                                                                                                                                                                                                                                                                                                                                                                                     |            |
|                | <b>ASK ALL</b>                                                                                                                                                                                                                                                                                                                                                                                |            |
| Q974           | [PschQual]<br>CARD M6<br>And have you passed any of the exams or got any of the qualifications on<br><b>this</b> card?                                                                                                                                                                                                                                                                        |            |
| 1              | Yes                                                                                                                                                                                                                                                                                                                                                                                           |            |
| 2              | No                                                                                                                                                                                                                                                                                                                                                                                            |            |
| 8              | (Don't know)                                                                                                                                                                                                                                                                                                                                                                                  |            |
| 9              | (Refusal)                                                                                                                                                                                                                                                                                                                                                                                     |            |
|                | <b>IF 'yes' AT [PSchQual]</b>                                                                                                                                                                                                                                                                                                                                                                 |            |
| Q975-<br>Q1000 | [PSchQFW] \$ <sup>121</sup><br>CARD M6 AGAIN<br>Which ones?<br>PROBE: Which others?<br>PROBE FOR CORRECT LEVEL<br>Multicoded (Maximum of 26 codes)                                                                                                                                                                                                                                            |            |
| 1              | Univ/CNAA <b>first</b> degree                                                                                                                                                                                                                                                                                                                                                                 | [EdQual38] |
| 2              | Univ/CNAA diploma / Foundation Degree                                                                                                                                                                                                                                                                                                                                                         | [EdQual39] |
| 3              | Postgraduate degree                                                                                                                                                                                                                                                                                                                                                                           | [EdQual36] |
| 4              | Teacher training qualification                                                                                                                                                                                                                                                                                                                                                                | [EdQual12] |
| 5              | Nursing qualification                                                                                                                                                                                                                                                                                                                                                                         | [EdQual13] |
| 6              | Foundation/advanced (modern) apprenticeship                                                                                                                                                                                                                                                                                                                                                   | [EdQual26] |
| 7              | Other recognised trade apprenticeship                                                                                                                                                                                                                                                                                                                                                         | [EdQual27] |

<sup>121</sup> See derived variables [EdQual38], [EdQual39], [EdQual36], [EdQual12], [EdQual13], [EdQual26], [EdQual27], [EdQual28], [EdQual29], [EdQual30], [EdQual31], [EdQual32], [EdQual22], [EdQual23], [EdQual24], [EdQual25], [EdQual33], [EdQual34], [EdQual10], [EdQual11], [EdQual17], [EdQual18], [EdQual19], [EdQual20], [EdQual21], [EdQual37], [HEdQual] and [HEdQual2].

|    |                                                                              |            |
|----|------------------------------------------------------------------------------|------------|
| 8  | OCR/RSA - (Vocational) Certificate                                           | [EdQual28] |
| 9  | OCR/RSA - (First) Diploma                                                    | [EdQual29] |
| 10 | OCR/RSA - Advanced Diploma                                                   | [EdQual30] |
| 11 | OCR/RSA - Higher Diploma                                                     | [EdQual31] |
| 12 | Other clerical, commercial qualification                                     | [EdQual32] |
| 13 | City&Guilds - Level 1/ Part I                                                | [EdQual22] |
| 14 | City&Guilds - Level 2/ Craft/ Intermediate/ Ordinary/ Part II                | [EdQual23] |
| 15 | City&Guilds - Level 3/Advanced/ Final/ Part III                              | [EdQual24] |
| 16 | City&Guilds - Level 4/Full Technological/ Part IV                            | [EdQual25] |
| 17 | Edexcel/BTEC First Certificate                                               | [EdQual33] |
| 18 | Edexcel/BTEC First/General Diploma                                           | [EdQual34] |
| 19 | Edexcel/BTEC/BEC/TEC (General/Ordinary) National Certif or Diploma (ONC/OND) | [EdQual10] |
| 20 | Edexcel/BTEC/BEC/TEC <b>Higher</b> National Certif (HNC) or Diploma (HND)    | [EdQual11] |
| 21 | NVQ/SVQ Lev 1/GNVQ/GSVQ Foundation lev                                       | [EdQual17] |
| 22 | NVQ/SVQ Lev 2/GNVQ/GSVQ Intermediate lev                                     | [EdQual18] |
| 23 | NVQ/SVQ Lev 3/GNVQ/GSVQ Advanced lev                                         | [EdQual19] |
| 24 | NVQ/SVQ Lev 4                                                                | [EdQual20] |
| 25 | NVQ/SVQ Lev 5                                                                | [EdQual21] |
| 97 | Other recogn academic or vocational qual (WRITE IN)                          | [EdQual37] |
| 98 | (Don't know)                                                                 |            |
| 99 | (Refusal)                                                                    |            |

**IF 'other recogn academic or vocational qual' IN [PSchQFW]**

Q1001 [othspec] \$  
WRITE IN OTHER ANSWER GIVEN  
Open Question (Maximum of 120 characters)

**ASK ALL**

Q1033 [HEdQual] <sup>122</sup> **(NOT ON SCREEN)**  
Highest educational qual obtained - dv  
1 Degree  
2 Higher educ below degree  
3 A level or equiv  
4 O level or equiv  
5 CSE or equiv  
6 Foreign or other  
7 No qualification  
8 DK/Refusal/NA

Q1034 [HEdQual2] <sup>123</sup> **(NOT ON SCREEN)**  
Highest educational qual obtained (postgrad separate) - dv  
1 Postgraduate degree  
2 First degree  
3 Higher educ below degree  
4 A level or equiv  
5 O level or equiv  
6 CSE or equiv  
7 Foreign or other  
8 No qualification  
9 DK/Refusal/NA

<sup>122</sup> Derived from [SchQual], [SchQFW], [PSchQual] and [PSchQFW].

<sup>123</sup> Derived from [SchQual], [SchQFW], [PSchQual] and [PSchQFW].

## Spouse's job details

Q1036 [BTime] <sup>124</sup> \$ **(NOT ON SCREEN)**

Start time of EmpB block

Range: 0 ... 1440

**ASK ALL WHO ARE MARRIED, IN CIVIL PARTNERSHIP OR LIVING WITH A PARTNER  
(AT [MatSta2b])**

Q1037 [EconAct] <sup>125</sup> **(NOT ON SCREEN)**

Spouse: Economic activity in last week< Priority coded>

- 1 In full-time education (not paid for by employer, including on vacation)
- 2 On government training/employment programme
- 3 In paid work (or away temporarily) for at least 10 hours in week
- 4 Waiting to take up paid work already accepted
- 5 Unemployed and registered at a JobCentre or JobCentre Plus
- 6 Unemployed, @Unot@U registered, but actively looking for a job (of at least 10 hrs a week)
- 7 Unemployed, wanting a job (of at least 10 hrs per week) but @Unot@U actively looking for a job
- 8 Permanently sick or disabled
- 9 Wholly retired from work
- 10 Looking after the home
- 11 (Doing something else) (WRITE IN)
- 98 (Don't know)
- 99 (Refusal)

**ASK ALL THOSE WHOSE SPOUSE/PARTNER IS NOT WORKING OR WAITING TO TAKE UP WORK (I.E. 'in full-time education', 'on government training scheme', 'unemployed', 'permanently sick or disabled', 'wholly retired from work', 'looking after the home' OR 'doing something else' AT [SEconAc2])**

Q1038 [LastJob] <sup>126</sup> **(NOT ON SCREEN)**

How long ago did (he/she) last have a paid job of at least 10 hours a week?

GOVERNMENT PROGRAMMES/SCHEMES DO NOT COUNT AS 'PAID JOBS'.

- 1 Within past 12 months
- 2 Over 1, up to 5 years ago
- 3 Over 5, up to 10 years ago
- 4 Over 10, up to 20 years ago
- 5 Over 20 years ago
- 6 Never had a paid job of 10+ hours a week
- 8 (Don't know)
- 9 (Refusal)

**ASK ALL WITH SPOUSE/PARTNER WHO IS WORKING OR WAITING TO TAKE UP WORK**

Q1039 [Title] \$ <sup>127</sup>

Now I want to ask you about your (husband's/wife's/partner's) (present/future) job.

What (is his/her job / will that job be)?

PROBE IF NECESSARY: What is the name or title of the job?

Open Question (Maximum of 80 characters)

---

<sup>124</sup> Computed

<sup>125</sup> Called [SEconAct] on SPSS file. Derived from [SEconAc2] in household grid section of the questionnaire. See also derived variable [SEconSum].

<sup>126</sup> Called [SLastJob] on SPSS file. Derived from [SLastJb2] in household grid section of the questionnaire.

<sup>127</sup> See coded variable [S2SOC200] and derived variables [S2NSSEC], [S2Class] and [S2ClassG].

Q1040 [Typewk] \$  
 What kind of work (*does/will*) (*he/she*) do most of the time?  
 IF RELEVANT: What materials/machinery (*does/will*) (*he/she*) use?  
 Open Question (Maximum of 80 characters)

Q1041 [Train] \$  
 What training or qualifications are needed for that job?  
 Open Question (Maximum of 80 characters)

Q1042 [EmployA] <sup>128</sup>  
 In your (*husband's/wife's/partner's*) (main) job (*is/will*) (*he/she*)  
 (*be*) ... READ OUT ...  
 1 ... an employee,  
 2 or self-employed?  
 8 (Don't know)  
 9 (Refusal)

Q1044 [Superv] <sup>129</sup>  
 In your (*husband's/wife's/partner's*) job, (*does/will*) (*he/she*)  
 have any formal responsibility for supervising the work of other  
 (*employees/people*)?  
 DO NOT INCLUDE PEOPLE WHO ONLY SUPERVISE:  
 - CHILDREN, E.G. TEACHERS, NANNIES, CHILDMINDERS  
 - ANIMALS  
 - SECURITY OR BUILDINGS, E.G. CARETAKERS, SECURITY GUARDS  
 1 Yes  
 2 No  
 8 (Don't know)  
 9 (Refusal)

**ASK ALL WITH SPOUSE/PARTNER WHO IS WORKING OR WAITING TO TAKE UP WORK AS  
 EMPLOYEE ('employee' OR DON'T KNOW AT [EmployA])**

Q1047 [OcSect2] <sup>130</sup>  
 CARD M7  
 Which of the types of organisation on this card (*does/will*) your  
 (*husband/wife/partner*) (*work/be working*) for?  
 1 PRIVATE SECTOR FIRM OR COMPANY Including, for example, limited companies  
 and PLCs  
 2 NATIONALISED INDUSTRY OR PUBLIC CORPORATION Including, for example, the  
 Post Office and the BBC  
 3 OTHER PUBLIC SECTOR EMPLOYER  
 Incl eg: - Central govt/ Civil Service/ Govt Agency  
 - Local authority/ Local Educ Auth (INCL 'OPTED OUT' SCHOOLS)  
 - Universities  
 - Health Authority / NHS hospitals / NHS Trusts/ GP surgeries  
 - Police / Armed forces  
 4 CHARITY/ VOLUNTARY SECTOR Including, for example, charitable companies,  
 churches, trade unions  
 7 Other answer (WRITE IN)  
 8 EDIT ONLY: Self-employed  
 9 EDIT ONLY: Owns business / company  
 98 (Don't know)  
 99 (Refusal)

**IF 'other answer' AT [OcSect2]**

Q1048 [othspec] \$

---

<sup>128</sup> Called [S2Employ] on the SPSS file.

<sup>129</sup> Called [S2Superv] on the SPSS file.

<sup>130</sup> Called [S2OcSec2] on the SPSS file.

WRITE IN OTHER ANSWER GIVEN  
Open Question (Maximum of 120 characters)

**ASK ALL WITH SPOUSE/PARTNER WHO IS WORKING OR WAITING TO TAKE UP WORK**

- Q1055 [S2EmpWr2]<sup>131</sup>  
**IF EMPLOYEE:** Including your (*husband/wife/partner*), how many people are employed at the place where (*he/she*) usually (*works/will work*) from?  
**IF SELF-EMPLOYED:** (*Does/Will*) (*he/she*) have any employees?  
IF YES: PROBE FOR CORRECT PRECODE.  
0 (DO NOT USE IF EMPLOYEE/*No employees*)  
1 Under 10  
2 10-24  
3 25-49  
4 50-99  
5 100-199  
6 200-499  
7 500+  
8 (Don't know)  
9 (Refusal)
- Q1056 [S2EmpWrk]<sup>132</sup> **(NOT ON SCREEN)**  
No of employees at spouse/partner's workplace. DV  
0 None  
1 Under 10  
2 10-24  
3 25-99  
4 100-499  
5 500 or more  
8 (Don't know)  
9 (Refusal)
- Q1068 [S2PartFl]  
(*Is/Was*) the job ... READ OUT ...  
1 ... full-time - that is, 30 or more hours per week,  
2 or, part-time?  
8 (Don't know)  
9 (Refusal)
- Q1069 [EconSum]<sup>133</sup> **(NOT ON SCREEN)**  
Spouse/partner economic activity <summary> DV  
1 In full-time education/training  
2 In work, waiting to take up work  
3 Unemployed  
4 Retired  
5 Other  
8 (Don't know)  
9 (Refusal)
- Q1070 [EconPos]<sup>134</sup> **(NOT ON SCREEN)**  
Current economic position of spouse/partner  
1 Employee (full-time)  
2 Employee (part-time)  
3 Self-employed (f-t)  
4 Self-employed (p-t)

---

<sup>131</sup> See derived variable [S2EmpWrk]

<sup>132</sup> Derived from [S2EmpWr2].

<sup>133</sup> Called [SEconSum] on SPSS file. Derived from [EconAct].

<sup>134</sup> Called [SEconPos] on SPSS file. Derived from [EconAct], [EmployA] and [S2PartFl].

5 In work (status not known)  
 6 Waiting to take up work  
 7 Unemployed  
 8 Looking after the home  
 9 Retired  
 10 In f-t education  
 11 Other  
 98 (Don't know)  
 99 (Refusal)

Q1072 [EmpSta2] <sup>135</sup> **(NOT ON SCREEN)**

SPOUSE: R.G.employment status dv  
 1 Self-employed - 25+ employees  
 2 Self-employed - 1-24 employees  
 3 Self-employed - no employees  
 4 Self-employed - not known  
 5 Manager - 25+ employees  
 6 Manager - 1-24 employees  
 7 Manager - not known  
 8 Foreman/supervisor  
 9 Other employee  
 10 Employee - not known  
 11 Inadequately described/not stated

Q1075 [NSEG] <sup>136</sup> **(NOT ON SCREEN)**

Spouse/partner :SEG<grouped>[pre-SOC2000]best est. dv  
 1 Employer - large organisation  
 2 Manager - large organisation  
 3 Employer - small organisation  
 4 Manager - small organisation  
 5 Professional worker - self-employed  
 6 Professional worker - employee  
 7 Intermediate non-manual - ancillary  
 8 Intermediate non-manual - supervisor  
 9 Junior non-manual  
 10 Personal services  
 11 Foreman/supervisor - manual  
 12 Skilled manual  
 13 Semi-skilled manual  
 14 Unskilled manual  
 15 Own account worker (not professional)  
 16 Farmer - employer/manager  
 17 Farmer - own account  
 18 Agricultural worker  
 19 Member of armed forces  
 20 Inadequately described/not stated

Q1076 [NSocCl] <sup>137</sup> **(NOT ON SCREEN)**

Spouse or partner's :social class [pre-SOC2000]best estimate dv  
 1 I (SC=1)  
 2 II (SC=2)  
 3 III (non-manual) (SC=3)  
 4 III (manual) (SC=4)  
 5 IV (SC=5)  
 6 V (SC=6)  
 7 Armed forces

---

<sup>135</sup> Called [S2EmpSt2] on SPSS file. Derived from [EmployA], [ES2000] and [S2EmpWrk].

<sup>136</sup> Called [S2NSEG] on SPSS file. See also derived variable [S2NSEGGp].

<sup>137</sup> Called [S2NSocCL] on SPSS file.

8           Insufficient information

Q1077    [OpCat] <sup>138</sup> **(NOT ON SCREEN)**  
           NS-SEC operational category [spouse or partner] dv

1           Employers in large organisations

2           Higher managerial occupations

3           Higher professional occupations

4           Lower professional & higher technical occupa

5           Lower managerial occupations

6           Higher supervisory occupations

7           Intermediate occupations

8           Employers in small organisation

9           Own account workers

10          Lower supervisory occupations

11          Lower technical occupations

12          Semi-routine occupations

13          Routine occupations

16          Occup not stated or inadeq described

17          Not classifiable

Q1078    [Class] <sup>139</sup> **(NOT ON SCREEN)**  
           NS-SEC analytic classes [spouse or partner] dv

1           Employers in large org; higer manag & profess

2           Lower profess & manag; higher techn & superv

3           Intermediate occupations

4           Employers in small org; own account workers

5           Lower supervisory & technical occupations

6           Semi-routine occupations

7           Routine occupations

8           Not classified

Q1079    [ClassGp] <sup>140</sup> **(NOT ON SCREEN)**  
           NS-SEC analytic classes[spouse or partner]<grouped> dv

1           Managerial & professional occupa

2           Intermediate occupations

3           Employers in small org; own account workers

4           Lower supervisory & technical occupations

5           Semi-routine & routine occupations

8           Not classifiable

Q1080    [NSSECG] <sup>141</sup>  
           Spouse NS-SEC Socio-economic Class (analytic class level) :dv

1.1          Large employers and higher managerial occupations

1.2          Higher professional occupations

2.0          Lower managerial and professional occupations

3.0          Intermediate occupations

4.0          Small employers and own account workers

5.0          Lower supervisory & technical occupations

6.0          Semi-routine Occupations

7.0          Routine occupations

8.0          Not classified

Q1081    [ISCO] <sup>142</sup> \$ **(NOT ON SCREEN)**  
           Spouse/partner ISCO dv  
           Range: 0 ... 999

---

<sup>138</sup> Called [S2OpCat] on SPSS file. Derived from [S2NSSEC].

<sup>139</sup> Called [S2Class] on SPSS file. Derived from [S2NSSEC].

<sup>140</sup> Called [S2ClassG] on SPSS file. Derived from [S2NSSEC].

<sup>141</sup> Derived from [S2NSSEC]

<sup>142</sup> Derived from SOC2000 for spouse (Q1317)

Q1087 [XSOC2000] \$ **(NOT ON SCREEN)**  
 Standard Occupational Classification - SOC2000 - WITHOUT DOTS.  
 Range: 0 ... 9999  
 99998 (Don't know)  
 99999 (Refusal)

Q1088 [IndexNo] \$ **(NOT ON SCREEN)**  
 Index number of SOC2000 entry selected in coding index  
 Range: 0 ... 999999  
 9999998 (Don't know)  
 9999999 (Refusal)

Q1089 [ES2000] \$ **(NOT ON SCREEN)**  
 Full employment status - derived from Job block questions and SOC2000  
 1 Self-employed : large establishment (25+ employees)  
 2 Self-employed : small establishment (1-24 employees)  
 3 Self-employed : no employees  
 4 Manager : large establishment (25+ employees)  
 5 Manager : small establishment (1-24 employees)  
 6 Foreman or supervisor  
 7 Employee (not elsewhere classified)  
 8 No employment status info given - for use in this program only  
 98 (Don't know)  
 99 (Refusal)

Q1090 [NSSEC]<sup>143</sup> \$ **(NOT ON SCREEN)**  
 NS-SEC Socio-economic Class (full classification)- derived variable  
 Range: 0 ... 17  
 1 Employers in large organisations  
 2 Higher managerial occupation  
 3.1 Higher prof: traditional employees  
 3.2 Higher prof: new employees  
 3.3 Higher prof: traditional self-employed  
 3.4 Higher prof: new'self-employed  
 4.4 Lower prof&higher tech: new self-employed  
 4.1 Lower prof&higher tech: traditional employees  
 4.2 Lower prof&higher tech: new employees  
 4.3 Lower prof&higher tech: traditional self-employed  
 5 Lower managerial occupations  
 6 Higher supervisory occupations  
 7.1 Intermed: clerical and administrative  
 7.2 Intermed: sales and services  
 7.3 Intermed: technical and auxiliary  
 7.4 Intermed: engineering  
 8.1 Small employers: non-professional  
 8.2 Small employers: agriculture  
 9.2 Own account workers: agriculture  
 9.1 Own account workers: non-professional  
 10 Lower supervisory occupations  
 11.2 Lower techn: process operative  
 11.1 Lower techn: craft  
 12.1 Semi-routine: sales  
 12.2 Semi-routine: service  
 12.3 Semi-routine: technical

---

<sup>143</sup> See derived variable [S2NSSECG]

- 12.4 Semi-routine: operative
- 12.5 Semi-routine: agriculture
- 13.2 Routine: production
- 12.6 Semi-routine: clerical
- 13.1 Routine: sales and service
- 13.3 Routine: technical
- 13.4 Routine: operative
- 12.7 Semi-routine: childcare
- 13.5 Routine: agriculture
- 14.1 Never worked
- 14.2 Long-term unemployed
- 15 Full-time students
- 16 Not stated or inadeq described
- 17 Not classifiable for other reason

Q1091 [SECFlag] \$ **(NOT ON SCREEN)**  
Indicator for status of SEC  
0 - valid combination of SEC and ES2000 1 - invalid combination 2 - no  
employment status info - simplified SEC used  
Range: 0 ... 2

Q1092 [SEG] <sup>144</sup> \$ **(NOT ON SCREEN)**  
Socio-economic Group (old scheme)

- 1 Employer - large organisation
- 2 Manager - large organisation
- 3 Employer - small organisation
- 4 Manager - small organisation
- 5 Professional worker - self-employed
- 6 Professional worker - employee
- 7 Intermediate non-manual - ancillary
- 8 Intermediate non-manual - supervisor
- 9 Junior non-manual
- 10 Personal services
- 11 Foreman/supervisor - manual
- 12 Skilled manual
- 13 Semi-skilled manual
- 14 Unskilled manual
- 15 Own account worker (not professional)
- 16 Farmer - employer/manager
- 17 Farmer - own account
- 18 Agricultural worker
- 19 Member of armed forces
- 20 Inadequately described/not stated

Q1093 [SC] <sup>145</sup> \$ **(NOT ON SCREEN)**  
Social Class (old scheme)  
Range: 0 ... 6

- 1 I (SC=1)
- 2 II (SC=2)
- 3 III (non-manual) (SC=3)
- 4 III (manual) (SC=4)
- 5 IV (SC=5)
- 6 V (SC=6)

---

<sup>144</sup> Called [S2SEG] on SPSS file. See derived variable [S2NSEGGp]

<sup>145</sup> Called S2NSocCl on SPSS file.

- 7        Armed forces
- 8        Insufficient information

## Income and benefits

### ASK ALL

Q1096 [AnyBN3]  
CARD M8  
Do you (or your husband/wife/partner) receive any of the **state** benefits or tax credits on this card at present?

1 Yes  
2 No  
8 (Don't know)  
9 (Refusal)

### IF 'yes' AT [AnyBN3]

Q1097- [BenFTNFW] <sup>146</sup> \$  
Q1114 CARD M8 AGAIN  
Which ones? PROBE: Which others?  
Multicoded (Maximum of 18 codes)

|    |                                                                                                        |            |
|----|--------------------------------------------------------------------------------------------------------|------------|
| 1  | State retirement pension (National Insurance)                                                          | [BenefOAP] |
| 2  | War Pension (War Disablement Pension or War Widows Pension)                                            | [BenefWar] |
| 3  | Bereavement Allowance/ Widow's Pension/ Widowed Parent's Allowance                                     | [BenefWid] |
| 4  | Jobseeker's Allowance                                                                                  | [BenefUB]  |
| 5  | Income Support (not for pensioners)                                                                    | [BenefIS2] |
| 6  | Pension Credit / Minimum Income Guarantee / Income Support for pensioners                              | [BenefPC]  |
| 7  | Child Benefit / Guardian's Allowance                                                                   | [BenefCB]  |
| 8  | Child Tax Credit                                                                                       | [BenefCTC] |
| 9  | Working Tax Credit                                                                                     | [BenefFC]  |
| 10 | Housing Benefit (Rent Rebate/ Rent Allowance)                                                          | [BenefHB]  |
| 11 | Council Tax Benefit (or Rebate)                                                                        | [BenefCT]  |
| 12 | Incapacity Benefit / Employment and Support Allowance (formerly Sickness Benefit / Invalidity Benefit) | [BenefInc] |
| 13 | Disability Living Allowance                                                                            | [BenefDLA] |
| 14 | Attendance Allowance (for people aged 65+)                                                             | [BenefAtA] |
| 15 | Severe Disablement Allowance                                                                           | [BenefSev] |
| 16 | Carer's Allowance (formerly Invalid Care Allowance)                                                    | [BenefICA] |
| 17 | Industrial Injuries Benefits                                                                           | [BenefInd] |
| 18 | Other state benefit (WRITE IN)                                                                         | [BenefOth] |
| 98 | (Don't know)                                                                                           |            |
| 99 | (Refusal)                                                                                              |            |

### IF 'other state benefit' AT [BenFTNFW]

Q1115 [othspec] \$  
WRITE IN OTHER ANSWER GIVEN  
Open Question (Maximum of 120 characters)

### ASK ALL:

Q1136 [MainInc4]  
CARD M9  
Which of these is the **main** source of income for you ^Text20 at present?

1 Earnings from employment (own or spouse / partner's)  
2 Occupational pension(s) - from previous employer(s)  
3 Private pension(s)

<sup>146</sup> See derived variables [BenefOAP], [BenefWar], [BenefWid], [BenefUB], [BenefIS2], [BenefPC], [BenefCB], [BenefCTC], [BenefFC], [BenefHB], [BenefCT], [BenefInc], [BenefDLA], [BenefAtA], [BenefSev], [BenefICA], [BenefInd] and [BenefOth].

4 State retirement or widow's pension(s)  
 5 Jobseeker's Allowance/ Unemployment benefit  
 6 Income Support (not for pensioners)  
 7 Pension Credit/ Minimum Income Guarantee/ Income Support for pensioners  
 8 Incapacity or disabled pension or benefit(s) (formerly invalidity or sickness benefit)  
 9 Other state benefit or tax credit (WRITE IN)  
 10 Interest from savings or investments  
 11 Student grant, bursary or loans  
 12 Dependent on parents/other relatives  
 13 Other main source (WRITE IN)  
 98 (Don't know)  
 99 (Refusal)

**IF 'Other state benefit or tax credit' AT [MainInc4]**

Q1137 [othspec] \$  
 WRITE IN OTHER ANSWER GIVEN  
 Open Question (Maximum of 120 characters)

**IF 'Other main source' AT [MainInc4]**

Q1139 [othspec] \$  
 WRITE IN OTHER ANSWER GIVEN  
 Open Question (Maximum of 120 characters)

**ASK ALL**

Q1141 [HHincome] <sup>147</sup> \$  
 CARD M10

<sup>147</sup> The showcard for this question was as follows

### CARD M17

| WEEKLY income<br>BEFORE tax |   |  | MONTHLY income<br>BEFORE tax |   |  | ANNUAL income<br>BEFORE tax |  |  |
|-----------------------------|---|--|------------------------------|---|--|-----------------------------|--|--|
| Less than £140              | Q |  | Less than £590               | Q |  | Less than £7,100            |  |  |
| £141 - 180                  | T |  | £591 - 770                   | T |  | £7,101 - 9,300              |  |  |
| £181 - 210                  | O |  | £771 - 910                   | O |  | £9,301 - 10,900             |  |  |
| £211 - 240                  | K |  | £911 - 1,000                 | K |  | £10,901 - 12,600            |  |  |
| £241 - 270                  | L |  | £1,001 - 1,200               | L |  | £12,601 - 14,300            |  |  |
| £271 - 310                  | B |  | £1,201 - 1,300               | B |  | £14,301 - 16,200            |  |  |
| £311 - 350                  | Z |  | £1,301 - 1,500               | Z |  | £16,201 - 18,300            |  |  |
| £351 - 400                  | M |  | £1,501 - 1,700               | M |  | £18,301 - 20,600            |  |  |
| £401 - 440                  | F |  | £1,701 - 1,900               | F |  | £20,601 - 23,000            |  |  |
| £441 - 500                  | J |  | £1,901 - 2,200               | J |  | £23,001 - 26,000            |  |  |
| £501 - 560                  | D |  | £2,201 - 2,400               | D |  | £26,001 - 29,000            |  |  |
| £561 - 620                  | H |  | £2,401 - 2,700               | H |  | £29,001 - 32,100            |  |  |
| £621 - 680                  | A |  | £2,701 - 3,000               | A |  | £32,101 - 35,700            |  |  |
| £681 - 760                  | W |  | £3,001 - 3,300               | W |  | £35,701 - 39,600            |  |  |
| £761 - 850                  | G |  | £3,301 - 3,700               | G |  | £39,601 - 44,200            |  |  |
| £851 - 960                  | N |  | £3,701 - 4,200               | N |  | £44,201 - 49,900            |  |  |
| £961 - 1,100                | X |  | £4,201 - 4,800               | X |  | £49,901 - 57,200            |  |  |
| £1,101 - 1,300              | C |  | £4,801 - 5,600               | C |  | £57,201 - 67,200            |  |  |
| £1,301 - 1,700              | P |  | £5,601 - 7,200               | P |  | £67,201 - 86,600            |  |  |
| £1,701 or more              | E |  | £7,201 or more               | E |  | £86,601 or more             |  |  |

Which of the letters on this card represents the total income of your household from **all** sources **before tax**?

Please just tell me the letter.

NOTE: INCLUDES INCOME FROM BENEFITS, SAVINGS, ETC.

- 1 Q
- 2 T
- 3 O
- 4 K
- 5 L
- 6 B
- 7 Z
- 8 M
- 9 F
- 10 J
- 11 D
- 12 H
- 13 A
- 14 W
- 15 G
- 16 N
- 17 X
- 18 C
- 19 P
- 20 E
- 97 Refused information
- 98 (Don't know)

Q1142 [HHIncD]  
Household income deciles (dv)

- 1 Less than £770 p.m.
- 2 £771 - 1,000 p.m.
- 3 £1,001 - 1,300 p.m.
- 4 £1,301 - 1,700 p.m.
- 5 £1,701 - 2,200 p.m.
- 6 £2,201 - 2,700 p.m.
- 7 £2,701 - 3,300 p.m.
- 8 £3,301 - 4,200 p.m.
- 9 £4,201 - 5,600 p.m.
- 10 £5,601 or more p.m.
- 97 Refused information
- 98 (Don't know)

Q1143 [HHIncQ]  
Household income quartiles (dv)

- 1 Less than £1,200 p.m.
- 2 £1,201 - 2,200 p.m.
- 3 £2,201 - 3,700 p.m.
- 4 £3,701 or more p.m.
- 97 Refused information
- 98 (Don't know)

**ASK THOSE IN PAID WORK (AT [REconAct])**

Q1144 [REarn]<sup>148</sup> \$

CARD M11

Which of the letters on this card represents your **own** gross or total **earnings**, before deduction of income tax and national insurance?

- 1 Q
- 2 T
- 3 O
- 4 K
- 5 L
- 6 B
- 7 Z
- 8 M
- 9 F
- 10 J
- 11 D
- 12 H
- 13 A
- 14 W
- 15 G
- 16 N
- 17 X
- 18 C
- 19 P
- 20 E
- 97 Refused information
- 98 (Don't know)
- 99 (Refusal)

<sup>148</sup> The showcard for this question was as follows

**CARD M18**

| <b>WEEKLY earnings<br/>BEFORE tax</b> |          | <b>MONTHLY earnings<br/>BEFORE tax</b> |          | <b>ANNUAL earnings<br/>BEFORE tax</b> |
|---------------------------------------|----------|----------------------------------------|----------|---------------------------------------|
| Less than £63                         | <b>Q</b> | Less than £270                         | <b>Q</b> | Less than £3,270                      |
| £64 - 100                             | <b>T</b> | £271 - 430                             | <b>T</b> | £3,271 - 5,210                        |
| £101 - 140                            | <b>O</b> | £431 - 590                             | <b>O</b> | £5,211 - 7,130                        |
| £141 - 180                            | <b>K</b> | £591 - 780                             | <b>K</b> | £7,131 - 9,350                        |
| £181 - 210                            | <b>L</b> | £781 - 930                             | <b>L</b> | £9,351 - 11,200                       |
| £211 - 240                            | <b>B</b> | £931 - 1,100                           | <b>B</b> | £11,201 - 12,700                      |
| £241 - 270                            | <b>Z</b> | £1,101 - 1,200                         | <b>Z</b> | £12,701 - 14,200                      |
| £271 - 300                            | <b>M</b> | £1,201 - 1,300                         | <b>M</b> | £14,201 - 15,600                      |
| £301 - 330                            | <b>F</b> | £1,301 - 1,400                         | <b>F</b> | £15,601 - 17,000                      |
| £331 - 360                            | <b>J</b> | £1,401 - 1,600                         | <b>J</b> | £17,001 - 18,600                      |
| £361 - 390                            | <b>D</b> | £1,601 - 1,700                         | <b>D</b> | £18,601 - 20,400                      |
| £391 - 420                            | <b>H</b> | £1,701 - 1,800                         | <b>H</b> | £20,401 - 22,100                      |
| £421 - 460                            | <b>A</b> | £1,801 - 2,000                         | <b>A</b> | £22,101 - 24,100                      |
| £461 - 510                            | <b>W</b> | £2,001 - 2,200                         | <b>W</b> | £24,101 - 26,500                      |
| £511 - 560                            | <b>G</b> | £2,201 - 2,500                         | <b>G</b> | £26,501 - 29,400                      |
| £561 - 630                            | <b>N</b> | £2,501 - 2,700                         | <b>N</b> | £29,401 - 32,600                      |
| £631 - 710                            | <b>X</b> | £2,701 - 3,100                         | <b>X</b> | £32,601 - 36,900                      |
| £711 - 830                            | <b>C</b> | £3,101 - 3,600                         | <b>C</b> | £36,901 - 43,200                      |
| £831 - 1,100                          | <b>P</b> | £3,601 - 4,900                         | <b>P</b> | £43,201 - 58,500                      |
| £1,101 or more                        | <b>E</b> | £4,901 or more                         | <b>E</b> | £58,501 or more                       |

Q1145 [REarnD]  
Respondent earnings deciles (dv)

|    |                     |
|----|---------------------|
| 1  | Less than £430 p.m. |
| 2  | £431 - 780 p.m.     |
| 3  | £781 - 1,100 p.m.   |
| 4  | £1,101 - 1,300 p.m. |
| 5  | £1,301 - 1,600 p.m. |
| 6  | £1,601 - 1,800 p.m. |
| 7  | £1,801 - 2,200 p.m. |
| 8  | £2,201 - 2,700 p.m. |
| 9  | £2,701 - 3,600 p.m. |
| 10 | £3,601 or more p.m. |
| 97 | Refused information |
| 98 | (Don't know)        |
| 99 | (Refusal)           |

Q1146 [REarnQ]  
Respondent earnings quartiles (dv)

|    |                     |
|----|---------------------|
| 1  | Less than £930 p.m. |
| 2  | £931 - 1,600 p.m.   |
| 3  | £1,601 - 2,500 p.m. |
| 4  | £2,501 or more p.m. |
| 97 | Refused information |
| 98 | (Don't know)        |
| 99 | (Refusal)           |

## End bit

### ASK ALL

Q1149 [BTime] \$ **(NOT ON SCREEN)**  
Start time of BEndit block  
Range: 0 ... 1440

Q1150 [SCXInct] \$  
The final set of questions are in this booklet. They will probably be easier to answer if you read them. All of them can be answered just by ticking a box.  
(IF APPROPRIATE: You don't necessarily have to do them right now. I can call back for the booklet another day).  
1 Press 1 and <Enter> to continue.  
8 (Don't know)  
9 (Refusal)

Q1151 [SCXplain]  
PLEASE MAKE SURE YOU GIVE THE RESPONDENT THE VERSION (A/B/C)  
**(yellow/pink/blue)** QUESTIONNAIRE  
ENTER THE SERIAL NUMBER : *(serial number)* *(check letter)*  
...POINT NUMBER : *(sample point)*  
...INTERVIEWER NUMBER : *(interviewer number)*  
ON THE FRONT PAGE OF THE SELF COMPLETION.  
THEN TELL US WHETHER IT IS TO BE ...  
1 ... filled in immediately after interview in your presence,  
2 or, left behind to be filled in later,  
3 or, if the respondent refused.  
8 (Don't know)  
9 (Refusal)

Q1152 [SelfComp] **(NOT ON SCREEN)**  
Is there a self-completion questionnaire? dv  
51 no self completion  
61 yes  
98 (Don't know)  
99 (Refusal)

Q1153 [PhoneX] \$  
Do you have a telephone?  
1 Yes  
2 No  
8 (Don't know)  
9 (Refusal)

### IF 'yes' AT [PhoneX]

Q1154 [PhoneBc2] \$  
A few interviews on any survey are checked by my office to make sure that people are satisfied with the way the interview was carried out. In case my office needs to contact you, it would be helpful if we could have your telephone number.  
ADD IF NECESSARY: Your 'phone number will **not** be passed to anyone outside the National Centre without your consent.  
IF NUMBER GIVEN, ENTER AT NEXT SCREEN  
IF MORE THAN ONE NUMBER, ASK WHICH WOULD BE MOST CONVENIENT FOR RECONTACT  
1 Number given  
2 Number refused  
8 (Don't know)

9 (Refusal)

**IF 'Number given' AT [PhoneBc2]**

Q1155 [AskPhone] \$  
 ENTER FIRST TELEPHONE NUMBER  
 INCLUDE STANDARD CODE  
 IF NOT OBTAINED, ENTER <CTRL+K>  
 Open Question (Maximum of 15 characters)

**IF NOT Refused AT [PhoneX] OR [PhoneBc2]**

Q1156 [PhoneX2] \$  
 (And, may we have your mobile phone number as well?@/IF NO MOBILE:) Is  
 there another phone number where you could (also) be reached?  
 IF NUMBER GIVEN, ENTER AT NEXT SCREEN

1 Number given  
 2 Number refused/not given (/no mobile or second phone)  
 8 (Don't know)  
 9 (Refusal)

**IF 'Number given' AT [PhoneX2]**

Q1157 [AskPhon2] \$  
 ENTER SECOND TELEPHONE NUMBER  
 INCLUDE STANDARD CODE  
 IF NOT OBTAINED, ENTER <CTRL+K>  
 Open Question (Maximum of 15 characters)

**ASK ALL**

Q1159 [ComeBac3] \$  
 From time to time we do follow-up studies and may wish to contact you  
 again. Would this be all right?

1 Yes  
 2 No  
 8 (Don't know)  
 9 (Refusal)

Q1160 [THANK] \$  
 INTERVIEWER: THE INTERVIEW IS FINISHED  
 THANK THE RESPONDENT FOR THEIR CO-OPERATION  
 THEN ENTER '1' TO CLOSE THE INTERVIEW

1 FINISH

Q1161 [EndTIM]  
 End time  
 Time

Q1162 [DurationX] <sup>149</sup>  
 INTERVIEWER: THE COMPUTER THINKS THIS INTERVIEW STARTED AT (*start time*)  
 AND FINISHED AT (*end time*) - (*time*) MINUTES  
 PLEASE ENTER LENGTH OF INTERVIEW IN MINUTES  
 Range: 1 ... 300

998 (Don't know)  
 999 (Refusal)

Q1163 [SIntLen] \$  
 Computer Interview Length  
 Range: 1 ... 997

998 (Don't know)  
 999 (Refusal)

---

<sup>149</sup> Called [Duration] on SPSS file

Q1164 [RespOutc]  
Final outcome code if productive  
111 Full productive, sc to interviewer  
112 Full productive, no sc  
113 Full productive, sc sent by respondent  
211 Partial productive, sc to interviewer  
212 Partial productive, no sc  
213 Partial productive, sc sent by respondent

## Admin block

Q1166 [Serial\_Num] \$  
Serial Number  
Range: 220001 ... 999997

Q1167 [Issue\_Num] \$  
Issue.  
Range: 0 ... 7

Q1168 [INT\_NUM] \$  
Interviewer Number  
Open Question (Maximum of 4 characters)

Q1169 [AIntDate] \$  
Interview date  
Date

Q1170 [ADuration] \$  
Interview length  
Range: 0 ... 9997

Q1171 [QStart] \$  
Qre started  
1 Yes  
2 No  
8 (Don't know)  
9 (Refusal)

Q1172 [QPart] \$  
Qre partial  
1 Yes  
2 No  
8 (Don't know)  
9 (Refusal)

Q1173 [QEnd] \$  
Qre finished  
1 Yes  
2 No  
8 (Don't know)  
9 (Refusal)

Q1174 [AVersion] \$  
Qre version  
Range: 1 ... 97  
98 (Don't know)  
99 (Refusal)

Q1175 [CAdd1] \$ **(NOT ON SCREEN)**  
Confirmed address line 1  
Open Question (Maximum of 40 characters)

Q1176 [CAdd2] \$ **(NOT ON SCREEN)**  
Confirmed address line 2  
Open Question (Maximum of 40 characters)

Q1177 [CAdd3] \$ **(NOT ON SCREEN)**  
Confirmed address line 3

Open Question (Maximum of 40 characters)

Q1178 [CAdd4] \$ **(NOT ON SCREEN)**  
Confirmed address line 4  
Open Question (Maximum of 40 characters)

Q1179 [CAdd5] \$ **(NOT ON SCREEN)**  
Confirmed address line 5  
Open Question (Maximum of 40 characters)

Q1180 [CAddPC] \$ **(NOT ON SCREEN)**  
Confirmed postcode  
Open Question (Maximum of 10 characters)

Q1181 [CRTt1] \$ **(NOT ON SCREEN)**  
Confirmed respondent's title  
Open Question (Maximum of 15 characters)

Q1182 [CRFNam] \$ **(NOT ON SCREEN)**  
Confirmed respondent's forename  
Open Question (Maximum of 20 characters)

Q1183 [CRSNam] \$ **(NOT ON SCREEN)**  
Confirmed respondent's surname  
Open Question (Maximum of 20 characters)

Q1184 [PhoneNum] \$ **(NOT ON SCREEN)**  
Confirmed telephone number 1  
Open Question (Maximum of 15 characters)

Q1185 [PhoneNu2] \$ **(NOT ON SCREEN)**  
Confirmed telephone number 2  
Open Question (Maximum of 15 characters)

Q1186 [RFNamX] \$ **(NOT ON SCREEN)**  
Kept version of RFNam, used in selection checks  
Open Question (Maximum of 20 characters)

Q1187 [ACountry] \$ **(NOT ON SCREEN)**  
Copy of country  
1 England  
2 Scotland  
3 Wales

Q1188 [ASex] \$ **(NOT ON SCREEN)**  
Respondent sex from respsex  
1 Male  
2 Female

Q1189 [AAge] \$ **(NOT ON SCREEN)**  
Respondent age from respage  
Range: 0 ... 97  
98 (Don't know)  
99 (Refusal)

Q1190 [HSTATUS] \$  
Current Interview Status  
UPDATE THIS BEFORE EACH TRANSMISSION TO HEAD OFFICE.  
0 No work done yet  
1 Calls made but no contact  
2 Contact made, no work yet done on questionnaire

3 Interview started/Any interviewing done  
4 Other - no interviewing required (eg. ineligible, refusal)

Q1191 [MENUNOTE] \$

Reminder/Note for the opening menu (OPTIONAL)

IF NOTHING TO SAY, JUST PRESS <Enter>.  
ENTER IN HERE ANY USEFUL DETAILS YOU WISH TO APPEAR ON THE ADDRESS MENU>  
Open Question (Maximum of 50 characters)

Q1192 [VCHOICE] \$  
Protects Choice

1 RETURN TO THE ADDRESS MENU - without completing the admin block  
5 COMPLETE ADMIN DETAILS - and prepare for return to Head Office.

INTERVIEWER: Do not select code 5 until you are sure you wish to send  
this questionnaire to Head Office

8 (Don't know)  
9 (Refusal)

Q1193 [SCStatus] \$  
PLEASE CODE THE CURRENT STATUS OF THE SELF-COMPLETION QUESTIONNAIRE:

1 S/C collected, and ready to return  
2 Planning to collect S/C from respondent - TEMPORARY CODE  
3 Envelope left for respondent to post S/C to office  
4 S/C not expected (e.g. refused)

Q1194 [SCNExp] \$

WRITE IN REASON NOT EXPECTED  
Open Question (Maximum of 120 characters)

Q1195 [Outcome] \$  
INTERVIEWER : FINAL OUTCOME CODE

IF PRODUCTIVE (FULLY OR PARTIALLY): PRESS ENTER

IF UNPRODUCTIVE: ENTER FINAL OUTCOME CODE FROM ARF

NOTE :  
612 = Issued not attempted / Reallocated to another interviewer  
Range: 0 ... 997

998 (Don't know)  
999 (Refusal)

Q1196- [ReasRef] \$  
Q1209 CODE REASON FOR REFUSAL  
CODE ALL THAT APPLY  
IF NO REASON GIVEN, CODE <CTRL+K>  
Multicoded (Maximum of 14 codes)

1 Never takes part in surveys  
2 Dislikes/not willing to help government (or other survey funder)  
3 Inconvenient time - about to move house, go away, etc.  
4 Not prepared to give (so much) time/ can't be bothered  
5 Genuinely too busy - i.e. not an excuse  
6 Waste of money, money could be better used  
7 Invasion of privacy  
8 Security concerns - nervous/fearful of strangers  
9 Confidentiality concerns  
10 Not qualified/able to give opinions

11 Does not consider survey relevant as not permanent resident/British citizen  
 12 Subject of no interest/ boring/ not relevant  
 13 Put off by advance letter, other survey documents  
 97 Other reason  
 98 (Don't know)  
 99 (Refusal)

Q1210- [Fee] \$  
 Q1221 VISIBLE IN TEST VERSION ONLY  
 Range: 0 ... 7  
 8 (Don't know)  
 9 (Refusal)

Q1222- [Barriers] \$  
 Q1225 INTERVIEWER:Are any of these physical barriers to entry present at the house/flat/building? (A.2 on ARF)  
 CODE ALL THAT APPLY.  
 Multicoded (Maximum of 4 codes)  
 1 Locked common entrance  
 2 Locked gates  
 3 Security staff or other gatekeeper  
 4 Entry phone access  
 5 None of these  
 8 Unable to obtain information

Q1226 [DwellTyp] \$  
 INTERVIEWER:Which of these best describes the selected flat or house (i.e. the selected dwelling unit) of the intended respondent? (A.3 on ARF)  
 1 Detached house  
 2 Semi-detached house  
 3 Terraced house (including end of terrace)  
 4 Flat or maisonette - purpose built  
 5 Flat or maisonnette - conversion  
 6 Other  
 8 Unable to obtain information

Q1227 [CondArea] \$  
 Which of these best describes the condition of residential properties in the area? (A.4 on ARF)  
 1 Mainly good  
 2 Mainly fair  
 3 Mainly bad  
 4 Mainly very bad  
 8 Unable to obtain information

Q1228 [CondAdd] \$  
 How is the external condition of the selected flat or house (i.e. the selected dwelling unit) relative to other residential properties in the area? (A.5 on ARF)  
 1 Better  
 2 About the same  
 3 Worse  
 8 Unable to obtain information

Q1229 [AddOk] \$  
 WAS THE ADDRESS ON THE ARF LABEL CORRECT AND COMPLETE?  
 1 Yes  
 2 No  
 8 (Don't know)

9 (Refusal)

Q1230 [AAdd1] \$  
PLEASE ENTER CORRECT ADDRESS

FIRST LINE...  
Open Question (Maximum of 40 characters)

Q1231 [AAdd2] \$  
(PLEASE ENTER CORRECT ADDRESS)

SECOND LINE...  
Open Question (Maximum of 40 characters)

Q1232 [AAdd3] \$  
(PLEASE ENTER CORRECT ADDRESS)

THIRD LINE...  
(JUST PRESS ENTER IF NO MORE TO ADD)  
Open Question (Maximum of 40 characters)

Q1233 [AAdd4] \$  
(PLEASE ENTER CORRECT ADDRESS)

FOURTH LINE...  
(JUST PRESS ENTER IF NO MORE TO ADD)  
Open Question (Maximum of 40 characters)

Q1234 [AAdd5] \$  
(PLEASE ENTER CORRECT ADDRESS)

FIFTH LINE...  
(JUST PRESS ENTER IF NO MORE TO ADD)  
Open Question (Maximum of 40 characters)

Q1235 [AAddPC] \$  
(PLEASE ENTER CORRECT ADDRESS)

POSTCODE...  
Open Question (Maximum of 10 characters)

Q1236 [ConAdd] \$  
PLEASE READ THE ADDRESS BELOW, AND CONFIRM IT IS CORRECT AND MATCHES  
CORRECTIONS MADE ON THE ARF  
Address: ^AAdd1  
^AAdd2  
^AAdd3  
^AAdd4  
^AAdd5  
POSTCODE:^AAddPc  
GO BACK AND CHANGE IF NOT CORRECT.

1 Address correct  
2 Address **not** correct

Q1237 [RTt1] \$  
INTERVIEWER: PLEASE ENTER THE SELECTED PERSON'S NAME...

... TITLE:

IF 'DON'T KNOW', ENTER <CTRL+K>  
Open Question (Maximum of 15 characters)

Q1238 [RFNam] \$  
INTERVIEWER: PLEASE ENTER THE SELECTED PERSON'S NAME...  
  
... FIRST NAME / INITIALS:  
  
IF 'DON'T KNOW', ENTER <CTRL+K>  
Open Question (Maximum of 20 characters)

Q1239 [RSNam] \$  
INTERVIEWER: PLEASE ENTER THE SELECTED PERSON'S NAME...  
  
... SURNAME:  
  
IF 'DON'T KNOW', ENTER <CTRL+K>  
Open Question (Maximum of 20 characters)

Q1240 [ConName] \$  
INTERVIEWER: The selected person's name is:  
  
^text100  
  
IS THIS CORRECT?  
  
GO BACK AND CHANGE IF NOT CORRECT

1 Name correct  
2 Name **NOT** correct

Q1241 [AskPhone] \$  
ENTER FIRST TELEPHONE NUMBER FROM FRONT OF ARF  
  
INCLUDE STANDARD CODE  
  
IF NOT OBTAINED, ENTER <CTRL+K>  
Open Question (Maximum of 15 characters)

Q1242 [AskPhon2] \$  
ENTER SECOND TELEPHONE NUMBER FROM FRONT OF ARF  
  
INCLUDE STANDARD CODE  
  
IF NOT OBTAINED, ENTER <CTRL+K>  
Open Question (Maximum of 15 characters)

Q1243 [ConPhone] \$  
INTERVIEWER: The telephone number(s) are:  
  
1: ^Text15  
2: ^Text15b  
  
IS THIS CORRECT?  
  
GO BACK AND CHANGE IF NOT CORRECT

1 Correct  
2 **NOT** correct

Q1244 [DUNo] \$  
RECORD NUMBER OF DWELLING UNITS  
  
(B1 on the ARF)

(IF NUMBER OF DWELLING UNITS NOT KNOWN, OR DU SELECTION NOT DONE, CODE  
<CTRL+K>  
Range: 1 ... 97  
98 (Don't know)  
99 (Refusal)

Q1245 [DUSel] \$  
RECORD NUMBER OF SELECTED DWELLING UNIT  
  
(B3 on the ARF)  
Range: 1 ... 97  
98 (Don't know)  
99 (Refusal)

Q1246 [PersNo] \$  
ENTER NUMBER OF PEOPLE AGED 18+  
  
(C1 on the ARF)  
Range: 1 ... 97

Q1247 [PersSel] \$  
ENTER PERSON NUMBER OF SELECTED PERSON  
  
(C2 on the ARF)  
Range: 1 ... 97

Q1248 [TotAdult] \$  
TOTAL ADULTS FROM HOUSEHOLD GRID - IMPUTED  
Range: 0 ... 15

Q1249- [Adult] \$  
Q1260 NAMES OF ADULTS IN HOUSEHOLD IN GRID ORDER  
Open Question (Maximum of 10 characters)

Q1261- [SAdult] \$  
Q1272 NAMES OF ADULTS IN HOUSEHOLD IN ALPHABETICAL ORDER  
Open Question (Maximum of 10 characters)

Q1273- [Sorted] \$  
Q1284 ARRAY OF SORTED POSITION OF EACH ADULT NAME  
Range: 1 ... 12  
98 (Don't know)  
99 (Refusal)

Q1285 [SampSel] \$  
SELECTION CODE IMPUTED FROM PersNo AND Init.ISel  
Open Question (Maximum of 1 characters)  
8 (Don't know)  
9 (Refusal)

Q1286 [SampCode] \$  
PERSON CODE IMPUTED FROM SampSel  
Range: 1 ... 12  
98 (Don't know)  
99 (Refusal)

Q1287 [DispRes] \$  
Adults in household grid (in alphabetical order):  
01:^SAdult[1] 02:^SAdult[2] 03:^SAdult[3] 04:^SAdult[4] 05:^SAdult[5]  
06:^SAdult[6] 07:^SAdult[7] 08:^SAdult[8] 09:^SAdult[9] 10:^SAdult[10]  
11:^SAdult[11] 12:^SAdult[12]

Selection code (from ARF label): ^SampCode

Selected adult should be ^SAdult[SampCode] but person interviewed was  
^HHold.RespName

PLEASE EXPLAIN THE DISCREPANCY

Open Question (Maximum of 120 characters)

Q1288 [ARFNm] \$

INTERVIEWER: Please key the name / initial of each person aged 18+ in  
the (selected) DU  
exactly as they appear at **C2 on the ARF**

Person code ^idx :

Open Question (Maximum of 10 characters)

Q1289- [ARFNm] \$

Q1299 INTERVIEWER: Please key the name / initial of each person aged 18+ in  
the (selected) DU  
exactly as they appear at **C2 on the ARF**

Person code ^idx :

Open Question (Maximum of 10 characters)

Q1300 [SARFNm] \$

ARF Names - sorted into alphabetical order  
Open Question (Maximum of 10 characters)

Q1312- [ASrted] \$

Q1323 ARF names - ARRAY OF SORTED POSITION OF EACH ADULT NAME

Range: 1 ... 12

98 (Don't know)

99 (Refusal)

Q1324 [ASmpSel] \$

ARF names - SELECTION CODE IMPUTED FROM PersNo AND Init.ISel  
Open Question (Maximum of 1 characters)

8 (Don't know)

9 (Refusal)

Q1325 [ASmpCode] \$

PERSON CODE IMPUTED FROM ASmpSel  
Range: 1 ... 12

98 (Don't know)

99 (Refusal)

Q1326 [DispResB] \$

Adults in selection grid from ARF (in alphabetical order):

01:^SArfNm[1] 02:^SArfNm[2] 03:^SArfNm[3] 04:^SArfNm[4] 05:^SArfNm[5]

06:^SArfNm[6] 07:^SArfNm[7] 08:^SArfNm[8] 09:^SArfNm[9] 10:^SArfNm[10]

11:^SArfNm[11] 12:^SArfNm[12]

Selection code (from ARF label): ^ASmpCode

Selected adult should be ^SArfNm[ASmpCode] but person interviewed was  
^HHold.HHGrid.Person[1].Name

PLEASE EXPLAIN THE DISCREPANCY

NOTE: THE COMPUTER WILL FLAG ANYTHING THAT DOESN'T MATCH EXACTLY. IF  
'^sarfnm[asmpcode]' IS '^hhold.hhgrid.person[1].name', PLEASE ENTER  
'Same person'.

Open Question (Maximum of 120 characters)

Q1327 [DispResU] \$

Adults in selection grid from ARF (in alphabetical order):

01:^SArfNm[1] 02:^SArfNm[2] 03:^SArfNm[3] 04:^SArfNm[4] 05:^SArfNm[5]  
06:^SArfNm[6] 07:^SArfNm[7] 08:^SArfNm[8] 09:^SArfNm[9] 10:^SArfNm[10]  
11:^SArfNm[11] 12:^SArfNm[12]

Selection code (from ARF label): ^ASmpCode

Selected adult should be ^SArfNm[ASmpCode] but name recorded in admin  
block was ^RFNamX.

PLEASE EXPLAIN THE DISCREPANCY

NOTE: THE COMPUTER WILL FLAG ANYTHING THAT DOESN'T MATCH EXACTLY. IF  
'^sarfnm[asmpcode]' IS '^RFNamX', PLEASE ENTER 'Same person'.

Open Question (Maximum of 120 characters)

Q1328 [NotAlph] \$

ARF names - if not entered in alphabetical order

1 Problem - not entered in order

2 No problem

8 (Don't know)

9 (Refusal)

Q1329 [DispResC] \$

INTERVIEWER:

The number of adults in the **household grid** is ^totadult.

The number of adults given at **Persno** (from C1 on the ARF) is ^persno.

PLEASE EXPLAIN THE DISCREPANCY

Open Question (Maximum of 120 characters)

Q1330 [SRF] \$

INTERVIEWER:Has a Special Report Form (SRF) been filed for this address  
/ serial number / case  
or are you intending to do so?

A Special Report Form should be filed without delay if you think there  
is a risk  
to interviewer safety at this address.

This question must **only** be answered Yes if an SRF has been sent or will  
be sent promptly.

1 Yes, report already filed

2 Yes, not yet filed but intending to

3 No, not intending to file report

Q1331 [AdInf] \$

INTERVIEWER:Please enter any information which may be useful at  
recontact.

This may be at quality control (recall), reissue or follow-up interview.

Please include any information you have recorded at E2 on the ARF.

(Enter the information here - not in a memo (remark).)

If no info, press <Enter> to leave empty.

Open Question (Maximum of 250 characters)

Q1332 [S1Act] \$  
INTERVIEWER: Is any special action required **on receipt in the office** for  
this address / serial  
number / case, e.g. to make a correction to the information collected  
that you are  
unable to make yourself for some reason?

1 Yes

2 No

Q1333 [S2Act] \$  
INTERVIEWER: Please enter details of the special action required.

Enter the information here - not in a memo (remark).

Open Question (Maximum of 250 characters)

Q1335 [SupFlag] \$  
INTERVIEWER: Was a supervisor present for all or part of this interview?

1 Yes - present for all or part

2 No - not present

Q1336 [IntDone] \$  
HAVE YOU COMPLETED ALL POST-INTERVIEWING CODING, CHECKING AND NOTES?

CODE 1 (Yes) SIGNALS THAT THIS INTERVIEW IS READY FOR RETURN OF WORK TO  
HEAD OFFICE

1 Yes, completed all coding etc.

2 Not yet

Q1337 [EdDone] \$  
HAVE YOU COMPLETED ALL EDITING AND CODING.

1 Yes, completed all editing.

2 Not yet

Q1338 [EdINFO] \$  
EDITOR: THAT COMPLETES THE EDIT

USE THE F7 FUNCTION KEY TO EDIT THE NEXT SERIAL NUMBER

USE <CTRL+F7> TO BRING UP THE BROWSER MENU

USE <Alt+X> TO FINISH EDITING

1 Exit

8 (Don't know)

9 (Refusal)

Q1340 [SANResp] \$  
INTERVIEWER: Enter the total number of persons interviewed at this serial  
number.

If no one was interviewed, enter 0.

Range: 0 ... 99

Q1341 [SANNResp] \$  
INTERVIEWER: Enter the total number of persons selected **but not**  
interviewed at this serial number.

If no one was selected but not interviewed, enter 0.  
Range: 0 ... 99

Q1342 [SARNTtl] \$  
INTERVIEWER:Code the **title** of the ^order[PSeq] person interviewed or  
selected for interview  
but not interviewed.

If the title is not known or no contact made, press <Ctrl K>.

- 1 Mr
- 2 Mrs
- 3 Ms
- 4 Miss
- 5 Other title
- 8 (Don't know)
- 9 (Refusal)

Q1343 [SARNTxt] \$  
INTERVIEWER:Enter the **title** of the ^order[PSeq] person interviewed or  
selected for interview  
but not interviewed.  
Open Question (Maximum of 15 characters)

Q1344 [SARNFor] \$  
INTERVIEWER:Enter the **first name** of the ^order[PSeq] person interviewed  
or selected for interview  
but not interviewed.

If the first name is not known or no contact made, press <Ctrl K>.  
Open Question (Maximum of 20 characters)

Q1345 [SARNSur] \$  
INTERVIEWER:Enter the **surname** of the ^order[PSeq] person interviewed or  
selected for interview  
but not interviewed.

If the surname is not known or no contact made, press <Ctrl K>.  
Open Question (Maximum of 20 characters)

Q1346 [SARInt] \$  
INTERVIEWER:Was ^SARNTxt ^SARNFor ^SARNSur interviewed?

- 1 Yes
- 2 No
- 8 (Don't know)
- 9 (Refusal)

Q1362 [SACNWho] \$  
INTERVIEWER:Who is the main contact person for this serial number?

If the name details are already collected, enter the code below.

Else code 5 for ''Someone else'' and enter the details at the following  
questions.

- 1 ^Person[1]
- 2 ^Person[2]
- 3 ^Person[3]
- 4 ^Person[4]
- 5 Someone else

Q1363 [SACNTtl] \$  
INTERVIEWER:Code the **title** of the main contact person.

If the title is not known or no contact made, press <Ctrl K>.

1 Mr  
2 Mrs  
3 Ms  
4 Miss  
5 Other title  
8 (Don't know)  
9 (Refusal)

Q1364 [SACNTxt] \$  
INTERVIEWER:Enter the **title** of the main contact person.  
Open Question (Maximum of 15 characters)

Q1365 [SACNFor]  
INTERVIEWER:Enter the **first name** of the main contact person.

If the first name is not known or no contact made, press <Ctrl K>.  
Open Question (Maximum of 20 characters)

Q1366 [SACNSur] \$  
INTERVIEWER:Enter the **surname** of the main contact person.

If the surname is not known or no contact made, press <Ctrl K>.  
Open Question (Maximum of 20 characters)

Q1367 [SA1Tel] \$  
INTERVIEWER:Enter the main telephone number.

Include standard code.

If not obtained, press <Ctrl K>.  
Open Question (Maximum of 15 characters)

Q1368 [SA2Tel] \$  
INTERVIEWER:Enter the alternative telephone number.

Include standard code.

If not obtained, press <Ctrl K>.  
Open Question (Maximum of 15 characters)

Q1369 [SA1RNC] \$  
INTERVIEWER:Is there any reason why this address should **not** be recontacted?

1 Yes  
2 No

Q1370 [SA2RNC] \$  
INTERVIEWER:Explain fully why this address should **not** be recontacted.  
Open Question (Maximum of 100 characters)

Q1371 [SASRF] \$  
INTERVIEWER:Has a Special Report Form (SRF) been filed for this address / serial number / case or are you intending to do so?

A Special Report Form should be filed without delay if you think there is a risk to interviewer safety at this address.

This question must **only** be answered Yes if an SRF has been sent or will be sent promptly.

- 1 Yes, report already filed
- 2 Yes, not yet filed but intending to
- 3 No, not intending to file report

Q1372 [SAAdInf] \$  
INTERVIEWER: Please enter any information which may be useful at recontact.

This may be at quality control (recall), reissue or follow-up interview.

Ensure that any important points you have noted on the ARF are entered here.

(Enter the information here - not in a memo (remark).)

If no info, press <Enter> to leave empty.  
Open Question (Maximum of 250 characters)

Q1373 [SAS1Act] \$  
INTERVIEWER: Is any special action required **on receipt in the office** for this address / serial number / case, e.g. to make a correction to the information collected that you are unable to make yourself for some reason?

- 1 Yes
- 2 No

Q1374 [SAS2Act] \$  
INTERVIEWER: Please enter details of the special action required.

Enter the information here - not in a memo (remark).  
Open Question (Maximum of 250 characters)

Q1375- [SABarr] \$

Q1378 INTERVIEWER: Are any of these physical barriers to entry present at the house/flat/building?

CODE ALL THAT APPLY.

Multicoded (Maximum of 4 codes)

- 1 Locked common entrance
- 2 Locked gates
- 3 Security staff or other gatekeeper
- 4 Entry phone access
- 5 None of these
- 8 Unable to obtain information
- 99 (Refusal)

Q1379 [SALEnt] \$  
Locked common entrance

- 0 No
- 1 Yes
- 8 (Don't know)
- 9 (Refusal)

Q1380 [SALGat] \$  
Locked gates

- 0 No
- 1 Yes
- 8 (Don't know)

9 (Refusal)

Q1381 [SAGatek] \$  
Security staff or other gatekeeper

0 No

1 Yes

8 (Don't know)

9 (Refusal)

Q1382 [SAEPhon] \$  
Entry phone access

0 No

1 Yes

8 (Don't know)

9 (Refusal)

Q1383 [SADType] \$  
INTERVIEWER: Which of these best describes the selected flat or house  
(i.e. the selected dwelling unit) of the intended respondent?

1 Detached house

2 Semi-detached house

3 Terraced house (including end of terrace)

4 Flat or maisonette - purpose built

5 Flat or maisonette - conversion

6 Other

8 Unable to obtain information

99 (Refusal)

Q1384 [SAPCond] \$

INTERVIEWER: Which of these best describes the condition of residential  
properties in the area?

1 Mainly good

2 Mainly fair

3 Mainly bad

4 Mainly very bad

8 Unable to obtain information

99 (Refusal)

Q1385 [SAECond] \$

INTERVIEWER: How is the external condition of the selected flat or house  
(i.e. the selected dwelling unit) relative to other residential  
properties in the area?

CODE ONE ONLY.

1 Better

2 About the same

3 Worse

8 Unable to obtain information

99 (Refusal)

Q1386 [SAAdCon] \$

INTERVIEWER: Was the address on the ARF label correct and complete for  
the house/flat/building/dwelling unit  
to which this serial number relates?

Answer No if you have noted any address amendment on the ARF or  
if you have identified multiple dwelling units within the issued  
address.

Enter the required changes at the next question.

1 Yes  
2 No

Q1387 [SAAdCor1] \$  
INTERVIEWER: Please enter the correct address.

First line...  
Open Question (Maximum of 40 characters)

Q1388 [SAAdCor2] \$  
  
(Please enter the correct address.)

Second line...  
Open Question (Maximum of 40 characters)

Q1389 [SAAdCor3] \$  
  
(Please enter the correct address.)

Third line...  
  
(Just press <Enter> if no more to add.)  
Open Question (Maximum of 40 characters)

Q1390 [SAAdCor4] \$  
  
(Please enter the correct address.)

Fourth line...  
  
(Just press <Enter> if no more to add.)  
Open Question (Maximum of 40 characters)

Q1391 [SAAdCor5] \$  
  
(Please enter the correct address.)

Fifth line...  
  
(Just press <Enter> if no more to add.)  
Open Question (Maximum of 40 characters)

Q1392 [SAPCCor] \$  
  
(Please enter the correct address.)

Postcode...  
Open Question (Maximum of 10 characters)

Q1393 [SAConfm] \$  
INTERVIEWER: Please check the details you have entered (in red).

Interviewed/selected: ^Person[1]  
^Person[2]  
^Person[3]  
^Person[4]  
Main contact person: ^SACNTxt ^SACNFor ^SACNSur  
  
Phone 1: ^SA1Tel

Phone 2:^SA2Tel ^AddrLines

Are they correct? Go back and change if not.

Else, press <1> and <Enter> to confirm. **Note:** This will hide the personal details.

Range: 1 ... 1

Q1394 [SASupFlg] \$

INTERVIEWER:Was a supervisor present for all or part of this interview?

1 Yes - present for all or part

2 No - not present

Q1395 [Date\_of\_Receipt] \$

Date return of work file received in office

Open Question (Maximum of 17 characters)

Q1396 [IntStatus] \$

Interview status

1 Interview not started

2 Started interview

3 Partial interview

4 Full interview

5 No interview required (Non-productive/deadwood)

8 (Don't know)

9 (Refusal)

Q1397 [IntDone] \$

Admin block completed?

1 Yes

2 No

8 (Don't know)

9 (Refusal)

Q1398 [InterNote] \$

Interviewer comment

Open Question (Maximum of 100 characters)

Q1399 [Outcome] \$

Final outcome code

Range: 0 ... 997

998 (Don't know)

999 (Refusal)

Q1400 [NOFHH] \$

Number of households at address

Range: 0 ... 97

98 (Don't know)

99 (Refusal)

Q1401- [PayItem] \$

Q1420 CAPI pay item

Range: 0 ... 97

98 (Don't know)

99 (Refusal)

Q1421 [SurvStatus] \$

Survey specific status (spare)

1 C1

2 C2

|    |              |
|----|--------------|
| 3  | C3           |
| 4  | C4           |
| 5  | C5           |
| 6  | C6           |
| 7  | C7           |
| 8  | C8           |
| 9  | C9           |
| 10 | C10          |
| 11 | C11          |
| 12 | C12          |
| 13 | C13          |
| 14 | C14          |
| 98 | (Don't know) |
| 99 | (Refusal)    |
