# Supplementary material
Source: MDPI journal article supplement (https://www.mdpi.com/2071-1050/11/16/4274)
Supplement: s1 [file s1 › Eurobarómetro 406 79-4 ZA5852_q_gb.pdf]

**ZA5852**

**Eurobarometer 79.4**

**Country Questionnaire  
Great Britain**

|   |                      |                      |                      |                      |                      |                      |                      |                      |                      |                      |
|---|----------------------|----------------------|----------------------|----------------------|----------------------|----------------------|----------------------|----------------------|----------------------|----------------------|
| A | your survey number   |                      |                      |                      |                      |                      |                      |                      |                      |                      |
|   | <b>(101-105)</b>     |                      |                      |                      |                      |                      |                      |                      |                      |                      |
|   | <input type="text"/> |
|   | EB79.3 A             |                      |                      |                      |                      |                      |                      |                      |                      |                      |
| B | Country code         |                      |                      |                      |                      |                      |                      |                      |                      |                      |
|   | <b>(106-107)</b>     |                      |                      |                      |                      |                      |                      |                      |                      |                      |
|   | <input type="text"/> |
|   | EB79.3 B             |                      |                      |                      |                      |                      |                      |                      |                      |                      |
| C | our survey number    |                      |                      |                      |                      |                      |                      |                      |                      |                      |
|   | <b>(108-110)</b>     |                      |                      |                      |                      |                      |                      |                      |                      |                      |
|   | <input type="text"/> |
|   | EB79.3 C             |                      |                      |                      |                      |                      |                      |                      |                      |                      |
| D | Interview number     |                      |                      |                      |                      |                      |                      |                      |                      |                      |
|   | <b>(111-116)</b>     |                      |                      |                      |                      |                      |                      |                      |                      |                      |
|   | <input type="text"/> |
|   | EB79.3 D             |                      |                      |                      |                      |                      |                      |                      |                      |                      |

|                             |
|-----------------------------|
| ASK ITEM 28 ONLY IN CROATIA |
|-----------------------------|

|    |                                                                            |
|----|----------------------------------------------------------------------------|
| Q1 | What is your nationality? Please tell me the country(ies) that applies(y). |
|----|----------------------------------------------------------------------------|

|                             |
|-----------------------------|
| (MULTIPLE ANSWERS POSSIBLE) |
|-----------------------------|

|                                                  | (137-166) |
|--------------------------------------------------|-----------|
| Belgium                                          | 1,        |
| Denmark                                          | 2,        |
| Germany                                          | 3,        |
| Greece                                           | 4,        |
| Spain                                            | 5,        |
| France                                           | 6,        |
| Ireland                                          | 7,        |
| Italy                                            | 8,        |
| Luxembourg                                       | 9,        |
| Netherlands                                      | 10,       |
| Portugal                                         | 11,       |
| United Kingdom (Great Britain, Northern Ireland) | 12,       |
| Austria                                          | 13,       |
| Sweden                                           | 14,       |
| Finland                                          | 15,       |
| Republic of Cyprus                               | 16,       |
| Czech Republic                                   | 17,       |
| Estonia                                          | 18,       |
| Hungary                                          | 19,       |
| Latvia                                           | 20,       |
| Lithuania                                        | 21,       |
| Malta                                            | 22,       |
| Poland                                           | 23,       |
| Slovakia                                         | 24,       |
| Slovenia                                         | 25,       |
| Bulgaria                                         | 26,       |
| Romania                                          | 27,       |
| Other countries                                  | 29,       |
| DK                                               | 30,       |

|           |
|-----------|
| EB79.2 Q1 |
|-----------|

|                                     |
|-------------------------------------|
| IF OTHER or DK THEN CLOSE INTERVIEW |
|-------------------------------------|

|         |
|---------|
| ASK ALL |
|---------|

|                   |
|-------------------|
| A. SOCIAL CLIMATE |
|-------------------|

|     |                                                                                |
|-----|--------------------------------------------------------------------------------|
| QA1 | On the whole, how satisfied or not are you with the life you lead? Are you...? |
|-----|--------------------------------------------------------------------------------|

|                   |
|-------------------|
| (ONE ANSWER ONLY) |
|-------------------|

|                      |       |
|----------------------|-------|
|                      | (187) |
| Very satisfied       | 1     |
| Fairly satisfied     | 2     |
| Not very satisfied   | 3     |
| Not at all satisfied | 4     |
| DK                   | 5     |

|            |
|------------|
| EB77.4 QB1 |
|------------|

|     |                                                                           |
|-----|---------------------------------------------------------------------------|
| QA2 | How would you judge the current situation in each of the following areas? |
|-----|---------------------------------------------------------------------------|

(SHOW SCREEN WITH SCALE - SINGLE CODE)

|       | (READ OUT)                                                                                                         | Very good | Fairly good | Fairly bad | Very bad | DK |
|-------|--------------------------------------------------------------------------------------------------------------------|-----------|-------------|------------|----------|----|
| (188) | 1 The area you live in                                                                                             | 1         | 2           | 3          | 4        | 5  |
|       | 2 Health care provision in the United Kingdom                                                                      | 1         | 2           | 3          | 4        | 5  |
| (189) | 3 The provision of pensions in the United Kingdom                                                                  | 1         | 2           | 3          | 4        | 5  |
| (190) | 4 Unemployment benefits in the United Kingdom                                                                      | 1         | 2           | 3          | 4        | 5  |
| (191) | 5 The cost of living in the United Kingdom                                                                         | 1         | 2           | 3          | 4        | 5  |
| (192) | 6 Relations in the United Kingdom between people from different cultural or religious backgrounds or nationalities | 1         | 2           | 3          | 4        | 5  |
| (193) | 7 The way inequalities and poverty are addressed in the United Kingdom                                             | 1         | 2           | 3          | 4        | 5  |
| (194) | 8 How affordable energy is in the United Kingdom                                                                   | 1         | 2           | 3          | 4        | 5  |
| (195) | 9 How affordable housing is in the United Kingdom                                                                  | 1         | 2           | 3          | 4        | 5  |
| (196) | 10 The way public administration operates in the United Kingdom                                                    | 1         | 2           | 3          | 4        | 5  |
| (197) | 11 The state of the UK economy                                                                                     | 1         | 2           | 3          | 4        | 5  |
| (198) | 12 Your personal job situation                                                                                     | 1         | 2           | 3          | 4        | 5  |
| (199) | 13 The financial situation of your household                                                                       | 1         | 2           | 3          | 4        | 5  |
| (200) | 14 The employment situation in the United Kingdom                                                                  | 1         | 2           | 3          | 4        | 5  |
| (201) |                                                                                                                    |           |             |            |          |    |

EB77.4 QB2

|     |                                                                                                                                       |
|-----|---------------------------------------------------------------------------------------------------------------------------------------|
| QA3 | What are your expectations for the next twelve months: will the next twelve months be better, worse or the same, when it comes to...? |
|-----|---------------------------------------------------------------------------------------------------------------------------------------|

(SINGLE CODE)

|       | (READ OUT)                                                                                                         | Better | Worse | Same | DK |
|-------|--------------------------------------------------------------------------------------------------------------------|--------|-------|------|----|
| (202) | 1 Your life in general                                                                                             | 1      | 2     | 3    | 4  |
| (203) | 2 The area you live in                                                                                             | 1      | 2     | 3    | 4  |
| (204) | 3 The healthcare system in the United Kingdom                                                                      | 1      | 2     | 3    | 4  |
| (205) | 4 The provision of pensions in the United Kingdom                                                                  | 1      | 2     | 3    | 4  |
| (206) | 5 Unemployment benefits in the United Kingdom                                                                      | 1      | 2     | 3    | 4  |
| (207) | 6 The cost of living in the United Kingdom                                                                         | 1      | 2     | 3    | 4  |
| (208) | 7 Relations in the United Kingdom between people from different cultural or religious backgrounds or nationalities | 1      | 2     | 3    | 4  |
| (209) | 8 The way inequalities and poverty are addressed in the United Kingdom                                             | 1      | 2     | 3    | 4  |
| (210) | 9 How affordable energy is in the United Kingdom                                                                   | 1      | 2     | 3    | 4  |
| (211) | 10 How affordable housing is in the United Kingdom                                                                 | 1      | 2     | 3    | 4  |
| (212) | 11 The way public administration runs in the United Kingdom                                                        | 1      | 2     | 3    | 4  |
| (213) | 12 The state of the UK economy                                                                                     | 1      | 2     | 3    | 4  |
| (214) | 13 Your personal job situation                                                                                     | 1      | 2     | 3    | 4  |
| (215) | 14 The financial situation of your household                                                                       | 1      | 2     | 3    | 4  |
| (216) | 15 The employment situation in the United Kingdom                                                                  | 1      | 2     | 3    | 4  |

EB77.4 QB3

|     |                                                                                                                           |
|-----|---------------------------------------------------------------------------------------------------------------------------|
| QA4 | Compared with five years ago, would you say things have improved, got worse or stayed about the same when it comes to...? |
|-----|---------------------------------------------------------------------------------------------------------------------------|

(SINGLE CODE)

|       | (READ OUT)                                                                                                         | Improved | Got worse | Stayed about the same | DK |
|-------|--------------------------------------------------------------------------------------------------------------------|----------|-----------|-----------------------|----|
| (217) | 1 Your life in general                                                                                             | 1        | 2         | 3                     | 4  |
| (218) | 2 The area you live in                                                                                             | 1        | 2         | 3                     | 4  |
| (219) | 3 The healthcare system in the United Kingdom                                                                      | 1        | 2         | 3                     | 4  |
| (220) | 4 The provision of pensions in the United Kingdom                                                                  | 1        | 2         | 3                     | 4  |
| (221) | 5 Unemployment benefits in the United Kingdom                                                                      | 1        | 2         | 3                     | 4  |
| (222) | 6 The cost of living in the United Kingdom                                                                         | 1        | 2         | 3                     | 4  |
| (223) | 7 Relations in the United Kingdom between people from different cultural or religious backgrounds or nationalities | 1        | 2         | 3                     | 4  |
| (224) | 8 The way inequalities and poverty are addressed in the United Kingdom                                             | 1        | 2         | 3                     | 4  |
| (225) | 9 The affordability of energy in the United Kingdom                                                                | 1        | 2         | 3                     | 4  |
| (226) | 10 The affordability of housing in the United Kingdom                                                              | 1        | 2         | 3                     | 4  |
| (227) | 11 The way public administration operates in the United Kingdom                                                    | 1        | 2         | 3                     | 4  |
| (228) | 12 The state of the UK economy                                                                                     | 1        | 2         | 3                     | 4  |
| (229) | 13 Your personal job situation                                                                                     | 1        | 2         | 3                     | 4  |
| (230) | 14 The financial situation of your household                                                                       | 1        | 2         | 3                     | 4  |
| (231) | 15 The employment situation in the United Kingdom                                                                  | 1        | 2         | 3                     | 4  |

EB77.4 QB4

|     |                                                                                                       |
|-----|-------------------------------------------------------------------------------------------------------|
| QA5 | In your opinion, which three of the following issues should the European Union address as a priority? |
|-----|-------------------------------------------------------------------------------------------------------|

(SHOW SCREEN - READ OUT - MAX. 3 ANSWERS)

(232-243)

|                                                                         |     |
|-------------------------------------------------------------------------|-----|
| Ageing population                                                       | 1,  |
| Unemployment                                                            | 2,  |
| Poverty                                                                 | 3,  |
| Equal opportunities for all                                             | 4,  |
| Integration of minorities (ethnic minorities, disabled, migrants, etc.) | 5,  |
| Health                                                                  | 6,  |
| Climate change                                                          | 7,  |
| Crime                                                                   | 8,  |
| Education and training                                                  | 9,  |
| Other (SPONTANEOUS)                                                     | 10, |
| None (SPONTANEOUS)                                                      | 11, |
| DK                                                                      | 12, |

EB73.5 QB1

|     |                                                                                                                                           |
|-----|-------------------------------------------------------------------------------------------------------------------------------------------|
| QA6 | When it comes to social and employment issues, in your opinion, which three of the following areas should the EU invest in as a priority? |
|-----|-------------------------------------------------------------------------------------------------------------------------------------------|

(SHOW SCREEN - READ OUT - MAX. 3 ANSWERS)

(244-257)

|                                                 |     |
|-------------------------------------------------|-----|
| Education and training                          | 1,  |
| Healthcare                                      | 2,  |
| Entrepreneurship                                | 3,  |
| Job creation                                    | 4,  |
| Social security                                 | 5,  |
| Culture                                         | 6,  |
| Fighting discrimination                         | 7,  |
| More effective public administration            | 8,  |
| Research and innovation                         | 9,  |
| Integration of people excluded from the society | 10, |
| Access to employment                            | 11, |
| Other (SPONTANEOUS)                             | 12, |
| None (SPONTANEOUS)                              | 13, |
| DK                                              | 14, |

EB73.5 QB2

|     |                                                                                                        |
|-----|--------------------------------------------------------------------------------------------------------|
| QA7 | In your opinion, when it comes to social and employment issues, should the European Union focus on...? |
|-----|--------------------------------------------------------------------------------------------------------|

(READ OUT – ONE ANSWER ONLY)

(258)

|                                                    |   |
|----------------------------------------------------|---|
| The whole of the EU                                | 1 |
| Mainly on the poorest countries\ regions of the EU | 2 |
| It depends of the issue (SPONTANEOUS)              | 3 |
| DK                                                 | 4 |

EB73.5 QB3

|     |                                                   |
|-----|---------------------------------------------------|
| QA8 | Have you heard of the European Social Fund (ESF)? |
|-----|---------------------------------------------------|

(READ OUT – ONE ANSWER ONLY)

(259)

|                                           |   |
|-------------------------------------------|---|
| Yes, and you know what it is              | 1 |
| Yes, but you don't know really what it is | 2 |
| No                                        | 3 |
| DK                                        | 4 |

EB73.5 QB4

B. EU DEVELOPMENT AID AND MILLENIUM DEVELOPMENT GOALS

The European Union provides development aid to assist certain countries outside the European Union in their fight against poverty and in their development. European Union development aid consists of the aid provided by both the European Commission and the national Governments of the European Union Member States.

QB1 In your opinion, is it very important, fairly important, not very important or not at all important to help people in developing countries?

(SHOW SCREEN - SINGLE CODE)

(280)

|                      |   |
|----------------------|---|
| Very important       | 1 |
| Fairly important     | 2 |
| Not very important   | 3 |
| Not at all important | 4 |
| DK                   | 5 |

EB77.4 QA1

QB2 The EU (the European Commission and Member States) has promised to increase the level of its aid to developing countries. Given the current economic situation, which of the following statements best describes your opinion?

(READ OUT - SINGLE CODE)

(281)

|                                                                                     |   |
|-------------------------------------------------------------------------------------|---|
| We should increase aid to developing countries beyond what is already promised      | 1 |
| We should keep our promise to increase aid to developing countries                  | 2 |
| We should not increase aid to developing countries even though it has been promised | 3 |
| We should reduce aid to developing countries as we can no longer afford it          | 4 |
| DK                                                                                  | 5 |

EB77.4 QA2

|     |                                                                                                                                                                                |
|-----|--------------------------------------------------------------------------------------------------------------------------------------------------------------------------------|
| QB3 | The current world population is around 7 billion people. Could you tell me approximately how many people in the world live in extreme poverty, that is on less than \$1 a day? |
|-----|--------------------------------------------------------------------------------------------------------------------------------------------------------------------------------|

(SHOW SCREEN – READ OUT – ONE ANSWER ONLY)

|                                             |              |
|---------------------------------------------|--------------|
|                                             | <b>(282)</b> |
| Less than 500 million                       | 1            |
| Between 500 million and 1 billion           | 2            |
| Between more than 1 billion and 1.5 billion | 3            |
| Between more than 1.5 billion and 2 billion | 4            |
| Between more than 2 billion and 2.5 billion | 5            |
| More than 2.5 billion                       | 6            |
| DK                                          | 7            |

NEW

|     |                                                                                                                                                                                 |
|-----|---------------------------------------------------------------------------------------------------------------------------------------------------------------------------------|
| QB4 | Would you be prepared to pay more for groceries or other products from developing countries to support people living in these countries (for instance for fair trade products)? |
|-----|---------------------------------------------------------------------------------------------------------------------------------------------------------------------------------|

(READ OUT – ONE ANSWER ONLY)

|                                                   |              |
|---------------------------------------------------|--------------|
|                                                   | <b>(283)</b> |
| No, you are not ready to pay more                 | 1            |
| Yes, you would be ready to pay up to 5% more      | 2            |
| Yes, you would be ready to pay 6 to 10% more      | 3            |
| Yes, you would be ready to pay more than 10% more | 4            |
| DK                                                | 5            |

EB77.4 QA9

|     |                                                                     |
|-----|---------------------------------------------------------------------|
| QB5 | Have you ever heard or read about the Millennium Development Goals? |
|-----|---------------------------------------------------------------------|

(READ OUT – ONE ANSWER ONLY)

|                                           |              |
|-------------------------------------------|--------------|
|                                           | <b>(284)</b> |
| Yes, and you know what it is              | 1            |
| Yes, but you don't really know what it is | 2            |
| No                                        | 3            |
| DK                                        | 4            |

EB71.2 QF2

|     |                                                                                          |
|-----|------------------------------------------------------------------------------------------|
| QB6 | Which of the following areas do you think development policy should focus on after 2015? |
|-----|------------------------------------------------------------------------------------------|

(SHOW SCREEN – READ OUT – MAX. 3 ANSWERS)

(285-301)

|                            |     |
|----------------------------|-----|
| Food and agriculture       | 1,  |
| Health                     | 2,  |
| Education                  | 3,  |
| Employment                 | 4,  |
| Gender equality            | 5,  |
| Access to information      | 6,  |
| Trade                      | 7,  |
| Water and sanitation       | 8,  |
| Peace and security         | 9,  |
| Environmental protection   | 10, |
| Democracy and human rights | 11, |
| Energy                     | 12, |
| Economic growth            | 13, |
| Social protection          | 14, |
| Other (SPONTANEOUS)        | 15, |
| None (SPONTANEOUS)         | 16, |
| DK                         | 17, |

NEW (BASED ON EB77.4 QA4)

In the year 2000, Heads of State or Government representing nearly all countries in the world agreed on Millennium Development Goals to improve the lives of people in developing countries by the year 2015.

QB7 For the following goals, please tell me if you think that it is fully achievable, partially achievable or not achievable worldwide in the next 10 years?

(SHOW SCREEN WITH SCALE – SINGLE CODE)

|  | (READ OUT) | Yes, it is<br>fully<br>achievable | Yes, it is<br>partially<br>achievable | No, it is<br>not<br>achievable | DK |
|--|------------|-----------------------------------|---------------------------------------|--------------------------------|----|
|--|------------|-----------------------------------|---------------------------------------|--------------------------------|----|

|       |   |                                                                             |   |   |   |   |
|-------|---|-----------------------------------------------------------------------------|---|---|---|---|
| (302) | 1 | Eradicate extreme poverty and hunger                                        | 1 | 2 | 3 | 4 |
| (303) | 2 | Achieve universal primary education                                         | 1 | 2 | 3 | 4 |
| (304) | 3 | Achieve gender equality                                                     | 1 | 2 | 3 | 4 |
| (305) | 4 | Reduce to the minimum child mortality rates                                 | 1 | 2 | 3 | 4 |
| (306) | 5 | Reduce to the minimum the number of women who die as a result of childbirth | 1 | 2 | 3 | 4 |
| (307) | 6 | Halt the spread of HIV/AIDS                                                 | 1 | 2 | 3 | 4 |

NEW

|     |                                                                                                          |
|-----|----------------------------------------------------------------------------------------------------------|
| QB8 | To what extent do you agree or disagree with each of the following statements regarding development aid. |
|-----|----------------------------------------------------------------------------------------------------------|

(SHOW SCREEN WITH SCALE – SINGLE CODE)

|       | (READ OUT)                                                                                                | Totally agree | Tend to agree | Tend to disagree | Totally disagree | DK |
|-------|-----------------------------------------------------------------------------------------------------------|---------------|---------------|------------------|------------------|----|
| (308) | 1 As an individual, you can play a role in tackling poverty in developing countries                       | 1             | 2             | 3                | 4                | 5  |
| (309) | 2 Tackling poverty in developing countries should be one of the main priorities of the EU                 | 1             | 2             | 3                | 4                | 5  |
| (310) | 3 Tackling poverty in developing countries should be one of the main priorities of the British Government | 1             | 2             | 3                | 4                | 5  |
| (311) | 4 Tackling poverty in developing countries has a positive influence on EU citizens as well                | 1             | 2             | 3                | 4                | 5  |

NEW

C. CYBER SECURITY

ASK ALL

QC1 How often do you access the Internet (for example, for sending emails, reading online news, chatting with friends or buying products online)?

(SHOW SCREEN – READ OUT – ONE ANSWER ONLY)

(332)

|                                   |   |
|-----------------------------------|---|
| Several times a day\ All the time | 1 |
| Once a day                        | 2 |
| Several times a week              | 3 |
| Once a week                       | 4 |
| Several times a month             | 5 |
| Once a month                      | 6 |
| Less often                        | 7 |
| Never                             | 8 |
| DK                                | 9 |

EB77.2 QE1 TREND SLIGHTLY MODIFIED

ASK QC2 TO QC6 IF "EVER USE THE INTERNET", CODE 1 TO 7 IN QC1 – OTHERS GO TO QC7

QC2 What devices do you use to access the Internet?

(SHOW SCREEN - READ OUT - MULTI CHOICE)

(333-339)

|                          |    |
|--------------------------|----|
| Desktop computer         | 1, |
| Laptop computer\ Netbook | 2, |
| Tablet computer          | 3, |
| Smartphone               | 4, |
| TV                       | 5, |
| Other (SPONTANEOUS)      | 6, |
| DK                       | 7, |

EB77.2 QE3 TREND MODIFIED

|     |                                                     |
|-----|-----------------------------------------------------|
| QC3 | Which of the following activities do you do online? |
|-----|-----------------------------------------------------|

(SHOW SCREEN - READ OUT - MULTI CHOICE)

(340-350)

|                                                         |     |
|---------------------------------------------------------|-----|
| Online banking                                          | 1,  |
| Buying goods or services (holidays, books, music, etc.) | 2,  |
| Selling goods or services                               | 3,  |
| Using online social networks                            | 4,  |
| Email                                                   | 5,  |
| Reading news online                                     | 6,  |
| Playing games online                                    | 7,  |
| Watching TV                                             | 8,  |
| Other (SPONTANEOUS)                                     | 9,  |
| None (SPONTANEOUS)                                      | 10, |
| DK                                                      | 11, |

EB77.2 QE4 TREND MODIFIED

|     |                                                                                                                      |
|-----|----------------------------------------------------------------------------------------------------------------------|
| QC4 | How confident are you about your ability to use the Internet for things like online banking or buying things online? |
|-----|----------------------------------------------------------------------------------------------------------------------|

(SHOW SCREEN – READ OUT – ONE ANSWER ONLY)

(351)

|                      |   |
|----------------------|---|
| Very confident       | 1 |
| Fairly confident     | 2 |
| Tend not to trust    | 3 |
| Not at all confident | 4 |
| DK                   | 5 |

EB77.2 QE5

|     |                                                                                                                     |
|-----|---------------------------------------------------------------------------------------------------------------------|
| QC5 | What concerns do you have, if any, about using the Internet for things like online banking or buying things online? |
|-----|---------------------------------------------------------------------------------------------------------------------|

(DO NOT SHOW SCREEN – DO NOT READ OUT – MULTIPLE ANSWERS POSSIBLE)

(352-358)

|                                                                                                                              |    |
|------------------------------------------------------------------------------------------------------------------------------|----|
| You prefer conducting the transaction in person e.g. so you can inspect the product yourself or ask a real person about them | 1, |
| You are concerned about the security of online payments                                                                      | 2, |
| You are concerned about someone taking\ misusing your personal data                                                          | 3, |
| You are concerned about not receiving the goods or services that you buy online                                              | 4, |
| Other                                                                                                                        | 5, |
| None                                                                                                                         | 6, |
| DK                                                                                                                           | 7, |

EB77.2 QE6

|     |                                                                                                              |
|-----|--------------------------------------------------------------------------------------------------------------|
| QC6 | Has concern about security issues made you change the way you use the Internet in any of the following ways? |
|-----|--------------------------------------------------------------------------------------------------------------|

(SHOW SCREEN - READ OUT - MULTI CHOICE)

(359-371)

|                                                                                          |     |
|------------------------------------------------------------------------------------------|-----|
| Less likely to buy goods online                                                          | 1,  |
| Less likely to bank online                                                               | 2,  |
| Less likely to give personal information on websites                                     | 3,  |
| Changing security settings (e.g. your browser, online social media, search engine, etc.) | 4,  |
| Only visit websites you know and trust                                                   | 5,  |
| Use different passwords for different sites                                              | 6,  |
| Do not open emails from people you don't know                                            | 7,  |
| Only use your own computer                                                               | 8,  |
| Have installed anti-virus software                                                       | 9,  |
| Cancelled an online purchase because of suspicions about the seller or website           | 10, |
| Other (SPONTANEOUS)                                                                      | 11, |
| None (SPONTANEOUS)                                                                       | 12, |
| DK                                                                                       | 13, |

EB77.2 QE7 TREND MODIFIED

ASK ALL

|     |                                                                                                                                                                                                                                                                                                                    |
|-----|--------------------------------------------------------------------------------------------------------------------------------------------------------------------------------------------------------------------------------------------------------------------------------------------------------------------|
| QC7 | Thinking about online harassment, have you or has one of your children ever been a victim of any kind of online harassment (this can include anything from cyber bullying or blackmailing to more serious Internet dangers)? IF NECESSARY; By children, we are talking about people currently under the age of 18. |
|-----|--------------------------------------------------------------------------------------------------------------------------------------------------------------------------------------------------------------------------------------------------------------------------------------------------------------------|

(READ OUT – MULTIPLE ANSWERS POSSIBLE)

(372-378)

|                                                       |    |
|-------------------------------------------------------|----|
| Yes, you personally                                   | 1, |
| Yes, one of your children                             | 2, |
| No                                                    | 3, |
| You don't have access to the Internet (SPONTANEOUS)   | 4, |
| Your children never access the Internet (SPONTANEOUS) | 5, |
| Refusal (SPONTANEOUS)                                 | 6, |
| DK                                                    | 7, |

NEW

|     |                                                              |
|-----|--------------------------------------------------------------|
| QC8 | How well informed do you feel about the risks of cybercrime? |
|-----|--------------------------------------------------------------|

(READ OUT - SINGLE CODE)

(379)

|                        |   |
|------------------------|---|
| Very well informed     | 1 |
| Fairly well informed   | 2 |
| Not very well informed | 3 |
| Not at all informed    | 4 |
| DK                     | 5 |

EB77.2 QE9

ASK QC9 TO QC13 IF "EVER USE THE INTERNET" CODE 1 TO 7 IN QC1 – OTHERS GO TO QD1

|     |                                                                                                                                                 |
|-----|-------------------------------------------------------------------------------------------------------------------------------------------------|
| QC9 | Cybercrimes can include many different types of criminal activity. How often have you experienced or been a victim of the following situations? |
|-----|-------------------------------------------------------------------------------------------------------------------------------------------------|

(SHOWSCREEN WITH SCALE)

|  |             |       |              |       |    |
|--|-------------|-------|--------------|-------|----|
|  | (READ OUT ) | Often | Occasionally | Never | DK |
|--|-------------|-------|--------------|-------|----|

|       |   |                                                                                                                                                        |   |   |   |   |
|-------|---|--------------------------------------------------------------------------------------------------------------------------------------------------------|---|---|---|---|
| (380) | 1 | Identity theft (somebody stealing your personal data and impersonating you, e.g. shopping under your name)                                             | 1 | 2 | 3 | 4 |
| (381) | 2 | Received emails or phone calls fraudulently asking for access to your computer, logins, or personal details (including banking or payment information) | 1 | 2 | 3 | 4 |
| (382) | 3 | Online fraud where goods purchased were not delivered, counterfeit or not as advertised                                                                | 1 | 2 | 3 | 4 |
| (383) | 4 | Accidentally encountering material which promotes racial hatred or religious extremism                                                                 | 1 | 2 | 3 | 4 |
| (384) | 5 | Not being able to access online services (e.g. banking services) because of cyber attacks                                                              | 1 | 2 | 3 | 4 |
| (385) | 6 | Your social media or email account being hacked                                                                                                        | 1 | 2 | 3 | 4 |
| (386) | 7 | Being a victim of credit card or banking fraud online                                                                                                  | 1 | 2 | 3 | 4 |

EB77.2 QE10 TREND MODIFIED

|      |                                                                                                         |
|------|---------------------------------------------------------------------------------------------------------|
| QC10 | And how concerned are you personally about experiencing or being a victim of the following cybercrimes? |
|------|---------------------------------------------------------------------------------------------------------|

(SHOWSCREEN WITH SCALE)

|       | (READ OUT )                                                                                                                                               | Very worried | Fairly worried | Not very worried | Not at all worried | DK |
|-------|-----------------------------------------------------------------------------------------------------------------------------------------------------------|--------------|----------------|------------------|--------------------|----|
| (387) | 1 Identity theft (somebody stealing your personal data and impersonating you, e.g. shopping under your name)                                              | 1            | 2              | 3                | 4                  | 5  |
| (388) | 2 Receiving emails or phone calls fraudulently asking for access to your computer, logins, or personal details (including banking or payment information) | 1            | 2              | 3                | 4                  | 5  |
| (389) | 3 Online fraud where goods purchased are not delivered, counterfeit or not as advertised                                                                  | 1            | 2              | 3                | 4                  | 5  |
| (390) | 4 Accidentally encountering child pornography online                                                                                                      | 1            | 2              | 3                | 4                  | 5  |
| (391) | 5 Accidentally encountering material which promotes racial hatred or religious extremism                                                                  | 1            | 2              | 3                | 4                  | 5  |
| (392) | 6 Not being able to access online services (e.g. banking services) because of cyber attacks                                                               | 1            | 2              | 3                | 4                  | 5  |
| (393) | 7 Your social media or email account being hacked                                                                                                         | 1            | 2              | 3                | 4                  | 5  |
| (394) | 8 Being a victim of credit card or banking fraud online                                                                                                   | 1            | 2              | 3                | 4                  | 5  |

EB77.2 QE11 TREND MODIFIED

|      |                                                                                          |
|------|------------------------------------------------------------------------------------------|
| QC11 | If you experienced or were a victim of the following cybercrimes, who would you contact? |
|------|------------------------------------------------------------------------------------------|

(SHOW SCREEN WITH SCALE - MULTIPLE ANSWERS PER LINE)

|  |             |               |                            |                                                     |                                                                         |                                    |                                    |                             |
|--|-------------|---------------|----------------------------|-----------------------------------------------------|-------------------------------------------------------------------------|------------------------------------|------------------------------------|-----------------------------|
|  | (READ OUT ) | The<br>police | Web<br>site\<br>vend<br>or | Your<br>inter<br>net<br>servi<br>ce<br>provi<br>der | To a<br>consu<br>mer<br>rights<br>protec<br>tion<br>asso<br>ciati<br>on | Othe<br>r<br>(RE<br>AD<br>OUT<br>) | No<br>one<br>(RE<br>AD<br>OUT<br>) | DK<br>(RE<br>AD<br>OUT<br>) |
|--|-------------|---------------|----------------------------|-----------------------------------------------------|-------------------------------------------------------------------------|------------------------------------|------------------------------------|-----------------------------|

|           |   |                                                                                                                                                         |    |    |    |    |    |    |    |
|-----------|---|---------------------------------------------------------------------------------------------------------------------------------------------------------|----|----|----|----|----|----|----|
| (395-401) | 1 | Identity theft (somebody stealing your personal data and impersonating you, e.g. shopping under your name)                                              | 1, | 2, | 3, | 4, | 5, | 6, | 7, |
| (402-408) | 2 | Receiving emails or phone calls fraudulently asking for access to your computer, logins, or personal details (including banking or payment information) | 1, | 2, | 3, | 4, | 5, | 6, | 7, |
| (409-415) | 3 | Online fraud where goods purchased are not delivered, counterfeit or not as advertised                                                                  | 1, | 2, | 3, | 4, | 5, | 6, | 7, |
| (416-422) | 4 | Accidentally encountering child pornography online                                                                                                      | 1, | 2, | 3, | 4, | 5, | 6, | 7, |
| (423-429) | 5 | Accidentally encountering material which promotes racial hatred or religious extremism                                                                  | 1, | 2, | 3, | 4, | 5, | 6, | 7, |
| (430-436) | 6 | Not being able to access online services (e.g. banking services) because of cyber attacks                                                               | 1, | 2, | 3, | 4, | 5, | 6, | 7, |
| (437-443) | 7 | Your social media or email account being hacked                                                                                                         | 1, | 2, | 3, | 4, | 5, | 6, | 7, |
| (444-450) | 8 | Being a victim of credit card or banking fraud online                                                                                                   | 1, | 2, | 3, | 4, | 5, | 6, | 7, |

EB77.2 QE12 TREND MODIFIED

|      |                                                                                                      |
|------|------------------------------------------------------------------------------------------------------|
| QC12 | Could you please tell me to what extent you agree or disagree with each of the following statements? |
|------|------------------------------------------------------------------------------------------------------|

(SHOWSCREEN WITH SCALE)

|       | (READ OUT )                                                                                        | Totally agree | Tend to agree | Tend to disagree | Totally disagree | DK |
|-------|----------------------------------------------------------------------------------------------------|---------------|---------------|------------------|------------------|----|
| (451) | 1 You are concerned that your online personal information is not kept secure by websites           | 1             | 2             | 3                | 4                | 5  |
| (452) | 2 You are concerned that your online personal information is not kept secure by public authorities | 1             | 2             | 3                | 4                | 5  |
| (453) | 3 You avoid disclosing personal information online                                                 | 1             | 2             | 3                | 4                | 5  |
| (454) | 4 You believe the risk of becoming a victim of cybercrime has increased in the past year           | 1             | 2             | 3                | 4                | 5  |

EB77.2 QE13

|      |                                                                                                             |
|------|-------------------------------------------------------------------------------------------------------------|
| QC13 | Have you changed your password to access to any of the following online services during the past 12 months? |
|------|-------------------------------------------------------------------------------------------------------------|

(READ OUT – MULTIPLE ANSWERS POSSIBLE)

|                                       | (455-460) |
|---------------------------------------|-----------|
| Web-based e-mail                      | 1,        |
| Online social networks                | 2,        |
| Shopping website (e.g. travel agents) | 3,        |
| Online banking websites               | 4,        |
| None (SPONTANEOUS)                    | 5,        |
| DK                                    | 6,        |

EB77.2 QE14

D. URBAN MOBILITY

ASK ALL

QD1 How often do you...?

(SHOW SCREEN WITH SCALE – SINGLE CODE)

|  | (READ OUT) | Sev<br>eral<br>time<br>s a<br>day | Onc<br>e a<br>day | Two<br>or<br>thre<br>e<br>time<br>s a<br>wee<br>k | Abo<br>ut<br>once<br>a<br>wee<br>k | Two<br>or<br>thre<br>e<br>time<br>s a<br>mont<br>h | Less<br>often | Nev<br>er | DK |
|--|------------|-----------------------------------|-------------------|---------------------------------------------------|------------------------------------|----------------------------------------------------|---------------|-----------|----|
|--|------------|-----------------------------------|-------------------|---------------------------------------------------|------------------------------------|----------------------------------------------------|---------------|-----------|----|

(481)

|   |                                                       |   |   |   |   |   |   |   |   |
|---|-------------------------------------------------------|---|---|---|---|---|---|---|---|
| 1 | Use a car (whether as a driver or a passenger)        | 1 | 2 | 3 | 4 | 5 | 6 | 7 | 8 |
| 2 | Use public transport                                  | 1 | 2 | 3 | 4 | 5 | 6 | 7 | 8 |
| 3 | Ride a motorbike (whether as a driver or a passenger) | 1 | 2 | 3 | 4 | 5 | 6 | 7 | 8 |
| 4 | Cycle                                                 | 1 | 2 | 3 | 4 | 5 | 6 | 7 | 8 |
| 5 | Walk                                                  | 1 | 2 | 3 | 4 | 5 | 6 | 7 | 8 |

NEW

QD2 How often do you travel within cities?

(READ OUT – ONE ANSWER ONLY)

|                            | (486) |
|----------------------------|-------|
| Several times a day        | 1     |
| Once a day                 | 2     |
| Two or three times a week  | 3     |
| About once a week          | 4     |
| Two or three times a month | 5     |
| Less often                 | 6     |
| Never                      | 7     |
| DK                         | 8     |

NEW

ASK QD3 IF "TRAVEL WITHIN CITIES", CODE 1 TO 6 IN QD2 – OTHERS GO TO QD4

QD3 When travelling within cities, how often do you encounter problems that limit your access to activities, goods or services?

(READ OUT – ONE ANSWER ONLY)

(487)

|           |   |
|-----------|---|
| Often     | 1 |
| Sometimes | 2 |
| Rarely    | 3 |
| Never     | 4 |
| DK        | 5 |

NEW

ASK ALL

QD4 Do you think that the following issues are an important problem or not within cities?

(SHOW SCREEN WITH SCALE – SINGLE CODE)

|  | (READ OUT) | A very important problem | A fairly important problem | Not a very important problem | Not an important problem at all | DK |
|--|------------|--------------------------|----------------------------|------------------------------|---------------------------------|----|
|--|------------|--------------------------|----------------------------|------------------------------|---------------------------------|----|

|       |   |                  |   |   |   |   |   |
|-------|---|------------------|---|---|---|---|---|
| (488) | 1 | Road congestion  | 1 | 2 | 3 | 4 | 5 |
| (489) | 2 | Noise pollution  | 1 | 2 | 3 | 4 | 5 |
| (490) | 3 | Air pollution    | 1 | 2 | 3 | 4 | 5 |
| (491) | 4 | Accidents        | 1 | 2 | 3 | 4 | 5 |
| (492) | 5 | Travelling costs | 1 | 2 | 3 | 4 | 5 |

NEW

QD5 In the future, do you think the traffic situation within cities will improve, stay the same or get worse?

(READ OUT – ONE ANSWER ONLY)

(493)

|                         |   |
|-------------------------|---|
| Will improve a lot      | 1 |
| Will improve slightly   | 2 |
| Will stay the same      | 3 |
| Will get slightly worse | 4 |
| Will get a lot worse    | 5 |
| DK                      | 6 |

NEW

|     |                                                                     |
|-----|---------------------------------------------------------------------|
| QD6 | Which of the following measures could improve travel within cities? |
|-----|---------------------------------------------------------------------|

(SHOW SCREEN – READ OUT – MULTIPLE ANSWERS POSSIBLE)

(494-506)

|                                                                 |     |
|-----------------------------------------------------------------|-----|
| Better public transport                                         | 1,  |
| Reduce the number of parking spaces                             | 2,  |
| Lower speed limits                                              | 3,  |
| Improved walking facilities                                     | 4,  |
| Improved cycling facilities                                     | 5,  |
| Access restrictions at certain times                            | 6,  |
| Access restrictions for certain types of vehicles (e.g. trucks) | 7,  |
| Charges for road use (e.g. city tolls)                          | 8,  |
| Lower prices for public transport                               | 9,  |
| Incentives for carpooling or car sharing                        | 10, |
| Other (SPONTANEOUS)                                             | 11, |
| None (SPONTANEOUS)                                              | 12, |
| DK                                                              | 13, |

NEW (BASED ON FL206b Q4)

|     |                                                                                                        |
|-----|--------------------------------------------------------------------------------------------------------|
| QD7 | How effective do you think each of the following measures would be to improve travel within cities...? |
|-----|--------------------------------------------------------------------------------------------------------|

(SHOW SCREEN WITH SCALE - SINGLE CODE)

|  | (READ OUT) | Very effective | Fairly effective | Not very effective | Not effective at all | DK |
|--|------------|----------------|------------------|--------------------|----------------------|----|
|--|------------|----------------|------------------|--------------------|----------------------|----|

(507)

|   |                                                                       |   |   |   |   |   |
|---|-----------------------------------------------------------------------|---|---|---|---|---|
| 1 | Restrictions on the use of certain types of vehicles (e.g. trucks)    | 1 | 2 | 3 | 4 | 5 |
| 2 | Awareness campaigns encouraging people to limit the use of their cars | 1 | 2 | 3 | 4 | 5 |
| 3 | Additional charges for the use of specific roads at specific times    | 1 | 2 | 3 | 4 | 5 |

(508)

(509)

NEW

|     |                                                                                       |
|-----|---------------------------------------------------------------------------------------|
| QD8 | In your opinion, who should be mainly responsible for reducing the traffic in cities? |
|-----|---------------------------------------------------------------------------------------|

|                                           |
|-------------------------------------------|
| (SHOW SCREEN – READ OUT – MAX. 2 ANSWERS) |
|-------------------------------------------|

|                        |           |
|------------------------|-----------|
|                        | (510-517) |
| The British Government | 1,        |
| Regional authorities   | 2,        |
| City authorities       | 3,        |
| Private companies      | 4,        |
| Citizens themselves    | 5,        |
| Other (SPONTANEOUS)    | 6,        |
| None (SPONTANEOUS)     | 7,        |
| DK                     | 8,        |

|     |
|-----|
| NEW |
|-----|

|                              |
|------------------------------|
| E. ANTI-MICROBIAL RESISTANCE |
|------------------------------|

|         |
|---------|
| ASK ALL |
|---------|

|      |                                                                                               |
|------|-----------------------------------------------------------------------------------------------|
| QE1a | Have you taken any antibiotics orally such as tablets, powder or syrup in the last 12 months? |
|------|-----------------------------------------------------------------------------------------------|

|                   |
|-------------------|
| (ONE ANSWER ONLY) |
|-------------------|

(538)

|     |   |
|-----|---|
| Yes | 1 |
| No  | 2 |

|             |
|-------------|
| EB72.5 QD1a |
|-------------|

|                                                                |
|----------------------------------------------------------------|
| ASK QE1b AND QE1c IF "YES", CODE 1 IN QE1a – OTHERS GO TO QE2a |
|----------------------------------------------------------------|

|      |                                                                  |
|------|------------------------------------------------------------------|
| QE1b | How did you obtain the last course of antibiotics that you used? |
|------|------------------------------------------------------------------|

|                              |
|------------------------------|
| (READ OUT – ONE ANSWER ONLY) |
|------------------------------|

(539)

|                                               |   |
|-----------------------------------------------|---|
| From a medical prescription                   | 1 |
| Administered by a medical practitioner        | 2 |
| You had some left over from a previous course | 3 |
| Without prescription from a pharmacy          | 4 |
| Without prescription from elsewhere           | 5 |
| Don't remember (SPONTANEOUS)                  | 6 |
| DK                                            | 7 |

|             |
|-------------|
| EB72.5 QD1b |
|-------------|

|      |                                                                     |
|------|---------------------------------------------------------------------|
| QE1c | What was the reason for taking antibiotics last time you used them? |
|------|---------------------------------------------------------------------|

(READ OUT - MULTIPLE ANSWERS POSSIBLE)

(540-553)

|                                                                                                                       |     |
|-----------------------------------------------------------------------------------------------------------------------|-----|
| Pneumonia (an infection causing an inflammation of one or both lungs)                                                 | 1,  |
| Bronchitis (inflammation and swelling of the bronchi, the airways that carry airflow from the trachea into the lungs) | 2,  |
| Rhinopharyngitis (inflammation of the mucous membrane of the nose and pharynx)                                        | 3,  |
| Flu                                                                                                                   | 4,  |
| Cold                                                                                                                  | 5,  |
| Sore throat                                                                                                           | 6,  |
| Cough                                                                                                                 | 7,  |
| Fever                                                                                                                 | 8,  |
| Headache                                                                                                              | 9,  |
| Diarrhea                                                                                                              | 10, |
| Urinary tract infection                                                                                               | 11, |
| Skin or wound infection                                                                                               | 12, |
| Other (SPONTANEOUS)                                                                                                   | 13, |
| DK                                                                                                                    | 14, |

EB72.5 QD1c

ASK ALL

|      |                                                                                             |
|------|---------------------------------------------------------------------------------------------|
| QE2a | For each of the following statements, please tell me whether you think it is true or false. |
|------|---------------------------------------------------------------------------------------------|

(SINGLE CODE)

|       | (READ OUT)                                                     | True | False | DK |
|-------|----------------------------------------------------------------|------|-------|----|
| (554) | 1 Antibiotics kill viruses                                     | 1    | 2     | 3  |
| (555) | 2 Antibiotics are effective against cold and flu               | 1    | 2     | 3  |
| (556) | 3 Unnecessary use of antibiotics makes them become ineffective | 1    | 2     | 3  |
| (557) | 4 Taking antibiotics often has side-effects such as diarrhea   | 1    | 2     | 3  |

EB72.5 QD2a

|      |                                                                                                                                                              |
|------|--------------------------------------------------------------------------------------------------------------------------------------------------------------|
| QE2b | Please tell me to what extent you agree or disagree with the following statement: "Everyone has a role to play to ensure that antibiotics remain effective"? |
|------|--------------------------------------------------------------------------------------------------------------------------------------------------------------|

(READ OUT – ONE ANSWER ONLY)

(558)

|                  |   |
|------------------|---|
| Totally agree    | 1 |
| Tend to agree    | 2 |
| Tend to disagree | 3 |
| Totally disagree | 4 |
| DK               | 5 |

EB72.5 QD2b

|      |                                                                                                                                                                                           |
|------|-------------------------------------------------------------------------------------------------------------------------------------------------------------------------------------------|
| QE3a | In the last 12 months, do you remember getting any information about not taking any antibiotics unnecessarily, for example, messages about not taking antibiotics in case of cold or flu? |
|------|-------------------------------------------------------------------------------------------------------------------------------------------------------------------------------------------|

(ONE ANSWER ONLY)

(559)

|     |   |
|-----|---|
| Yes | 1 |
| No  | 2 |

EB72.5 QD3a

ASK QE3b TO QE3d IF "YES", CODE 1 IN QE3a – OTHERS GO TO QE4

|      |                                                                                          |
|------|------------------------------------------------------------------------------------------|
| QE3b | Where did you first get this information about not taking any antibiotics unnecessarily? |
|------|------------------------------------------------------------------------------------------|

(DO NOT SHOW SCREEN DO NOT READ OUT – – USE THE PRE-CODED LIST – ONE ANSWER ONLY)

(560-561)

|                                                                      |    |
|----------------------------------------------------------------------|----|
| A doctor told me                                                     | 1  |
| A pharmacist told me                                                 | 2  |
| Another health professional (e.g. nurse, physical therapist) told me | 3  |
| A family member or friend told me                                    | 4  |
| I saw it on a TV advertisement                                       | 5  |
| I saw it in a leaflet or on a poster                                 | 6  |
| I read it in a newspaper or I saw it on the TV news                  | 7  |
| I heard it on the radio                                              | 8  |
| I saw it on the Internet                                             | 9  |
| Others                                                               | 10 |
| DK                                                                   | 11 |

EB72.5 QD3b

|      |                                                                         |
|------|-------------------------------------------------------------------------|
| QE3c | Did the information that you received change your views on antibiotics? |
|------|-------------------------------------------------------------------------|

|                   |
|-------------------|
| (ONE ANSWER ONLY) |
|-------------------|

(562)

|     |   |
|-----|---|
| Yes | 1 |
| No  | 2 |
| DK  | 3 |

|             |
|-------------|
| EB72.5 QD3c |
|-------------|

|                                                      |
|------------------------------------------------------|
| ASK QE3d IF "YES", CODE 1 IN QE3c – OTHERS GO TO QE4 |
|------------------------------------------------------|

|      |                                                                    |
|------|--------------------------------------------------------------------|
| QE3d | In what way did this information change your views on antibiotics? |
|------|--------------------------------------------------------------------|

|                                        |
|----------------------------------------|
| (READ OUT – MULTIPLE ANSWERS POSSIBLE) |
|----------------------------------------|

(563-569)

|                                                                                    |    |
|------------------------------------------------------------------------------------|----|
| You will always consult a doctor in situations when you think you need antibiotics | 1, |
| You will no longer self-medicate with antibiotics                                  | 2, |
| You will no longer take antibiotics without a prescription from a doctor           | 3, |
| You will no longer keep left over antibiotics for next time you are ill            | 4, |
| Other (SPONTANEOUS)                                                                | 5, |
| None of these (SPONTANEOUS)                                                        | 6, |
| DK                                                                                 | 7, |

|             |
|-------------|
| EB72.5 QD3d |
|-------------|

|         |
|---------|
| ASK ALL |
|---------|

|     |                                                                                                                     |
|-----|---------------------------------------------------------------------------------------------------------------------|
| QE4 | Which of the following sources of information would you use in order to get trustworthy information on antibiotics? |
|-----|---------------------------------------------------------------------------------------------------------------------|

|                                           |
|-------------------------------------------|
| (SHOW SCREEN – READ OUT – MAX. 3 ANSWERS) |
|-------------------------------------------|

(570-586)

|                                                               |     |
|---------------------------------------------------------------|-----|
| A doctor                                                      | 1,  |
| A nurse                                                       | 2,  |
| A pharmacy                                                    | 3,  |
| A hospital                                                    | 4,  |
| Another health care facility                                  | 5,  |
| Family or friends                                             | 6,  |
| A government website\the Department of Health website         | 7,  |
| NHS DIRECT (The NHS website)                                  | 8,  |
| The Internet site on Public Health from the European Union    | 9,  |
| Another health related Internet site                          | 10, |
| A health or medical encyclopaedia                             | 11, |
| A national, independent public health body or organisation    | 12, |
| A newspaper or magazine                                       | 13, |
| A health related magazine                                     | 14, |
| Other (SPONTANEOUS)                                           | 15, |
| I am not looking for information on antibiotics (SPONTANEOUS) | 16, |
| DK                                                            | 17, |

|            |
|------------|
| EB72.5 QD4 |
|------------|

|                             |
|-----------------------------|
| F. SPACE DERIVED ACTIVITIES |
|-----------------------------|

|         |
|---------|
| ASK ALL |
|---------|

|                                                                                                                                                                                                                                                                                  |
|----------------------------------------------------------------------------------------------------------------------------------------------------------------------------------------------------------------------------------------------------------------------------------|
| <p>This survey is about needs of European citizens in about 20 years. It envisages what technologies and services derived from space activities could be available in order to improve daily life and to address "grand challenges" that the world will face for the future.</p> |
|----------------------------------------------------------------------------------------------------------------------------------------------------------------------------------------------------------------------------------------------------------------------------------|

|     |                                                                                                  |
|-----|--------------------------------------------------------------------------------------------------|
| QF1 | Which of the following, in 20 years' time, do you think should be the main priorities of the EU? |
|-----|--------------------------------------------------------------------------------------------------|

|                                           |
|-------------------------------------------|
| (SHOW SCREEN – READ OUT – MAX. 4 ANSWERS) |
|-------------------------------------------|

|                                          | (607-622) |
|------------------------------------------|-----------|
| Health                                   | 1,        |
| Security                                 | 2,        |
| Housing                                  | 3,        |
| Environment                              | 4,        |
| Energy                                   | 5,        |
| Transport                                | 6,        |
| Communication                            | 7,        |
| Food production quality and distribution | 8,        |
| Leisure activities                       | 9,        |
| Education                                | 10,       |
| Social rights                            | 11,       |
| Human rights                             | 12,       |
| Employment                               | 13,       |
| Economy                                  | 14,       |
| Other (SPONTANEOUS)                      | 15,       |
| DK                                       | 16,       |

|     |
|-----|
| NEW |
|-----|

|     |                                                                                                                                     |
|-----|-------------------------------------------------------------------------------------------------------------------------------------|
| QF2 | In which of the following areas do you think space derived technologies and services will play an important role in 20 years' time? |
|-----|-------------------------------------------------------------------------------------------------------------------------------------|

(SHOW SCREEN – READ OUT – MULTIPLE ANSWERS POSSIBLE)

(623-638)

|                                          |     |
|------------------------------------------|-----|
| Health                                   | 1,  |
| Security                                 | 2,  |
| Housing                                  | 3,  |
| Environment                              | 4,  |
| Energy                                   | 5,  |
| Transport                                | 6,  |
| Communication                            | 7,  |
| Food production quality and distribution | 8,  |
| Leisure activities                       | 9,  |
| Education                                | 10, |
| Social rights                            | 11, |
| Human rights                             | 12, |
| Employment                               | 13, |
| Economy                                  | 14, |
| Other (SPONTANEOUS)                      | 15, |
| DK                                       | 16, |

NEW

|     |                                                                                                     |
|-----|-----------------------------------------------------------------------------------------------------|
| QF3 | To what extent do you think that investing in human space exploration can lead to medical progress? |
|-----|-----------------------------------------------------------------------------------------------------|

(READ OUT – ONE ANSWER ONLY)

(639)

|                |   |
|----------------|---|
| Definitely     | 1 |
| Probably       | 2 |
| Probably not   | 3 |
| Definitely not | 4 |
| DK             | 5 |

NEW

|     |                                                                                                                                                                                |
|-----|--------------------------------------------------------------------------------------------------------------------------------------------------------------------------------|
| QF4 | To what extent, do you think that further investments in Earth observation from space can provide a better understanding on the consequences of climate change in your region? |
|-----|--------------------------------------------------------------------------------------------------------------------------------------------------------------------------------|

(READ OUT – ONE ANSWER ONLY)

(640)

|                |   |
|----------------|---|
| Definitely     | 1 |
| Probably       | 2 |
| Probably not   | 3 |
| Definitely not | 4 |
| DK             | 5 |

NEW

In 20 years' time, Earth observation from space and other technologies should help to create maps that indicate the probability of threats such as air pollution, water quality or contagious diseases.

|     |                                                                                                                                  |
|-----|----------------------------------------------------------------------------------------------------------------------------------|
| QF5 | To what extent would you be interested in using such information to plan travels and outdoor activities for you and your family? |
|-----|----------------------------------------------------------------------------------------------------------------------------------|

(READ OUT – ONE ANSWER ONLY)

(641)

|                |   |
|----------------|---|
| Definitely     | 1 |
| Probably       | 2 |
| Probably not   | 3 |
| Definitely not | 4 |
| DK             | 5 |

NEW

|     |                                                                                                                                                                         |
|-----|-------------------------------------------------------------------------------------------------------------------------------------------------------------------------|
| QF6 | To what extent do you think that space technologies and space-based services can be used to predict prevailing winds, periods of sunshine or the availability of water? |
|-----|-------------------------------------------------------------------------------------------------------------------------------------------------------------------------|

(READ OUT - ONE ANSWER ONLY)

(642)

|                |   |
|----------------|---|
| Definitely     | 1 |
| Probably       | 2 |
| Probably not   | 3 |
| Definitely not | 4 |
| DK             | 5 |

NEW

|     |                                                                                                                                                                                  |
|-----|----------------------------------------------------------------------------------------------------------------------------------------------------------------------------------|
| QF7 | To what extent, do you think that space technologies and space-based services can contribute to better protection of the environment and more efficient agricultural activities? |
|-----|----------------------------------------------------------------------------------------------------------------------------------------------------------------------------------|

(READ OUT – ONE ANSWER ONLY)

(643)

|                |   |
|----------------|---|
| Definitely     | 1 |
| Probably       | 2 |
| Probably not   | 3 |
| Definitely not | 4 |
| DK             | 5 |

NEW

|     |                                                                                                                                                                                                                |
|-----|----------------------------------------------------------------------------------------------------------------------------------------------------------------------------------------------------------------|
| QF8 | To what extent, do you think that including subjects linked to space activities in educational materials would encourage more students to choose careers in science, technology, engineering, and mathematics? |
|-----|----------------------------------------------------------------------------------------------------------------------------------------------------------------------------------------------------------------|

(READ OUT – ONE ANSWER ONLY)

(644)

|                |   |
|----------------|---|
| Definitely     | 1 |
| Probably       | 2 |
| Probably not   | 3 |
| Definitely not | 4 |
| DK             | 5 |

NEW

|     |                                                                                                                                                        |
|-----|--------------------------------------------------------------------------------------------------------------------------------------------------------|
| QF9 | To what extent do you think that teaching subjects linked to space activities at school can help children to better imagine the society of the future? |
|-----|--------------------------------------------------------------------------------------------------------------------------------------------------------|

(READ OUT – ONE ANSWER ONLY)

(645)

|                |   |
|----------------|---|
| Definitely     | 1 |
| Probably       | 2 |
| Probably not   | 3 |
| Definitely not | 4 |
| DK             | 5 |

NEW

In 20 years' time, vehicles (e.g. cars, trucks, trains, ships, planes) will be able to operate without any direct human control. They will be guided by satellite based navigation systems.

QF10 In 20 years' time, to what extent would you be ready to use automated vehicles guided by satellite based navigation systems?

(READ OUT – ONE ANSWER ONLY)

(646)

|                |   |
|----------------|---|
| Definitely     | 1 |
| Probably       | 2 |
| Probably not   | 3 |
| Definitely not | 4 |
| DK             | 5 |

NEW

QF11 To what extent do you think that investing in space activities contribute to job creation in the EU?

(READ OUT – ONE ANSWER ONLY)

(647)

|                |   |
|----------------|---|
| Definitely     | 1 |
| Probably       | 2 |
| Probably not   | 3 |
| Definitely not | 4 |
| DK             | 5 |

NEW

QF12 Which of the following statements best describes your view about the use of observations from satellites and unmanned aerial vehicles and the monitoring of communications to manage border control and fight organised crime in the EU?

(READ OUT – ONE ANSWER ONLY)

(648)

|                                                            |   |
|------------------------------------------------------------|---|
| The use of this technology will improve security in the EU | 1 |
| The use of this technology will be a threat to privacy     | 2 |
| Both of them (SPONTANEOUS)                                 | 3 |
| None of them (SPONTANEOUS)                                 | 4 |
| DK                                                         | 5 |

NEW

|      |                                                                     |
|------|---------------------------------------------------------------------|
| QF13 | How concerned are you about big asteroids and comets hitting Earth? |
|------|---------------------------------------------------------------------|

|                              |
|------------------------------|
| (READ OUT – ONE ANSWER ONLY) |
|------------------------------|

(649)

|                      |   |
|----------------------|---|
| Very concerned       | 1 |
| Fairly concerned     | 2 |
| Not very concerned   | 3 |
| Not at all concerned | 4 |
| DK                   | 5 |

|     |
|-----|
| NEW |
|-----|

|      |                                                                                                                                                                                                                                                                                      |
|------|--------------------------------------------------------------------------------------------------------------------------------------------------------------------------------------------------------------------------------------------------------------------------------------|
| QF14 | How concerned are you about disruptions of space-based services, such as weather predictions, telecommunications or radio-navigation by satellite, caused by collisions between satellites or between satellites and pieces of rockets or other satellites (so-called space debris)? |
|------|--------------------------------------------------------------------------------------------------------------------------------------------------------------------------------------------------------------------------------------------------------------------------------------|

|                              |
|------------------------------|
| (READ OUT – ONE ANSWER ONLY) |
|------------------------------|

(650)

|                      |   |
|----------------------|---|
| Very concerned       | 1 |
| Fairly concerned     | 2 |
| Not very concerned   | 3 |
| Not at all concerned | 4 |
| DK                   | 5 |

|     |
|-----|
| NEW |
|-----|

|      |                                                                                                                                             |
|------|---------------------------------------------------------------------------------------------------------------------------------------------|
| QF15 | To what extent do you think that space technologies can play a role in reducing threats like asteroids and comets impacts and space debris? |
|------|---------------------------------------------------------------------------------------------------------------------------------------------|

|                              |
|------------------------------|
| (READ OUT – ONE ANSWER ONLY) |
|------------------------------|

(651)

|                              |   |
|------------------------------|---|
| A very important role        | 1 |
| A fairly important role      | 2 |
| Not a very important role    | 3 |
| Not an important role at all | 4 |
| DK                           | 5 |

|     |
|-----|
| NEW |
|-----|

Now let's talk specifically about space exploration.

QF16 How important is it for you that the EU invests further in space exploration?

(READ OUT – ONE ANSWER ONLY)

(652)

|                      |   |
|----------------------|---|
| Very important       | 1 |
| Fairly important     | 2 |
| Not very important   | 3 |
| Not at all important | 4 |
| DK                   | 5 |

NEW

ASK QF17a IF "INVESTING IN SPACE EXPLORATION IS IMPORTANT", CODE 1 OR 2 IN QF16 – OTHERS GO TO QF17b

QF17a For which of the following reasons, do you think it is important that the EU invests further in space exploration?

(SHOW SCREEN – READ OUT – MULTIPLE ANSWERS POSSIBLE)

(653-663)

|                                                   |     |
|---------------------------------------------------|-----|
| To expand our understanding of origins of life    | 1,  |
| To make unexpected scientific discoveries         | 2,  |
| To develop and test new technologies              | 3,  |
| To demonstrate the prestige of the EU             | 4,  |
| To inspire the young                              | 5,  |
| To keep up with other global players              | 6,  |
| To promote peaceful and international cooperation | 7,  |
| To contribute to economic development             | 8,  |
| Other (SPONTANEOUS)                               | 9,  |
| None (SPONTANEOUS)                                | 10, |
| DK                                                | 11, |

NEW

ASK QF17b IF "INVESTING IN SPACE EXPLORATION IS NOT IMPORTANT", CODE 3 OR 4 EN QF16 – OTHERS GO TO QF18

QF17b For which of the following reasons, do you think that it is not important that the EU invests further in space exploration?

(SHOW SCREEN – READ OUT – MULTIPLE ANSWERS POSSIBLE)

(664-671)

|                                      |    |
|--------------------------------------|----|
| There will be no immediate benefits  | 1, |
| It will be a waste of resources      | 2, |
| There are other more pressing issues | 3, |
| The EU cannot achieve this           | 4, |
| It is a too complex endeavour        | 5, |
| Other (SPONTANEOUS)                  | 6, |
| None (SPONTANEOUS)                   | 7, |
| DK                                   | 8, |

NEW

ASK ALL

QF18 How important do you think it is that Europeans explore Mars in 20 years as part of an international mission?

(READ OUT – ONE ANSWER ONLY)

(672)

|                      |   |
|----------------------|---|
| Very important       | 1 |
| Fairly important     | 2 |
| Not very important   | 3 |
| Not at all important | 4 |
| DK                   | 5 |

NEW

QF19 In 20 years' time, flights could go to the edge of space (altitude of about 100 kilometres). These flights are referred to as suborbital space flights. For which of the following reasons do you think that suborbital space flight could be useful?

(READ OUT – MULTIPLE ANSWERS POSSIBLE)

(673-678)

|                                                                          |    |
|--------------------------------------------------------------------------|----|
| To travel faster from one point to another                               | 1, |
| To develop new opportunities for tourism                                 | 2, |
| To transport extremely urgent and valuable goods to distant destinations | 3, |
| Other (SPONTANEOUS)                                                      | 4, |
| None (SPONTANEOUS)                                                       | 5, |
| DK                                                                       | 6, |

NEW

DEMOGRAPHICS

NO QUESTION D1 TO D6

D7 Could you tell me which of these best describes your own current situation?

(SHOW SCREEN - READ OUT)

(699-700)

|                                                                                     |
|-------------------------------------------------------------------------------------|
| MARRIED OR REMARRIED                                                                |
| Living without children                                                             |
| Living with the children of this marriage                                           |
| Living with the children of a previous marriage                                     |
| Living with the children of this marriage and of a previous marriage                |
| SINGLE LIVING WITH A PARTNER                                                        |
| Living without children                                                             |
| Living with the children of this partnership                                        |
| Living with the children of a previous marriage/partnership                         |
| Living with the children of this partnership and of a previous marriage/partnership |
| SINGLE                                                                              |
| Living without children                                                             |
| Living with children                                                                |
| DIVORCED OR SEPARATED                                                               |
| Living without children                                                             |
| Living with children                                                                |
| WIDOW/ER                                                                            |
| Living without children                                                             |
| Living with children                                                                |
|                                                                                     |
| Other (SPONTANEOUS)                                                                 |
| Refusal (SPONTANEOUS)                                                               |

1  
2  
3  
4  
  
5  
6  
7  
8  
  
9  
10  
  
11  
12  
  
13  
14  
  
15  
16

EB79.3 D7

D8 How old were you when you stopped full-time education?

(INT.: IF "STILL STUDYING", CODE '00' – IF "NO EDUCATION" CODE '01' – IF "REFUSAL" CODE '98' – IF "DK" CODE '99')

(701-702)

|  |  |
|--|--|
|  |  |
|--|--|

EB79.3 D8

NO QUESTION D9

D10 Gender.

(703)

|        |
|--------|
| Male   |
| Female |

1  
2

EB79.3 D10

|     |                               |
|-----|-------------------------------|
| D11 | How old are you?<br>(704-705) |
|     | <input type="text"/>          |

|            |
|------------|
| EB79.3 D11 |
|------------|

|                         |
|-------------------------|
| NO QUESTIONS D12 TO D14 |
|-------------------------|

|                                                                       |
|-----------------------------------------------------------------------|
| ASK D15b IF "NOT DOING ANY PAID WORK CURRENTLY", CODES 1 to 4 in D15a |
|-----------------------------------------------------------------------|

|      |                                  |
|------|----------------------------------|
| D15a | What is your current occupation? |
|------|----------------------------------|

|      |                                                                      |
|------|----------------------------------------------------------------------|
| D15b | Did you do any paid work in the past? What was your last occupation? |
|------|----------------------------------------------------------------------|

|                                                                                                              | (706-707)          | (708-709)       |
|--------------------------------------------------------------------------------------------------------------|--------------------|-----------------|
|                                                                                                              | D15a               | D15b            |
|                                                                                                              | CURRENT OCCUPATION | LAST OCCUPATION |
| NON-ACTIVE                                                                                                   |                    |                 |
| Responsible for ordinary shopping and looking after the home, or without any current occupation, not working | 1                  |                 |
| Student                                                                                                      | 2                  |                 |
| Unemployed or temporarily not working                                                                        | 3                  |                 |
| Retired or unable to work through illness                                                                    | 4                  |                 |
| SELF EMPLOYED                                                                                                |                    |                 |
| Farmer                                                                                                       | 5                  | 5               |
| Fisherman                                                                                                    | 6                  | 6               |
| Professional (lawyer, medical practitioner, accountant, architect, etc.)                                     | 7                  | 7               |
| Owner of a shop, craftsmen, other self-employed person                                                       | 8                  | 8               |
| Business proprietors, owner (full or partner) of a company                                                   | 9                  | 9               |
| EMPLOYED                                                                                                     |                    |                 |
| Employed professional (employed doctor, lawyer, accountant, architect)                                       | 10                 | 10              |
| General management, director or top management (managing directors, director general, other director)        | 11                 | 11              |
| Middle management, other management (department head, junior manager, teacher, technician)                   | 12                 | 12              |
| Employed position, working mainly at a desk                                                                  | 13                 | 13              |
| Employed position, not at a desk but travelling (salesmen, driver, etc.)                                     | 14                 | 14              |
| Employed position, not at a desk, but in a service job (hospital, restaurant, police, fireman, etc.)         | 15                 | 15              |
| Supervisor                                                                                                   | 16                 | 16              |
| Skilled manual worker                                                                                        | 17                 | 17              |
| Other (unskilled) manual worker, servant                                                                     | 18                 | 18              |
| Never did any paid work                                                                                      |                    | 19              |

|                  |
|------------------|
| EB79.3 D15a D15b |
|------------------|

NO QUESTIONS D16 TO D24

D25 Would you say you live in a...?

(READ OUT)

|                            |       |
|----------------------------|-------|
|                            | (710) |
| Rural area or village      | 1     |
| Small or medium-sized town | 2     |
| Large town/city            | 3     |
| DK                         | 4     |

EB79.3 D25

NO QUESTIONS D26 TO D39

D40a Could you tell me how many people aged 15 years or more live in your household, yourself included?

(INT.: READ OUT – WRITE DOWN)

(711-712)

|  |  |
|--|--|
|  |  |
|--|--|

EB79.3 D40a

D40b Could you tell me how many children less than 10 years old live in your household

(INT.: READ OUT – WRITE DOWN)

(713-714)

|  |  |
|--|--|
|  |  |
|--|--|

EB79.3 D40b

D40c Could you tell me how many children aged 10 to 14 years old live in your household?

(INT.: READ OUT – WRITE DOWN)

(715-716)

|  |  |
|--|--|
|  |  |
|--|--|

EB79.3 D40c

NO QUESTIONS D41 AND D42

D43a Is there a fixed telephone (landline) available in the household?

D43b Do you own a mobile phone?

|     |       |        |
|-----|-------|--------|
|     | (717) | (718)  |
|     | D43a  | D43b   |
|     | Fixed | Mobile |
| Yes | 1     | 1      |
| No  | 2     | 2      |

EB79.2 D43a D43b

NO QUESTIONS D44 AND D45

D46 Which of the following do you have?

(SHOW SCREEN - READ OUT - MULTIPLE ANSWERS POSSIBLE)

(719-728)

|                                                     |     |
|-----------------------------------------------------|-----|
| Television                                          | 1,  |
| DVD player                                          | 2,  |
| Music CD player                                     | 3,  |
| Computer                                            | 4,  |
| An Internet connection at home                      | 5,  |
| A car                                               | 6,  |
| A flat / a house which you have finished paying for | 7,  |
| A flat / a house which you are still paying for     | 8,  |
| None (SPONTANEOUS)                                  | 9,  |
| DK                                                  | 10, |

EB79.3 D46

NO QUESTIONS D47 TO D59

D60 During the last twelve months, how often have you had difficulties in paying your bills at the end of the month...?

(SHOW SCREEN - READ OUT)

(729)

|                       |   |
|-----------------------|---|
| Most of the time      | 1 |
| Occasionally          | 2 |
| Almost never\ never   | 3 |
| Refusal (SPONTANEOUS) | 4 |

EB79.3 D60

|     |                                                                                                                                                                                                |
|-----|------------------------------------------------------------------------------------------------------------------------------------------------------------------------------------------------|
| D61 | Could you please tell me where you would place yourself on the following scale? Where '1' corresponds to "the lowest level in society" and '10' corresponds to "the highest level in society." |
|-----|------------------------------------------------------------------------------------------------------------------------------------------------------------------------------------------------|

(SHOW SCREEN)

|    |                              | (730-731) |
|----|------------------------------|-----------|
| 1  | The lowest level in society  | 1         |
| 2  |                              | 2         |
| 3  |                              | 3         |
| 4  |                              | 4         |
| 5  |                              | 5         |
| 6  |                              | 6         |
| 7  |                              | 7         |
| 8  |                              | 8         |
| 9  |                              | 9         |
| 10 | The highest level in society | 10        |
|    | Refusal (SPONTANEOUS)        | 11        |

EB79.3 D61

|     |                          |
|-----|--------------------------|
| D62 | Could you tell me if...? |
|-----|--------------------------|

(SHOW SCREEN)

|  | (READ OUT) | Everyday \ Almost everyday | Two or three times a week | About once a week | Two or three times a month | Less often | Never | No Internet access (SPONTANEOUS) |
|--|------------|----------------------------|---------------------------|-------------------|----------------------------|------------|-------|----------------------------------|
|--|------------|----------------------------|---------------------------|-------------------|----------------------------|------------|-------|----------------------------------|

|       |   |                                                                            |   |   |   |   |   |   |   |
|-------|---|----------------------------------------------------------------------------|---|---|---|---|---|---|---|
| (732) | 1 | You use the Internet at home                                               | 1 | 2 | 3 | 4 | 5 | 6 | 7 |
| (733) | 2 | You use the Internet at your place of work                                 | 1 | 2 | 3 | 4 | 5 | 6 | 7 |
| (734) | 3 | You use the Internet somewhere else (school, university, cyber-café, etc.) | 1 | 2 | 3 | 4 | 5 | 6 | 7 |

EB79.3 D62

|     |                                                         |
|-----|---------------------------------------------------------|
| D63 | Do you see yourself and your household belonging to...? |
|-----|---------------------------------------------------------|

|                                        |
|----------------------------------------|
| (SHOW SCREEN – READ OUT – SINGLE CODE) |
|----------------------------------------|

|                              |       |
|------------------------------|-------|
|                              | (735) |
| The working class of society | 1     |
| The middle class of society  | 2     |
| The higher class of society  | 3     |
| Other (SPONTANEOUS)          | 4     |
| None (SPONTANEOUS)           | 5     |
| Refusal (SPONTANEOUS)        | 6     |
| DK                           | 7     |

|            |
|------------|
| EB79.3 D63 |
|------------|

|                     |
|---------------------|
| INTERVIEW PROTOCOLE |
|---------------------|

|    |                   |
|----|-------------------|
| P1 | DATE OF INTERVIEW |
|----|-------------------|

(756-757)

(758-759)

|  |  |     |
|--|--|-----|
|  |  | DAY |
|--|--|-----|

|  |  |       |
|--|--|-------|
|  |  | MONTH |
|--|--|-------|

|           |
|-----------|
| EB79.3 P1 |
|-----------|

|    |                                        |
|----|----------------------------------------|
| P2 | TIME OF THE BEGINNING OF THE INTERVIEW |
|----|----------------------------------------|

|                          |
|--------------------------|
| (INT.:USE 24 HOUR CLOCK) |
|--------------------------|

(760-761)

(762-763)

|  |  |      |
|--|--|------|
|  |  | HOUR |
|--|--|------|

|  |  |         |
|--|--|---------|
|  |  | MINUTES |
|--|--|---------|

|           |
|-----------|
| EB79.3 P2 |
|-----------|

|    |                                        |
|----|----------------------------------------|
| P3 | NUMBER OF MINUTES THE INTERVIEW LASTED |
|----|----------------------------------------|

(764-766)

|  |  |         |
|--|--|---------|
|  |  | MINUTES |
|--|--|---------|

|           |
|-----------|
| EB79.3 P3 |
|-----------|

|    |                                                                       |
|----|-----------------------------------------------------------------------|
| P4 | Number of persons present during the interview, including interviewer |
|----|-----------------------------------------------------------------------|

(767)

|                                  |
|----------------------------------|
| Two (interviewer and respondent) |
| Three                            |
| Four                             |
| Five or more                     |

1  
2  
3  
4

|           |
|-----------|
| EB79.3 P4 |
|-----------|

|    |                        |
|----|------------------------|
| P5 | Respondent cooperation |
|----|------------------------|

(768)

|           |
|-----------|
| Excellent |
| Fair      |
| Average   |
| Bad       |

1  
2  
3  
4

|           |
|-----------|
| EB79.3 P5 |
|-----------|

|    |                  |
|----|------------------|
| P6 | Size of locality |
|----|------------------|

|             |
|-------------|
| Local Codes |
|-------------|

(769-770)

|  |  |
|--|--|
|  |  |
|--|--|

|           |
|-----------|
| EB79.3 P6 |
|-----------|

|     |                                                                                                                       |
|-----|-----------------------------------------------------------------------------------------------------------------------|
| P7  | Region                                                                                                                |
|     | NUTS Level 2 Regions (See<br>www.wordiq.com/definition/Nomenclature_of_Territorial_Units_for_Statistics)<br>(771-772) |
|     | <input type="text"/>                                                                                                  |
|     | EB79.3 P7                                                                                                             |
| P8  | Postal code                                                                                                           |
|     | (773-780)                                                                                                             |
|     | <input type="text"/>                                                                                                  |
|     | EB79.3 P8                                                                                                             |
| P9  | Sample point number                                                                                                   |
|     | (781-788)                                                                                                             |
|     | <input type="text"/>                                                                                                  |
|     | EB79.3 P9                                                                                                             |
| P10 | Interviewer number                                                                                                    |
|     | (789-796)                                                                                                             |
|     | <input type="text"/>                                                                                                  |
|     | EB79.3 P10                                                                                                            |
| P11 | LEAVE BLANK                                                                                                           |
|     | (797-804)                                                                                                             |
|     | <input type="text"/>                                                                                                  |
|     | EB79.3 P11                                                                                                            |
|     | NO QUESTION P12                                                                                                       |
|     | ASK ONLY in LU, BE, ES, FI, EE, LV AND MT                                                                             |
